# Supplementary material for: Fuzzy supertertiary interactions within PSD-95 enable ligand binding
Source: eLife journal article supplement (doi:10.7554/elife.77242), 2022-09-07
Supplement: supp [file elife-77242-supp-v1.zip]

| 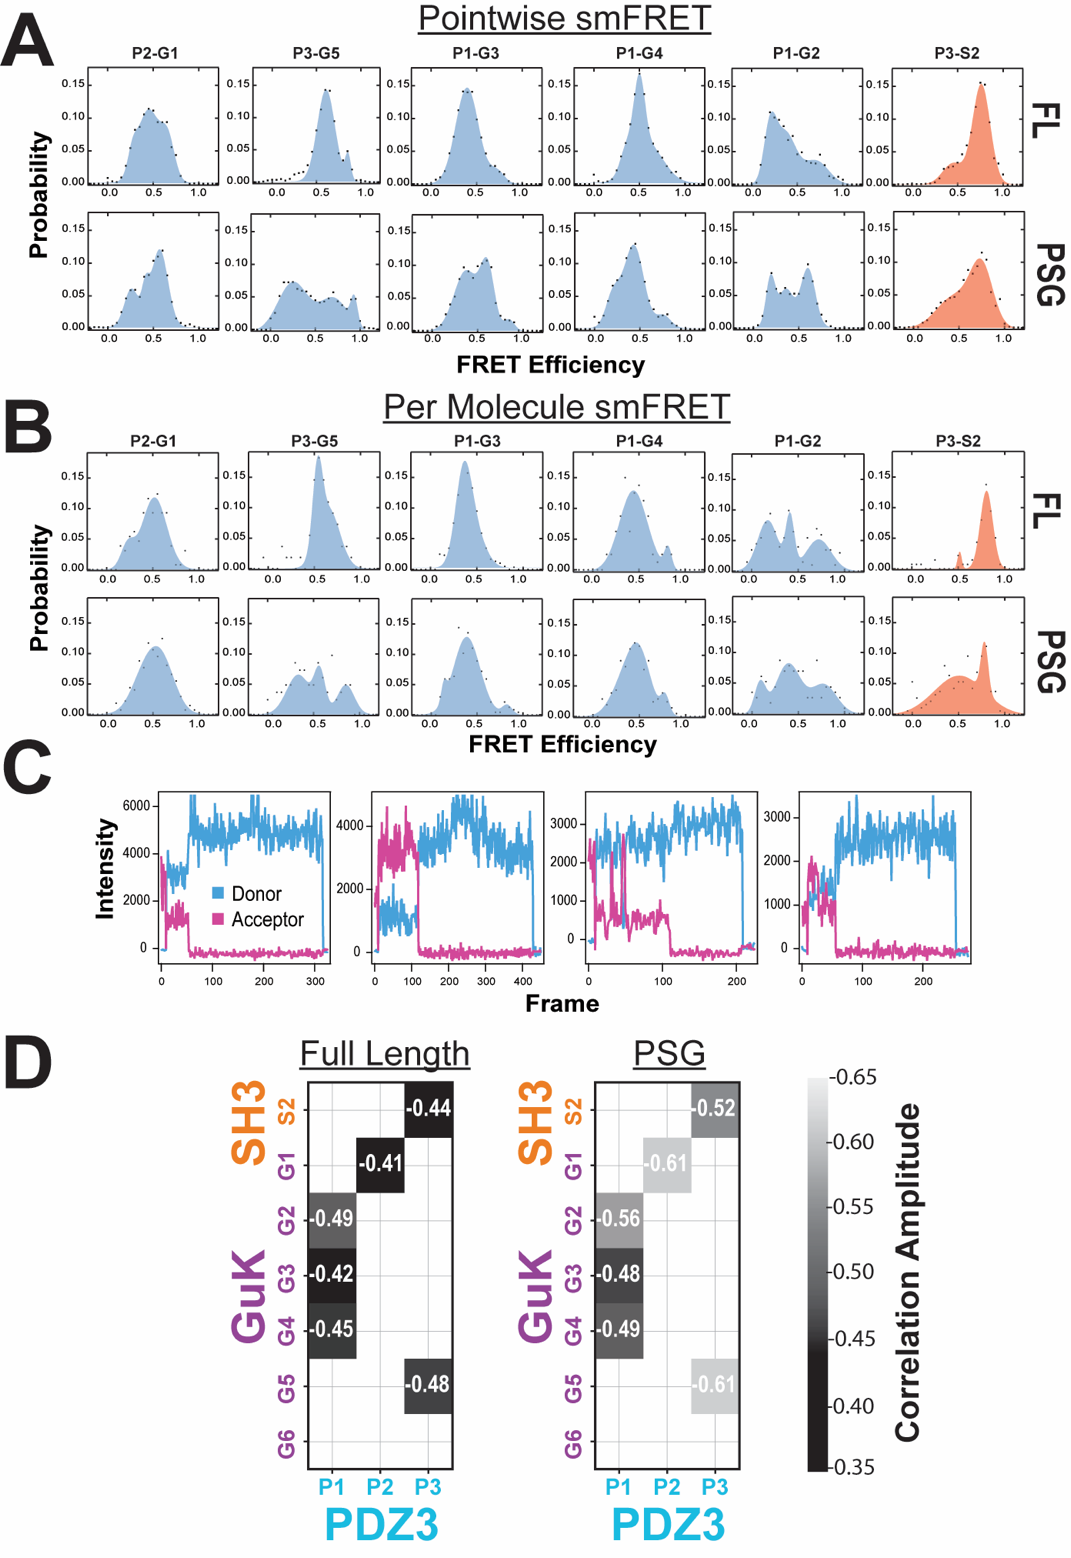 |
| --- |
| **Figure 4–figure supplement 1. Effect of Truncation on PSD-95 as Measured with smTIRF.** **A)** Population histograms of pointwise smTIRF data (per 100 millisecond frame) for variants with FRET pairs spanning PDZ3-GuK (blue), PDZ3-SH3 (red) as indicated above each panel. Shown are data for full-length PSD-95 (top) and the truncated PSG (bottom). **B)** Time-averaged (per molecule) population histograms from the same smTIRF data shown in panel A with identical coloring. **C)** Representative single-molecule time traces for variant P2-G1 in the PSG truncation showing static and dynamic molecules. **D)** Matrix representation of site-specific dynamics in full-length PSD-95 (left) and the PSG truncation (right). The axes specify the domains and labeling sites with each variant placed at the intersection between sites used. Shown are the mean Pearson Correlation Coefficients as calculated from smTIRF donor-acceptor time traces before photobleaching occurred. The Pearson Correlation Coefficients capture anticorrelated FRET transitions on the sub-second timescale such as those visible in panel C. |
