# Supplementary material for: Fuzzy supertertiary interactions within PSD-95 enable ligand binding
Source: eLife journal article supplement (doi:10.7554/elife.77242), 2022-09-07
Supplement: supp [file elife_poa_e77242_Figure_4_figure_supplement_2.docx]

| 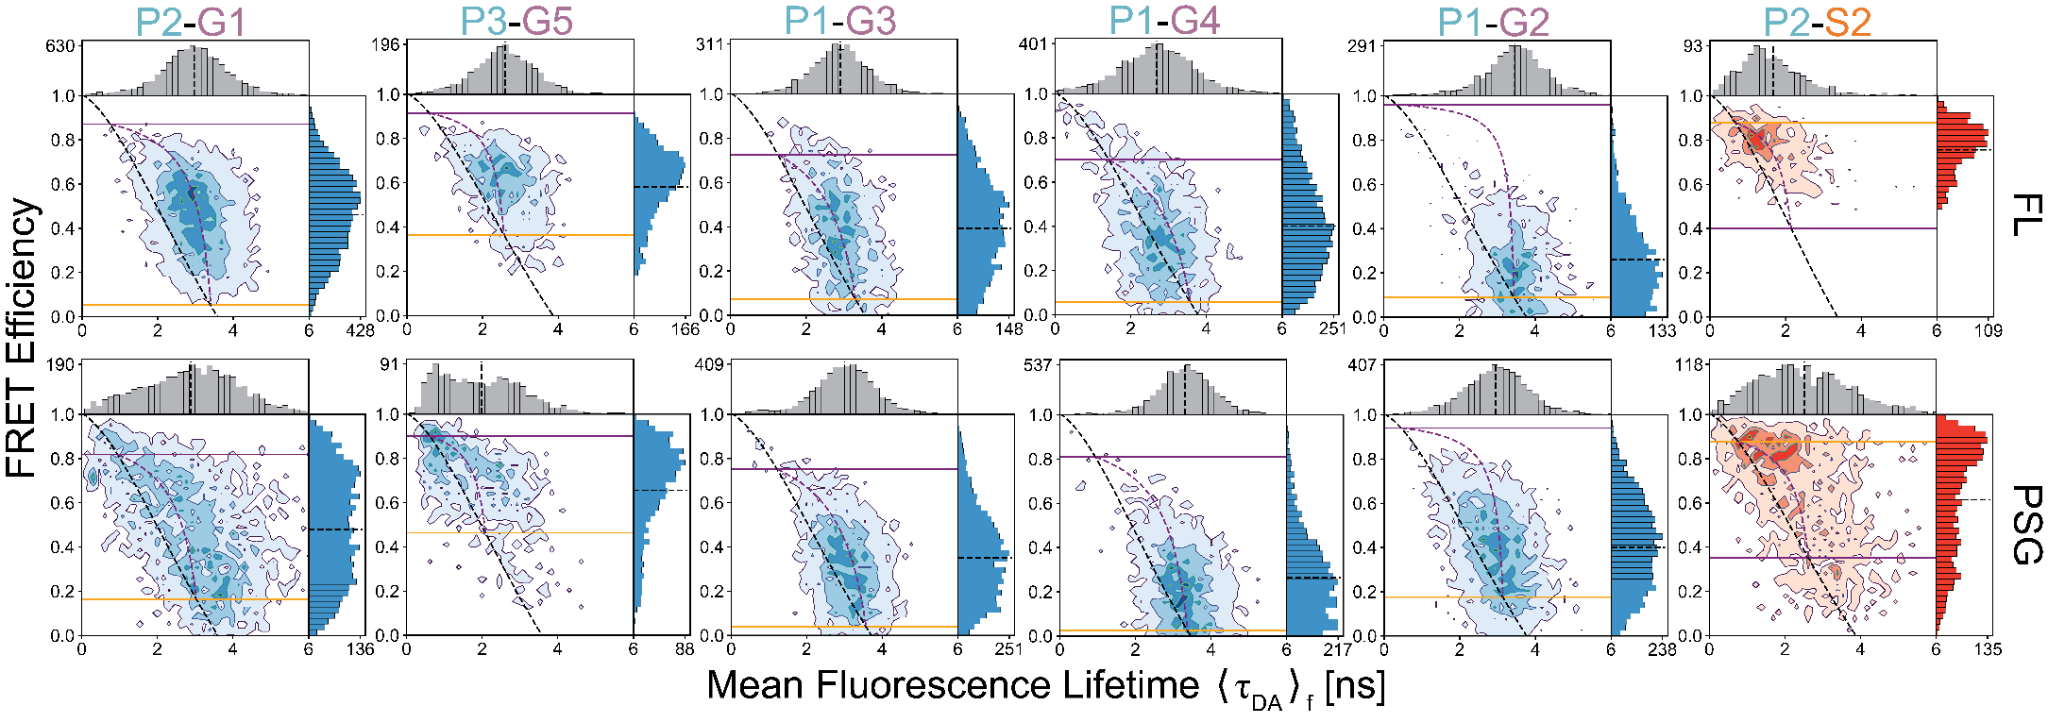 |
| --- |
| **Figure 4–figure supplement 2. Comparison of Multiparameter Fluorescence Histograms of PSG-Truncated and Full-Length PSD-95 FRET Variants.** MFD plots of PSG truncations (bottom). FL variants with same labeling sites are shown for comparison (top). The labeling sites are indicated within each panel. Dynamic lines and limiting states for PSG variants were determined from global fitting of donor fluorescence decays of PSG variants shown in Figure 3. Experimental parameters can be found in Figure 3 - Figure supplement 1A and 3B. Fit parameters for determination of the limiting states can be found in Figure 3 - Figure supplement 1C and D. Parameters for the calculation of static and dynamic FRET lines can be found in Figure 3 - Figure supplement 1E and 3F. |
