# Supplementary material for: Fuzzy supertertiary interactions within PSD-95 enable ligand binding
Source: eLife journal article supplement (doi:10.7554/elife.77242), 2022-09-07
Supplement: supp [file elife_poa_e77242_Figure_4_figure_supplement_3.docx]

| 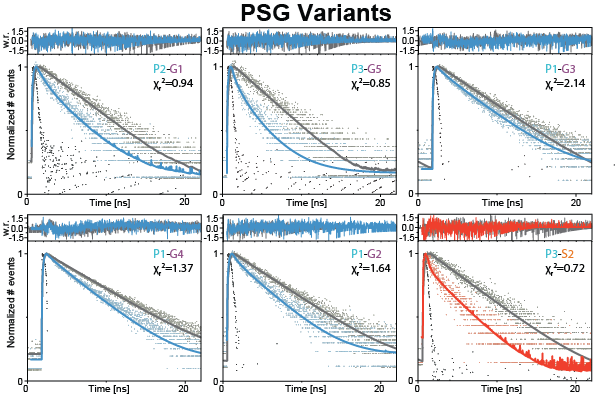 |
| --- |
| **Figure 4–figure supplement 3. Global Fit of seTCSPC FRET-Sensitized Donor Fluorescence Decay Curves for Truncated PSG Variants.** Fit parameters can be found in Figure 3 - Figure supplement 1C and D. Fits are analogous to those shown in Figure 3 but for PSG variants Donor only samples colored grey. FRET-sensitized donor decays colored blue for PDZ3-GuK; red for PDZ3-SH3. |
