# Supplementary material for: Fuzzy supertertiary interactions within PSD-95 enable ligand binding
Source: eLife journal article supplement (doi:10.7554/elife.77242), 2022-09-07
Supplement: supp [file elife_poa_e77242_Figure_4_figure_supplement_4.docx]

| 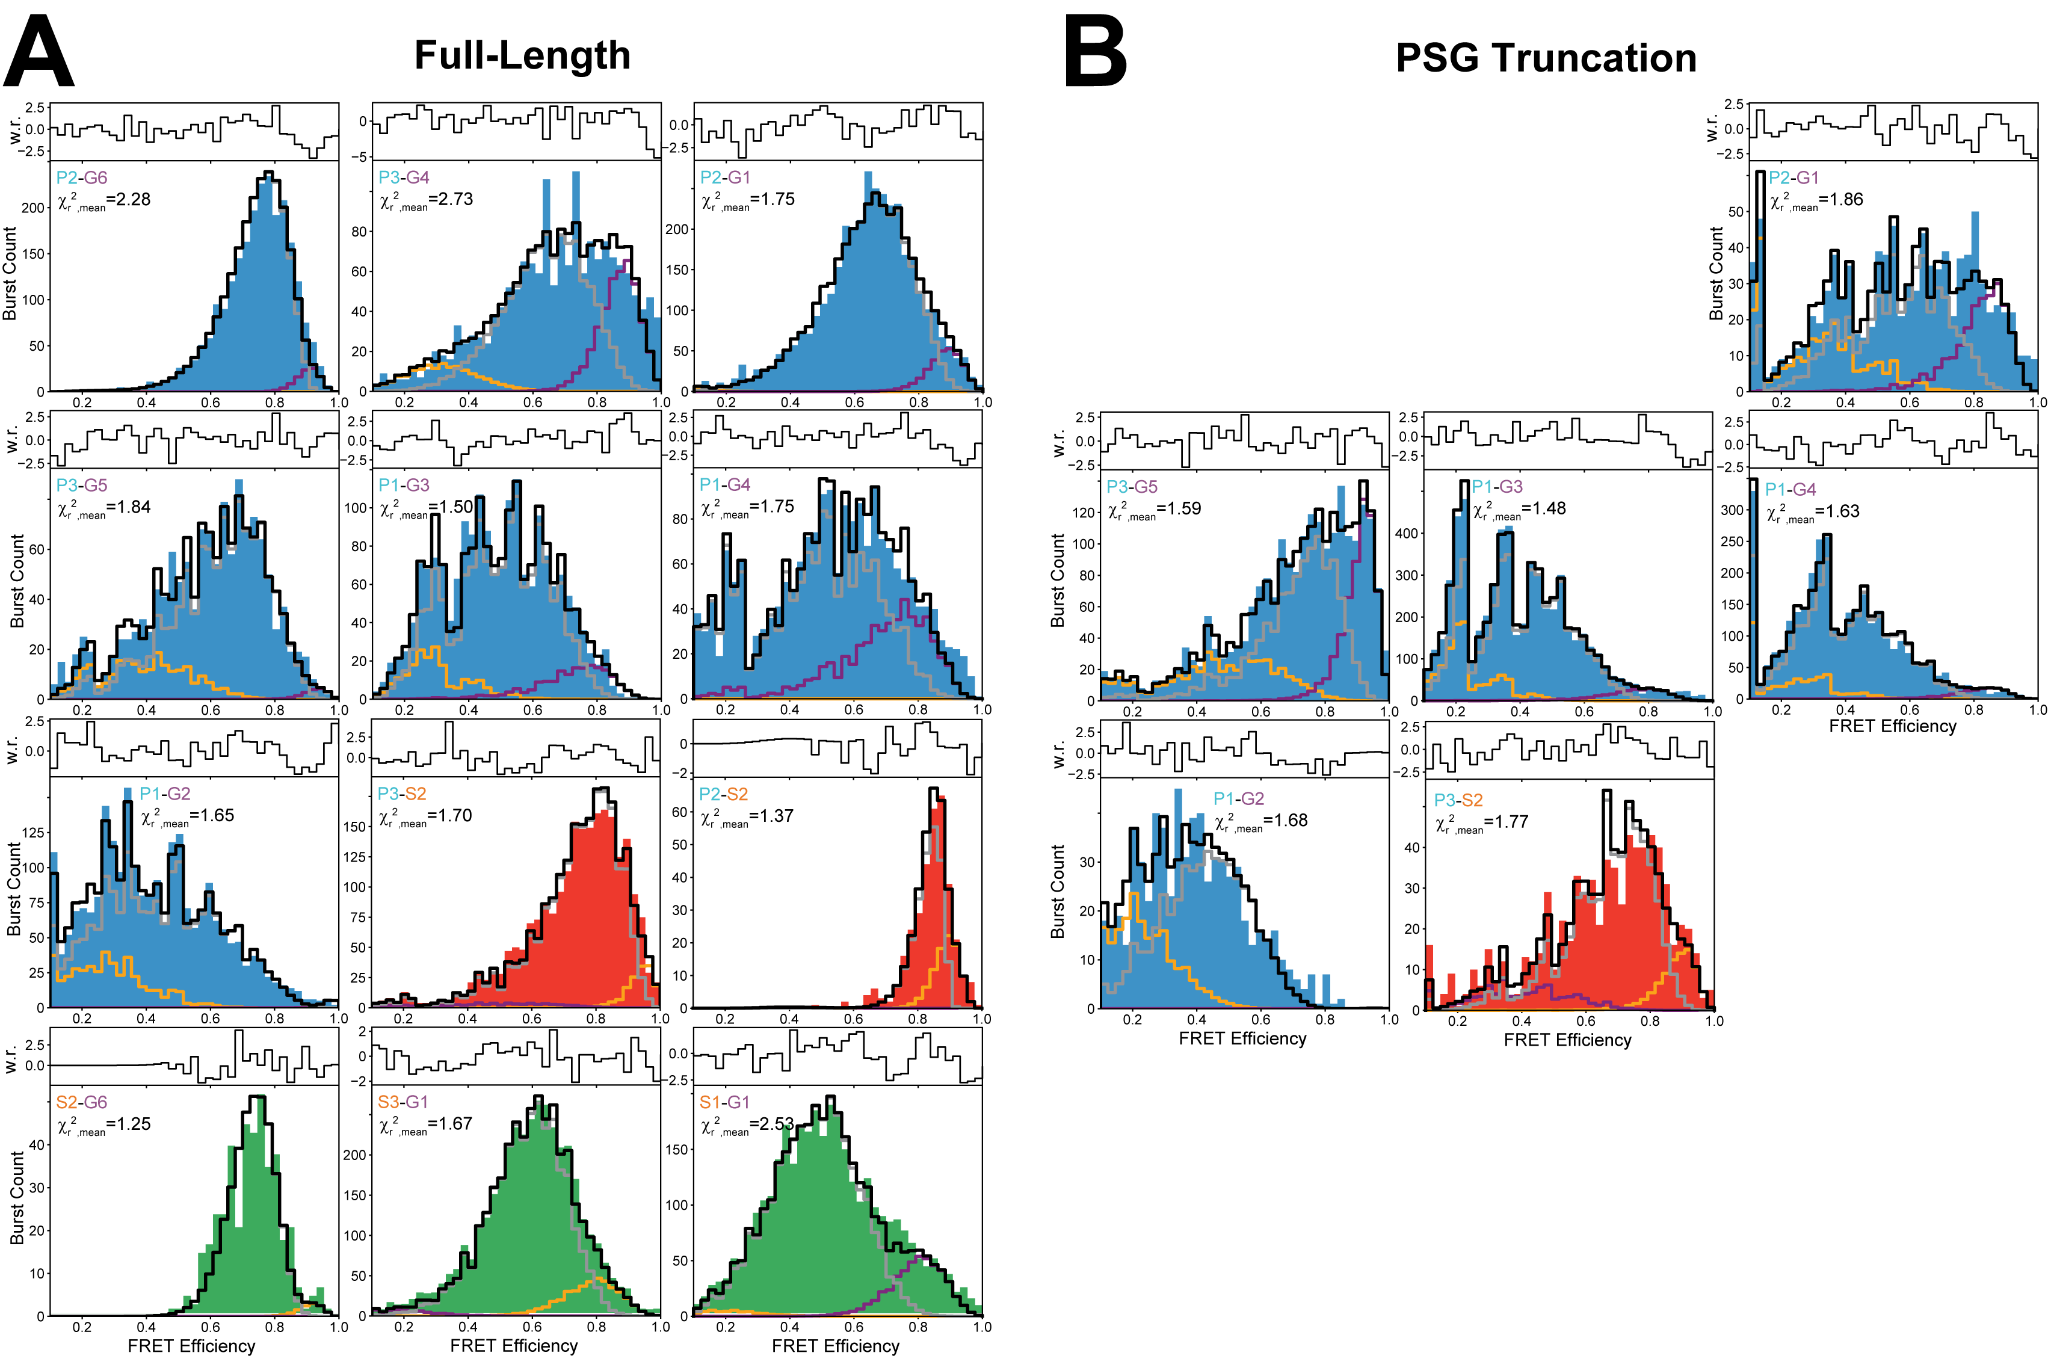 |
| --- |
| **Figure 4–figure supplement 4. Photon Distribution Analysis Histograms.** Representative photon distribution analysis for both Full Length PSD-95 and PSG truncated variants. Data shown is binned using 2 ms time windows. Fits were performed globally with 1 ms, 2 ms, and 3 ms time windows for each sample. The displayed is the simple mean of for fits of all three time windows. Raw data is color coded as blue (PDZ3-GuK), red (PDZ3-SH3), or green (SH3-GuK). Data is binned using 50 evenly spaced bins in FRET efficiency. Fits are shown in grey (dynamic fraction), orange (state A static fraction), purple (state B static fraction), and black (sum of three components). Fit parameters can be found in Figure 4 - Figure supplement 5. |
