# Supplementary material for: Fuzzy supertertiary interactions within PSD-95 enable ligand binding
Source: eLife journal article supplement (doi:10.7554/elife.77242), 2022-09-07
Supplement: supp [file elife_poa_e77242_Figure_6_figure_supplement_2.docx]

| 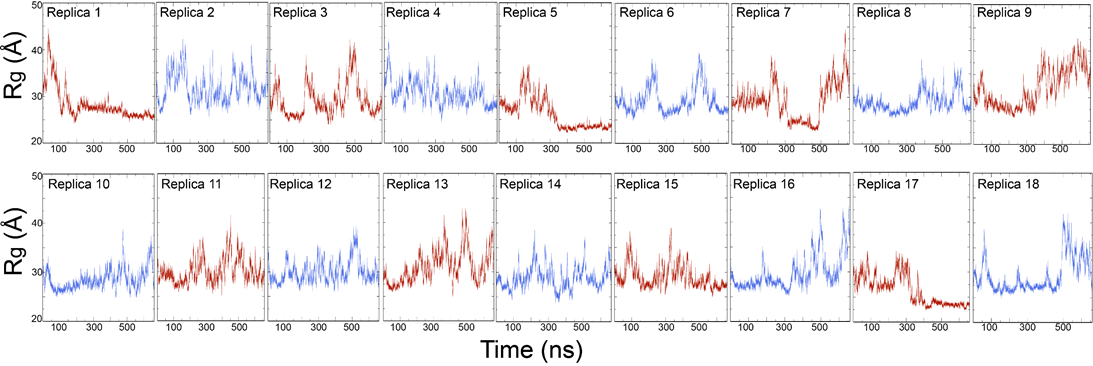 |
| --- |
| **Figure 6–figure supplement 2. Time evolution of the radius of gyration (*Rg*) of PSG supramodule for 18 replicas DMD simulations.** The total simulation time for each replica is 660 ns and amounts to a total simulation time of 11.9 μs. We used the last 400 ns of replica exchange trajectories for the statistical analysis. |
