# Supplementary material for: Fuzzy supertertiary interactions within PSD-95 enable ligand binding
Source: eLife journal article supplement (doi:10.7554/elife.77242), 2022-09-07
Supplement: supp [file elife_poa_e77242_Figure_7_figure_supplement_1.docx]

| 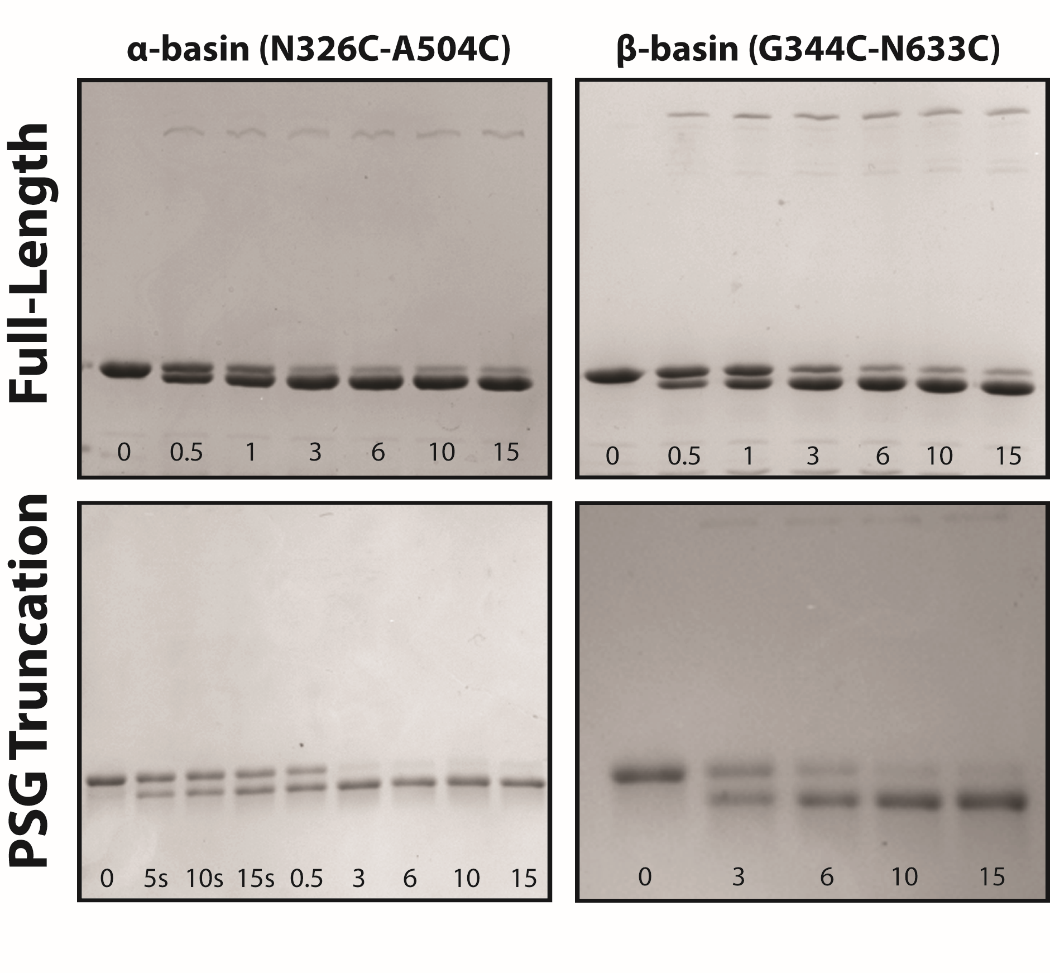 |
| --- |
| **Figure 7–figure supplement 1. Disulfide Mapping of the Contact Interfaces from DMD.** Representative non-reducing SDS-PAGE gels used to extract kinetic information about rates of disulfide formation. The top row shows 7.5% acrylamide gels for full-length PSD-95 variants. The bottom row shows 10% acrylamide gels used for PSG truncations. The variant and the introduced mutations are noted above each column. The time for each lane is indicated within each panel in minutes unless indicated otherwise. The background-subtracted intensity of each band was obtained using ImageJ to calculate the background-subtracted mean intensity, which are plotted in Figure 7. Each experiment was repeated in triplicate. |
