# Supplementary material for: Fuzzy supertertiary interactions within PSD-95 enable ligand binding
Source: eLife journal article supplement (doi:10.7554/elife.77242), 2022-09-07
Supplement: supp [file elife_poa_e77242_Figure_7_figure_supplement_2.docx]

| 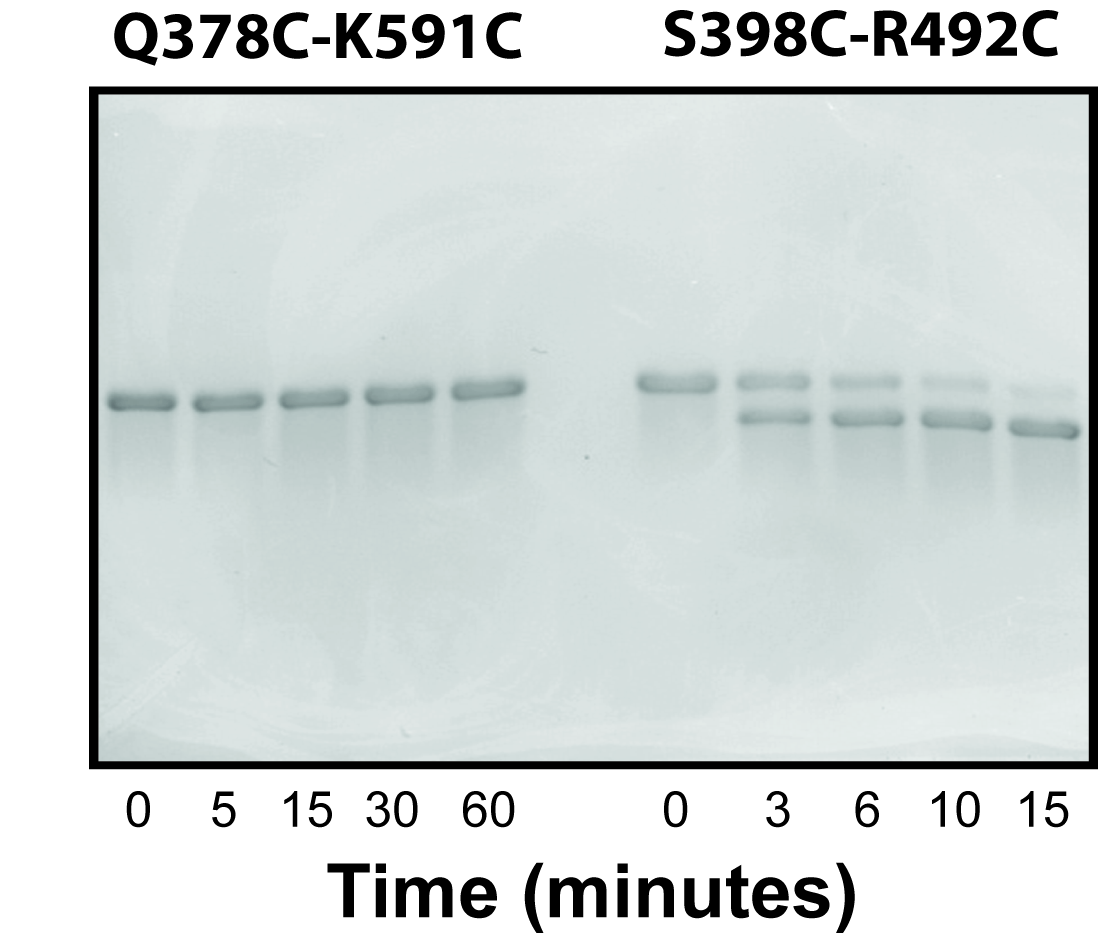 |
| --- |
| **Figure 7–figure supplement 2. Controls for Disulfide Mapping of the Contact Interfaces from DMD.** Representative non-reducing SDS-PAGE using 10% acrylamide gels to probe for disulfide formation in selected FRET variants. The variant Q378-K591 residue pair is not predicted to be in contact as part of either conformational basin. In contrast, the S398-R492 residue pair does occasionally sample close distances in the α-basin. The experiments used PSG truncations with the introduced mutations as noted above each experiment. The time for each lane is indicated beneath the panel in minutes. |
