# Supplementary material for: Fuzzy supertertiary interactions within PSD-95 enable ligand binding
Source: eLife journal article supplement (doi:10.7554/elife.77242), 2022-09-07
Supplement: supp [file Molecule Number Information.xlsx]

## Sheet: Sheet1
Variants		# of sample used	# of repeats	# of moles.	# of pwFRET data points	# movies
P3-S2	F.L.	1	3	69	6563	15
	PSG	1	3	189	3376	24
P1-G3	F.L.	1	3	610	4487	25
	PSG	1	3	236	2733	29
P3-G5	F.L.	1	2	55	1875	20
	PSG	1	2	82	4833	15
P2-G1	F.L.	1	3	120	3023	24
	PSG	1	3	273	2504	18
P1-G4	F.L.	1	3	80	6434	15
	PSG	1	3	198	11843	26
P1-G2	F.L.	1	3	202	2187	22
	PSG	1	3	115	3337	18
