# Supplementary material for: Fuzzy supertertiary interactions within PSD-95 enable ligand binding
Source: eLife journal article supplement (doi:10.7554/elife.77242), 2022-09-07
Supplement: supp [file Raw data for Figure 4 Figure Supplement 1A.xlsx]

## Sheet: Raw data for Figure 4 Figure Su
Pointwise
P2-G1			P3-G5			P1-G3			P1-G4			P1-G2			P3-S2
FL	PSG		FL	PSG		FL	PSG		FL	PSG		FL	PSG		FL	PSG
0.00017375	0.4462		0.57051	8.8e-05		0.57158	0.050113		0.97888	0.015046		0.55647	0.43858		0.31775	0.43429
0.0019594	0.40845		0.58446	1.5693		0.53581	0.052698		0.97669	0.01506		0.55409	0.43898		0.3645	0.35558
0.0047001	0.50912		0.62955	1.2324		0.49761	0.052729		0.97667	0.015148		0.38223	0.46882		0.51226	0.29862
0.0049566	0.66565		0.59385	1.1725		0.40914	0.053656		0.97615	0.015227		0.39866	0.5368		0.3889	0.21146
0.0053261	0.47137		0.6068	1.1691		0.42567	0.054952		0.97478	0.015249		0.29703	0.62002		0.46833	0.24137
0.0058978	0.42407		0.58509	1.1673		0.33316	0.055973		0.97468	0.015422		0.36245	0.54214		0.47312	0.30637
0.0069864	0.46282		0.63826	1.1634		0.38618	0.057334		0.97441	0.015435		0.34851	0.53543		0.44611	0.49759
0.0080082	0.45955		0.64809	1.1596		0.40364	0.066203		0.97372	0.015491		0.34959	0.35501		0.41601	0.33967
0.0097306	0.651		0.70251	1.1591		0.43041	0.06991		0.97359	0.01562		0.28299	0.53167		0.42327	0.27638
0.010743	0.44521		0.65096	1.1516		0.46077	0.077507		0.9735	0.015648		0.24519	0.53389		0.49341	0.37058
0.011848	0.40026		0.72902	1.147		0.48215	0.078283		0.97179	0.015661		0.36493	0.51288		0.4792	0.21671
0.01319	0.46377		0.74397	1.1415		0.33653	0.080701		0.97103	0.015716		0.29306	0.52351		0.51524	0.14494
0.015083	0.43163		0.77616	1.1376		0.46593	0.083112		0.97096	0.015718		0.29676	0.46792		0.46101	0.2613
0.019648	0.60005		0.70645	1.1311		0.19784	0.090706		0.97074	0.015778		0.3281	0.55663		0.44837	0.15919
0.021867	0.44995		0.66473	1.1311		0.59478	0.091257		0.97047	0.015795		0.33473	0.59439		0.55415	0.1344
0.022177	0.42621		0.71974	1.1258		0.67918	0.091615		0.97019	0.015816		0.37562	0.5753		0.53294	0.12332
0.029465	0.37953		0.71528	1.1227		0.62029	0.092129		0.96999	0.015839		0.26763	0.52154		0.5845	0.21291
0.030687	0.39876		0.75435	1.1207		0.41819	0.092558		0.96981	0.015844		0.30149	0.62158		0.50255	0.18511
0.031557	0.3483		0.77388	1.1178		0.37845	0.097883		0.96918	0.015871		0.27377	0.64563		0.53558	0.24143
0.032022	0.46966		0.78694	1.1041		0.41775	0.10425		0.96814	0.01595		0.27894	0.50727		0.4979	0.19204
0.036202	0.442		0.65617	1.0983		0.58582	0.10857		0.96752	0.015991		0.30483	0.44389		0.54624	0.19152
0.038504	0.48144		0.51585	1.0964		0.39038	0.11057		0.96686	0.016098		0.19184	0.39114		0.40159	0.2825
0.040753	0.42028		0.78696	1.096		0.41381	0.11483		0.96621	0.016132		0.33037	0.30286		0.57889	0.15635
0.043274	0.42101		0.71462	1.0942		0.49115	0.11707		0.96506	0.016173		0.28336	0.30569		0.76593	0.2259
0.044379	0.48475		0.72433	1.089		0.26891	0.11775		0.96503	0.016223		0.26163	0.36061		0.78623	0.39342
0.045699	0.46732		0.77519	1.0882		0.35231	0.12284		0.96427	0.016226		0.2417	0.34183		0.90036	0.34051
0.050167	0.47156		0.78456	1.0877		0.30505	0.12313		0.96421	0.01624		0.29466	0.38542		0.76768	0.34887
0.050339	0.61426		0.74117	1.0781		0.34297	0.1271		0.96421	0.016244		0.33875	0.37883		0.8512	0.3088
0.050553	0.28167		0.7438	1.0753		0.45575	0.12758		0.96344	0.016256		0.27376	0.34086		0.82038	0.4252
0.052346	0.05925		0.78094	1.0692		0.44321	0.12947		0.96278	0.016276		0.30795	0.33624		0.80646	0.51206
0.064547	0.089177		0.75646	1.0668		0.52795	0.13327		0.9625	0.016347		0.32744	0.37035		0.85415	0.34385
0.071834	0.10954		0.64546	1.0661		0.3774	0.13446		0.96171	0.01637		0.36136	0.31439		0.82594	0.45614
0.077302	0.51813		0.74006	1.061		0.22425	0.13507		0.96117	0.016428		0.30028	0.33688		0.83513	0.37083
0.079877	0.34387		0.76895	1.0577		0.42673	0.13524		0.96092	0.01644		0.23217	0.34077		0.88292	0.29769
0.089168	0.42884		0.7523	1.0577		0.45957	0.13864		0.96034	0.016442		0.28199	0.32025		0.7813	0.20754
0.090196	0.36014		0.66727	1.0555		0.43029	0.13925		0.95988	0.016447		0.28196	0.32735		0.89817	0.10295
0.12192	0.51973		0.60902	1.0496		0.36278	0.14055		0.95905	0.01651		0.35888	0.39145		0.8088	0.44188
0.13186	0.40269		0.65094	1.0472		0.36802	0.14099		0.95889	0.016585		0.33795	0.35515		0.76461	0.48285
0.13342	0.40243		0.6728	1.0468		0.34678	0.14151		0.95832	0.016633		0.29521	0.35115		0.83699	0.50624
0.13464	0.43722		0.69029	1.0459		0.18968	0.14351		0.95796	0.016634		0.32152	0.29166		0.75367	0.45286
0.13952	0.41912		0.64305	1.0459		0.35417	0.14362		0.95735	0.016685		0.33799	0.38158		0.84291	0.40324
0.14205	0.41513		0.58695	1.0458		0.35466	0.14478		0.95709	0.01681		0.23951	0.30915		0.81275	0.56276
0.14881	0.37174		0.61843	1.0438		0.33828	0.14864		0.95624	0.016837		0.18733	0.37126		0.85674	0.39703
0.15121	0.40335		0.67146	1.0432		0.37275	0.1496		0.95624	0.016863		0.19945	0.38782		0.85684	0.4661
0.15203	0.53041		0.64035	1.0424		0.2722	0.1501		0.95602	0.017083		0.25683	0.41289		0.80706	0.27384
0.1602	0.39552		0.70955	1.0406		0.37922	0.15213		0.95573	0.017195		0.28081	0.41947		0.82884	0.16311
0.1634	0.38799		0.73656	1.0391		0.45985	0.15329		0.95561	0.0172		0.19078	0.33431		0.89913	0.26607
0.16415	0.32814		0.64812	1.0384		0.29522	0.15356		0.95489	0.017261		0.27409	0.40491		0.84033	0.41421
0.16586	0.23179		0.56235	1.038		0.44975	0.15454		0.95469	0.017273		0.19496	0.41821		0.8117	0.62425
0.16689	0.36288		0.5672	1.0374		0.19752	0.15625		0.95442	0.017281		0.27106	0.33369		0.75946	0.53316
0.16727	0.43922		0.57573	1.0361		0.27345	0.15745		0.95393	0.017351		0.22715	0.33144		0.83961	0.59128
0.17019	0.51227		0.63675	1.032		0.31241	0.16024		0.95366	0.017353		0.32866	0.31786		0.83012	0.67691
0.17501	0.45715		0.63104	1.0317		0.4273	0.16109		0.95312	0.017391		0.29077	0.36673		0.7657	0.57978
0.17531	0.4906		0.67908	1.0289		0.23976	0.16128		0.95213	0.017395		0.29204	0.36305		0.81175	0.62598
0.17693	0.41236		0.64688	1.0281		0.28563	0.1627		0.95166	0.017412		0.34075	0.27659		0.81484	0.52301
0.17879	0.33187		0.64541	1.0271		0.39413	0.16518		0.95114	0.017443		0.3623	0.32134		0.81422	0.42693
0.17879	0.43847		0.63773	1.023		0.31765	0.16549		0.95021	0.017496		0.28151	0.32692		0.82687	0.39187
0.18274	0.47003		0.6268	1.0226		0.34577	0.16596		0.94984	0.017537		0.30458	0.2851		0.88667	0.35234
0.18421	0.40251		0.50873	1.0218		0.43772	0.16633		0.94966	0.01755		0.30852	0.27777		0.8354	0.4382
0.18557	0.53732		0.58875	1.0217		0.36573	0.16657		0.94917	0.017618		0.33073	0.40868		0.84536	0.46946
0.18988	0.3431		0.63927	1.0214		0.43155	0.16698		0.94907	0.017625		0.35738	0.34643		0.79996	0.61973
0.19056	0.27906		0.70669	1.021		0.43408	0.16773		0.94895	0.017652		0.30984	0.36469		0.84933	0.3889
0.19079	0.37596		0.6339	1.0203		0.45928	0.16812		0.94879	0.017696		0.29904	0.34812		0.79743	0.51455
0.19165	0.38724		0.59797	1.0203		0.39663	0.16816		0.94837	0.017829		0.30654	0.31393		0.80665	0.43995
0.19236	0.55489		0.72533	1.02		0.37815	0.16958		0.9483	0.017841		0.36786	0.37549		0.83626	0.40963
0.19308	0.3074		0.71886	1.0197		0.32885	0.17052		0.94816	0.017851		0.36575	0.29906		0.6722	0.43916
0.19364	0.38036		0.66315	1.0194		0.33908	0.17352		0.94787	0.017922		0.44143	0.3591		0.83767	0.45463
0.19395	0.43743		0.68712	1.0193		0.35575	0.17418		0.94783	0.017946		0.45472	0.33357		0.78785	0.43965
0.19714	0.41686		0.6358	1.0187		0.38508	0.17434		0.94762	0.017958		0.49922	0.28327		0.83301	0.5341
0.19892	0.40065		0.6759	1.0169		0.24737	0.17489		0.94758	0.017986		0.33857	0.38541		0.84735	0.32718
0.19961	0.379		0.64725	1.0166		0.38607	0.17539		0.94739	0.018074		0.48204	0.30599		0.83351	0.48114
0.20092	0.59551		0.71108	1.0161		0.29638	0.17546		0.94693	0.018076		0.46703	0.42365		0.78113	0.41673
0.20125	0.47922		0.5945	1.0149		0.30756	0.17566		0.94648	0.018117		0.45208	0.37514		0.79252	0.52016
0.20189	0.38863		0.61793	1.0149		0.33377	0.17711		0.94642	0.01813		0.47383	0.36092		0.85757	0.44935
0.2019	0.4158		0.57025	1.0119		0.35341	0.17808		0.94573	0.018173		0.43691	0.43447		0.78093	0.40333
0.20199	0.47447		0.61483	1.0117		0.25455	0.17854		0.94568	0.018366		0.41285	0.31551		0.85804	0.35284
0.20309	0.42602		0.65818	1.0114		0.27471	0.17874		0.94517	0.01849		0.41654	0.4266		0.82372	0.34932
0.20429	0.39774		0.68107	1.0109		0.29582	0.17921		0.94503	0.018495		0.40384	0.41472		0.86505	0.35707
0.20473	0.42326		0.64037	1.0106		0.35992	0.17941		0.94493	0.018542		0.48758	0.48909		0.8499	0.38248
0.20643	0.47921		0.61228	1.0101		0.27388	0.18072		0.94493	0.018547		0.42941	0.36884		0.86185	0.30125
0.20786	0.31939		0.66308	1.0099		0.32349	0.18109		0.94472	0.018561		0.41544	0.48044		0.74672	0.43509
0.20891	0.36867		0.68445	1.0082		0.37574	0.18145		0.94466	0.018646		0.45829	0.47138		0.75011	0.3346
0.20946	0.36624		0.71413	1.008		0.31646	0.18242		0.94423	0.018758		0.47052	0.57452		0.79924	0.27336
0.21053	0.42507		0.69488	1.0076		0.28722	0.18275		0.94403	0.018796		0.45283	0.23483		0.7755	0.3134
0.21186	0.45097		0.55697	1.0069		0.32244	0.18294		0.9438	0.01888		0.51873	0.26144		0.81247	0.44421
0.21315	0.30223		0.60459	1.0066		0.39354	0.18305		0.94257	0.018903		0.45148	0.39499		0.85514	0.4081
0.2137	0.41853		0.63343	1.006		0.2776	0.1837		0.94239	0.018909		0.39911	0.49268		0.73326	0.3815
0.21416	0.33693		0.55106	1.0056		0.30679	0.1839		0.9421	0.018953		0.456	0.35514		0.76349	0.29879
0.21534	0.427		0.65851	1.0054		0.21834	0.18551		0.94124	0.019038		0.49884	0.46915		0.82737	0.4148
0.21553	0.36169		0.63922	1.0048		0.33431	0.18653		0.94124	0.019095		0.51403	0.44153		0.72437	0.49653
0.21584	0.47683		0.69974	1.0048		0.24837	0.18701		0.9412	0.019209		0.48006	0.31727		0.76977	0.44582
0.2168	0.54612		0.68613	1.0047		0.30733	0.18838		0.94106	0.019239		0.45282	0.42838		0.79389	0.57058
0.21695	0.41418		0.59342	1.0044		0.23896	0.18866		0.94064	0.019258		0.49331	0.39525		0.81293	0.4437
0.21725	0.48453		0.57197	1.0036		0.18679	0.18877		0.94018	0.01932		0.44177	0.52809		0.82947	0.61265
0.21771	0.46626		0.55651	1.0036		0.29286	0.1896		0.93961	0.019374		0.53504	0.39394		0.77141	0.5914
0.21773	0.181		0.62362	1.0015		0.23852	0.1897		0.9396	0.019399		0.50865	0.48199		0.81136	0.52473
0.2184	0.28582		0.61706	1.0008		0.24248	0.18987		0.93959	0.019412		0.41786	0.54582		0.77188	0.51023
0.21866	0.24067		0.71406	1.0006		0.26675	0.19166		0.93933	0.019488		0.42112	0.41216		0.74468	0.44397
0.22023	0.35498		0.66058	1		0.26864	0.19193		0.93919	0.019543		0.45908	0.32925		0.82588	0.59428
0.22081	0.23448		0.70867	0.99989		0.29584	0.19205		0.93886	0.019617		0.41181	0.36685		0.77629	0.45877
0.22178	0.28498		0.64578	0.99967		0.37108	0.19235		0.93754	0.019664		0.47493	0.40532		0.80986	0.30164
0.22207	0.20971		0.59572	0.99913		0.18779	0.19272		0.93635	0.019784		0.36538	0.34457		0.83147	0.45377
0.22303	0.31258		0.65206	0.99912		0.31974	0.19298		0.93623	0.019855		0.44512	0.30525		0.75751	0.55639
0.22353	0.2868		0.77204	0.99911		0.32738	0.19382		0.93622	0.019903		0.46991	0.37708		0.77784	0.42327
0.22456	0.26011		0.69546	0.99798		0.35201	0.19408		0.93585	0.019909		0.52392	0.30934		0.79701	0.53181
0.22525	0.24295		0.57773	0.9978		0.2409	0.1942		0.93558	0.019972		0.40374	0.3362		0.90141	0.43703
0.22641	0.24698		0.54523	0.99776		0.21239	0.19592		0.93554	0.019999		0.45761	0.59602		0.753	0.47925
0.2265	0.28311		0.58143	0.99773		0.26727	0.19594		0.93546	0.020049		0.41863	0.5004		0.85114	0.40563
0.22705	0.29862		0.69767	0.99748		0.42944	0.19611		0.93508	0.020063		0.51626	0.38031		0.69873	0.42064
0.22724	0.15968		0.65116	0.99685		0.42469	0.19724		0.93414	0.020071		0.45228	0.31857		0.73291	0.39599
0.22745	0.2481		0.63686	0.99649		0.24885	0.19928		0.93387	0.020173		0.43002	0.32008		0.83718	0.25838
0.22812	0.2233		0.67534	0.99633		0.32209	0.19961		0.93342	0.020241		0.40819	0.37085		0.76034	0.36825
0.22846	0.23058		0.71521	0.99564		0.24637	0.19967		0.93331	0.020354		0.38613	0.32513		0.8289	0.43217
0.23116	0.28435		0.66402	0.99559		0.33738	0.20062		0.93302	0.02046		0.46755	0.429		0.77316	0.55053
0.23181	0.23486		0.69873	0.99556		0.32658	0.20108		0.93266	0.020511		0.48212	0.32467		0.77842	0.7448
0.2334	0.32372		0.74314	0.99534		0.27288	0.20178		0.93239	0.020607		0.38418	0.49522		0.82581	0.78818
0.2336	0.25228		0.6556	0.99412		0.27701	0.20207		0.9321	0.0207		0.48705	0.19892		0.70133	0.8032
0.23597	0.31495		0.73517	0.99368		0.26717	0.20268		0.93128	0.020946		0.43501	0.18336		0.78427	0.84025
0.23668	0.29775		0.69624	0.99346		0.26446	0.20324		0.93118	0.020962		0.54675	0.21729		0.79324	0.57378
0.2367	0.25012		0.62476	0.99332		0.32369	0.20456		0.93085	0.020974		0.47287	0.20936		0.69981	0.70695
0.23695	0.26575		0.67049	0.99332		0.27796	0.20458		0.93077	0.021018		0.49011	0.20339		0.72886	0.7286
0.23709	0.21983		0.67854	0.99274		0.19796	0.20576		0.93053	0.021074		0.4119	0.1066		0.8406	0.85257
0.23729	0.35199		0.58321	0.99203		0.34508	0.20591		0.93032	0.021342		0.39257	0.21911		0.79643	0.73674
0.23751	0.2955		0.61566	0.9918		0.51087	0.20768		0.92973	0.021354		0.39859	0.21683		0.67367	0.7227
0.23796	0.15285		0.56405	0.99178		0.51045	0.20775		0.92949	0.021368		0.43446	0.25089		0.82936	0.65588
0.23998	0.21035		0.60556	0.99126		0.34231	0.20879		0.92947	0.021456		0.43679	0.26823		0.80277	0.83118
0.24116	0.3128		0.61683	0.99115		0.31986	0.2099		0.92797	0.021537		0.49753	0.20816		0.77748	0.80902
0.24141	0.30939		0.65177	0.99099		0.34649	0.21048		0.92755	0.021583		0.45214	0.25666		0.79315	0.8586
0.24167	0.34827		0.65917	0.99082		0.33662	0.21087		0.92712	0.021625		0.31413	0.16664		0.82709	0.78435
0.24168	0.30749		0.59381	0.99052		0.29563	0.2109		0.92672	0.02173		0.276	0.21691		0.74209	0.64345
0.24201	0.30973		0.58657	0.99048		0.3689	0.21127		0.92631	0.022106		0.29642	0.13836		0.74816	0.66405
0.24219	0.28277		0.6387	0.99038		0.30425	0.21157		0.92602	0.02225		0.33664	0.15513		0.70724	0.77853
0.2424	0.25528		0.56586	0.9901		0.26068	0.212		0.92594	0.022274		0.64075	0.17598		0.80467	0.8178
0.24271	0.30978		0.56563	0.99		0.20157	0.2123		0.92543	0.022362		0.6387	0.18028		0.76517	0.7672
0.24305	0.21684		0.59272	0.98998		0.31309	0.21307		0.92458	0.022366		0.76906	0.20333		0.72489	0.75543
0.24423	0.19639		0.60303	0.98978		0.19256	0.21316		0.92424	0.022378		0.76434	0.27616		0.76081	0.59307
0.2446	0.31227		0.56167	0.98961		0.20473	0.21372		0.92367	0.022422		0.71581	0.1896		0.78879	0.80806
0.24512	0.26066		0.56652	0.98954		0.20642	0.21395		0.92349	0.022439		0.66675	0.16716		0.76256	0.71078
0.24527	0.25874		0.55543	0.98803		0.26639	0.21479		0.92298	0.022525		0.69464	0.21463		0.81172	0.75772
0.24533	0.30579		0.65797	0.98792		0.18507	0.21519		0.92266	0.022666		0.70028	0.19247		0.79422	0.91288
0.24538	0.30061		0.66808	0.9877		0.28624	0.21636		0.92141	0.022842		0.7575	0.22974		0.89119	0.76266
0.2455	0.30715		0.55105	0.98742		0.23165	0.2171		0.92106	0.022928		0.76809	0.25331		0.77005	0.74014
0.24593	0.31597		0.60482	0.98673		0.37967	0.21747		0.92023	0.023048		0.74746	0.31928		0.78108	0.67537
0.24618	0.30835		0.51399	0.98644		0.22285	0.21759		0.92008	0.023377		0.72744	0.19394		0.76566	0.61147
0.24726	0.23834		0.61727	0.9864		0.2117	0.21796		0.91958	0.023484		0.70019	0.23828		0.73235	0.78415
0.24804	0.29932		0.50837	0.98608		0.17071	0.21849		0.91957	0.023532		0.806	0.13698		0.78176	0.73993
0.24811	0.23748		0.51413	0.98566		0.20668	0.21854		0.91952	0.023561		0.7674	0.12996		0.84518	0.86368
0.24869	0.30246		0.54611	0.98545		0.21245	0.21874		0.91951	0.023626		0.69098	0.17563		0.79646	0.68991
0.24912	0.30823		0.70627	0.9853		0.35385	0.21899		0.91939	0.023682		0.54101	0.27511		0.73779	0.68965
0.24917	0.17837		0.63789	0.98518		0.46319	0.21961		0.91835	0.024062		0.47755	0.21673		0.72788	0.88292
0.24926	0.26122		0.61721	0.98465		0.12448	0.21999		0.91817	0.02408		0.66578	0.2115		0.7505	0.624
0.24959	0.1375		0.69881	0.98432		0.25261	0.22179		0.91804	0.024131		0.65143	0.21613		0.77208	0.68477
0.24995	0.29292		0.58514	0.98431		0.17923	0.22183		0.91759	0.024294		0.44703	0.22843		0.7834	0.77619
0.25112	0.25431		0.71728	0.98392		0.43293	0.22199		0.91639	0.024597		0.49446	0.25265		0.7353	0.69456
0.25148	0.12772		0.65915	0.98361		0.23646	0.22205		0.91487	0.024746		0.68367	0.18102		0.77882	0.71885
0.25158	0.26476		0.60032	0.9836		0.43463	0.22268		0.9142	0.024769		0.62286	0.1564		0.69959	0.61143
0.2518	0.35353		0.50221	0.98354		0.28213	0.22272		0.91408	0.025222		0.59019	0.16676		0.77013	0.33635
0.25188	0.26205		0.55677	0.98344		0.28077	0.22412		0.91243	0.025352		0.6704	0.20094		0.79539	0.6367
0.25218	0.25153		0.63212	0.98343		0.28108	0.22513		0.91235	0.02542		0.67926	0.20125		0.75775	0.61375
0.25231	0.1523		0.60869	0.98277		0.27883	0.22733		0.9123	0.025598		0.47756	0.14684		0.75939	0.78267
0.25234	0.30318		0.73955	0.98254		0.29272	0.22845		0.9122	0.02561		0.46449	0.18191		0.8445	0.76279
0.25254	0.22657		0.6618	0.98246		0.24559	0.22849		0.91196	0.025709		0.69763	0.21757		0.82829	0.80436
0.25317	0.29869		0.60335	0.98199		0.22602	0.22857		0.91103	0.025888		0.65612	0.21985		0.80258	0.69065
0.25319	0.25238		0.57277	0.98155		0.19743	0.229		0.91082	0.026071		0.70162	0.15439		0.84105	0.63945
0.25359	0.33746		0.55932	0.98147		0.17293	0.22929		0.91064	0.026124		0.73768	0.25013		0.81335	0.62109
0.25407	0.33102		0.64883	0.98142		0.26777	0.23087		0.90965	0.026155		0.72916	0.21049		0.7446	0.80904
0.25417	0.37375		0.64353	0.98135		0.2932	0.23121		0.90947	0.026201		0.73989	0.22312		0.7847	0.76469
0.25431	0.43599		0.70305	0.98121		0.28705	0.23138		0.90894	0.026427		0.67858	0.16649		0.76207	0.90883
0.25461	0.48661		0.66959	0.98105		0.2166	0.23146		0.9074	0.026623		0.69297	0.27703		0.77231	0.77019
0.25486	0.20684		0.66685	0.9809		0.23388	0.23203		0.907	0.027046		0.61366	0.31261		0.68393	0.57477
0.25506	0.29951		0.56701	0.98083		0.3147	0.23209		0.90609	0.027247		0.72401	0.11914		0.79845	0.5921
0.2554	0.42274		0.62464	0.98058		0.42916	0.23213		0.90569	0.027298		0.66908	0.20037		0.83742	0.45127
0.25543	0.27849		0.68705	0.9804		0.30427	0.23239		0.90465	0.027804		0.58661	0.26177		0.69995	0.49405
0.25617	0.28333		0.59674	0.98035		0.34806	0.23273		0.90422	0.027873		0.6505	0.25283		0.60846	0.65422
0.25637	0.25027		0.65053	0.98029		0.29868	0.23294		0.90373	0.028353		0.60003	0.12408		0.68857	0.57768
0.25662	0.31336		0.65508	0.98029		0.32999	0.23316		0.903	0.029162		0.68553	0.158		0.49917	0.56961
0.25673	0.31399		0.57714	0.98015		0.36679	0.23326		0.90155	0.029459		0.73433	0.15436		0.50717	0.44543
0.25694	0.2679		0.5434	0.98009		0.25891	0.23333		0.90045	0.029976		0.69099	0.13191		0.60654	0.34194
0.25697	0.30755		0.66328	0.97986		0.27523	0.23334		0.89905	0.030281		0.64983	0.26634		0.60144	0.52535
0.25698	0.19177		0.65028	0.97963		0.26905	0.2336		0.89842	0.030671		0.70143	0.30886		0.63813	0.54409
0.25736	0.26586		0.62173	0.97903		0.23522	0.23429		0.8979	0.030808		0.71443	0.29634		0.57335	0.45175
0.25743	0.28193		0.65225	0.97892		0.23692	0.23449		0.89714	0.031401		0.65934	0.30637		0.67924	0.49408
0.25786	0.21829		0.61979	0.97831		0.21064	0.23475		0.897	0.031611		0.57868	0.28706		0.74296	0.61121
0.25797	0.30582		0.68518	0.9781		0.2083	0.23525		0.89677	0.031646		0.67966	0.25203		0.58519	0.56697
0.25822	0.19381		0.70035	0.97785		0.31593	0.23609		0.8964	0.031702		0.74031	0.12068		0.51074	0.5341
0.25844	0.28579		0.64301	0.97775		0.26882	0.2366		0.89577	0.031832		0.67733	0.32511		0.64828	0.50488
0.2597	0.232		0.56343	0.97741		0.27756	0.23664		0.89546	0.032185		0.68377	0.31895		0.76401	0.50335
0.26019	0.2559		0.62681	0.9774		0.2501	0.23734		0.89478	0.032288		0.54792	0.25911		0.74283	0.55543
0.26039	0.21499		0.63225	0.97709		0.22319	0.23773		0.89389	0.032355		0.61631	0.26417		0.8066	0.54131
0.26067	0.33063		0.68681	0.97676		0.24741	0.23838		0.8934	0.032484		0.5751	0.27825		0.83347	0.60323
0.26107	0.25551		0.65721	0.97662		0.20131	0.23849		0.89323	0.032552		0.47266	0.17958		0.67211	0.49713
0.26155	0.26309		0.65738	0.97611		0.41805	0.23889		0.8917	0.032929		0.48984	0.099003		0.8436	0.51812
0.26163	0.21531		0.6301	0.97595		0.30537	0.23894		0.89159	0.033308		0.58092	0.17464		0.75698	0.4905
0.26178	0.30799		0.62404	0.97592		0.2279	0.23976		0.89138	0.033505		0.58687	0.19254		0.65944	0.65282
0.26258	0.27898		0.73744	0.97571		0.2399	0.23982		0.89072	0.033754		0.59854	0.1077		0.79603	0.49324
0.26296	0.33428		0.65128	0.97546		0.20797	0.23988		0.89009	0.034629		0.50049	0.21652		0.79904	0.68189
0.26296	0.27687		0.63696	0.97541		0.2689	0.23988		0.88986	0.034987		0.6437	0.24764		0.76564	0.64625
0.26311	0.35526		0.6258	0.9754		0.1663	0.24076		0.88823	0.035344		0.68918	0.16811		0.75175	0.53565
0.26327	0.26177		0.65738	0.97525		0.19172	0.24227		0.88772	0.035997		0.55994	0.22427		0.80543	0.61164
0.26347	0.27073		0.64432	0.97472		0.20796	0.24232		0.88712	0.037215		0.6863	0.21903		0.71433	0.4953
0.26356	0.2801		0.6017	0.97434		0.24319	0.24298		0.887	0.03759		0.48097	0.2319		0.76569	0.49183
0.26572	0.37492		0.5662	0.97413		0.30346	0.243		0.88664	0.038312		0.56014	0.28019		0.69993	0.50568
0.26614	0.28824		0.6024	0.97411		0.27544	0.24365		0.88655	0.038326		0.40362	0.21627		0.7555	0.57672
0.26638	0.30184		0.64091	0.97402		0.32547	0.24376		0.88641	0.039901		0.65181	0.23276		0.78658	0.61434
0.26785	0.22392		0.6848	0.97389		0.23636	0.2438		0.8862	0.040203		0.72448	0.35313		0.72002	0.48901
0.26787	0.19356		0.65516	0.97366		0.31563	0.24459		0.88614	0.040302		0.7164	0.20683		0.77612	0.57838
0.26831	0.32071		0.69856	0.97359		0.31485	0.24467		0.88563	0.040435		0.51595	0.15972		0.76285	0.50454
0.26895	0.28165		0.62291	0.97359		0.24426	0.24475		0.88533	0.041914		0.55776	0.22399		0.76084	0.48109
0.26913	0.2898		0.55528	0.97346		0.38063	0.24534		0.88468	0.042367		0.53505	0.23549		0.80219	0.57134
0.26962	0.33963		0.66507	0.9732		0.24417	0.24543		0.88417	0.04255		0.64017	0.1163		0.69103	0.67746
0.26985	0.27753		0.57851	0.97261		0.21728	0.2468		0.88296	0.042618		0.49256	0.11452		0.70142	0.46471
0.26995	0.30992		0.65079	0.97199		0.30684	0.24707		0.88288	0.04273		0.55075	0.22968		0.7521	0.5112
0.26996	0.26696		0.60938	0.97193		0.3341	0.24755		0.88263	0.04274		0.48536	0.36155		0.78306	0.5688
0.27006	0.2582		0.57709	0.97179		0.27779	0.24756		0.8825	0.043566		0.67092	0.1655		0.7065	0.52466
0.27013	0.31561		0.69529	0.97138		0.25112	0.2483		0.88224	0.043772		0.5258	0.23377		0.83781	0.5182
0.2708	0.2649		0.53446	0.97133		0.336	0.24831		0.88179	0.044516		0.8042	0.062335		0.72506	0.5147
0.27084	0.2202		0.75699	0.97132		0.3138	0.24879		0.88116	0.044894		0.69985	0.16195		0.75694	0.55782
0.2709	0.30198		0.57625	0.97129		0.32329	0.24882		0.88092	0.045235		0.83966	0.17601		0.77993	0.77154
0.27122	0.30198		0.66826	0.97104		0.3182	0.24933		0.88088	0.045584		0.57782	0.29536		0.76604	0.87557
0.27184	0.29004		0.70477	0.97081		0.26465	0.2494		0.88079	0.045697		0.54091	0.22833		0.82423	0.82888
0.27208	0.2626		0.62124	0.97077		0.32203	0.2494		0.88056	0.04891		0.70614	0.31711		0.73512	0.84946
0.2722	0.35808		0.53661	0.97073		0.36341	0.24945		0.88035	0.050288		0.54492	0.20759		0.78612	0.90678
0.27258	0.21023		0.56338	0.97049		0.24755	0.24969		0.87949	0.050473		0.56466	0.20276		0.80752	0.7882
0.27263	0.24764		0.63365	0.97038		0.21391	0.25028		0.87888	0.050603		0.54171	0.28703		0.76658	0.87647
0.27263	0.32257		0.67006	0.97014		0.27611	0.25062		0.87783	0.051157		0.58951	0.17975		0.79543	0.82982
0.27294	0.30709		0.65858	0.96978		0.32981	0.25082		0.87773	0.051204		0.42323	0.1733		0.74377	0.87888
0.27304	0.28734		0.68276	0.96977		0.25885	0.25091		0.8775	0.054474		0.58821	0.19797		0.78564	0.6165
0.27341	0.29853		0.60009	0.96955		0.30981	0.25107		0.87605	0.054504		0.60796	0.27816		0.83788	0.91051
0.27392	0.25291		0.65483	0.96952		0.31995	0.25158		0.87599	0.055002		0.60346	0.19249		0.82529	0.84955
0.27392	0.28498		0.68519	0.96937		0.28835	0.25203		0.87588	0.055371		0.62003	0.16605		0.74986	0.93855
0.27409	0.41229		0.66245	0.96935		0.34519	0.25321		0.87402	0.05552		0.66395	0.24329		0.79785	0.90934
0.27478	0.33534		0.61933	0.96908		0.25332	0.25362		0.87396	0.056441		0.51771	0.2043		0.80946	0.88964
0.27483	0.29627		0.63192	0.96875		0.2836	0.25385		0.87381	0.057077		0.64965	0.25179		0.82781	0.78978
0.27504	0.38614		0.60396	0.96873		0.3294	0.25414		0.87263	0.058801		0.66059	0.22911		0.82241	0.93316
0.27518	0.27936		0.60214	0.96857		0.27963	0.25485		0.87162	0.059567		0.68835	0.26671		0.81594	0.9214
0.27543	0.18894		0.62831	0.96854		0.37748	0.25499		0.87024	0.05966		0.51313	0.19468		0.72097	0.91549
0.27569	0.33106		0.73972	0.96837		0.2418	0.25577		0.87016	0.063065		0.49582	0.21876		0.78711	0.95387
0.27581	0.31948		0.66905	0.96825		0.35837	0.25604		0.87008	0.064298		0.67909	0.26992		0.72238	0.846
0.27643	0.24804		0.5841	0.96774		0.26173	0.25608		0.86965	0.064765		0.47611	0.28175		0.79323	0.91451
0.27653	0.19315		0.59808	0.96755		0.28855	0.25612		0.8689	0.065663		0.45907	0.24346		0.83433	0.84608
0.27692	0.28722		0.60827	0.96752		0.33342	0.25634		0.86886	0.066336		0.55852	0.097777		0.80597	0.77476
0.27699	0.30326		0.63082	0.96737		0.35133	0.2572		0.86842	0.066637		0.64245	0.18195		0.81044	0.92137
0.27725	0.26608		0.48254	0.96708		0.38089	0.25772		0.86834	0.066902		0.44272	0.41298		0.80302	0.84246
0.27757	0.28362		0.47051	0.96678		0.33166	0.25772		0.86747	0.068002		0.4231	0.34335		0.83937	0.94792
0.27768	0.29833		0.48681	0.96637		0.35103	0.25877		0.86734	0.068292		0.48218	0.32792		0.71465	0.8323
0.27817	0.34011		0.57896	0.96635		0.32047	0.25914		0.86731	0.068527		0.55313	0.3507		0.80781	0.84778
0.27827	0.24334		0.6223	0.9662		0.20563	0.25939		0.8672	0.069024		0.49295	0.19848		0.78467	0.92547
0.27832	0.27549		0.62565	0.96615		0.34869	0.25941		0.86701	0.069535		0.51339	0.22191		0.75307	0.97411
0.27846	0.26868		0.5563	0.96582		0.29551	0.26049		0.86684	0.069537		0.47564	0.30624		0.7525	0.9098
0.27851	0.36664		0.61012	0.96579		0.24209	0.26111		0.86655	0.069851		0.51873	0.25157		0.90312	0.95855
0.27859	0.2854		0.62514	0.9654		0.33527	0.26167		0.86634	0.069876		0.4169	0.14929		0.81286	0.94043
0.27871	0.27684		0.5574	0.96539		0.33958	0.26172		0.86624	0.06992		0.40214	0.21826		0.7216	0.93757
0.27876	0.22918		0.52458	0.96487		0.38642	0.262		0.86512	0.070686		0.56063	0.23883		0.77693	0.85146
0.27906	0.33541		0.6053	0.96477		0.32721	0.26211		0.86506	0.071091		0.56156	0.21318		0.75995	0.88273
0.2799	0.21817		0.62457	0.96433		0.28675	0.26215		0.86422	0.071333		0.54948	0.29484		0.80702	0.8812
0.2801	0.2772		0.62412	0.96419		0.36925	0.26217		0.86376	0.071491		0.48017	0.25173		0.80674	0.85151
0.2807	0.33596		0.57165	0.96392		0.3178	0.26232		0.86368	0.071984		0.45774	0.27883		0.75453	0.84407
0.28086	0.31033		0.6027	0.96345		0.51966	0.26244		0.86284	0.072683		0.37562	0.32747		0.68848	0.78996
0.28119	0.3034		0.65361	0.96338		0.39451	0.26277		0.86204	0.07288		0.63878	0.32776		0.86226	0.85293
0.28122	0.33109		0.63816	0.96325		0.46518	0.26289		0.86119	0.073078		0.40816	0.30144		0.81574	0.80048
0.28189	0.29425		0.60031	0.96308		0.46494	0.26297		0.86116	0.073098		0.50616	0.36074		0.83427	0.8309
0.28193	0.26096		0.54188	0.96291		0.53909	0.26376		0.86043	0.073415		0.62496	0.30796		0.70015	0.92437
0.28222	0.32759		0.56087	0.96268		0.46782	0.26409		0.86005	0.073567		0.54261	0.29833		0.81568	0.97338
0.28325	0.23722		0.63352	0.96263		0.35191	0.26414		0.85913	0.073706		0.57331	0.15493		0.72108	0.8601
0.2836	0.33779		0.60711	0.96248		0.4809	0.26526		0.85878	0.074115		0.54129	0.19594		0.75797	0.89366
0.28378	0.3218		0.60437	0.96244		0.4831	0.26529		0.85861	0.074363		0.48545	0.33156		0.67904	0.84762
0.2839	0.32368		0.62719	0.96228		0.41406	0.26544		0.8584	0.075142		0.54212	0.26873		0.77526	0.91668
0.28459	0.25474		0.62583	0.96198		0.48458	0.266		0.8577	0.075423		0.49753	0.35322		0.82794	0.84748
0.28483	0.2343		0.58115	0.96196		0.42915	0.2661		0.85741	0.075469		0.4647	0.83056		0.85192	0.91468
0.28543	0.28275		0.66182	0.96187		0.40671	0.26647		0.85733	0.076238		0.43843	0.88902		0.87125	0.90372
0.28549	0.27626		0.6204	0.96175		0.47132	0.26715		0.85727	0.077044		0.41013	0.77488		0.86333	0.93191
0.28607	0.24435		0.60247	0.96167		0.50072	0.26741		0.85725	0.077094		0.66275	0.66142		0.82803	0.95383
0.2861	0.36844		0.53695	0.96159		0.51904	0.26791		0.85643	0.077664		0.68334	0.39013		0.80407	0.91989
0.2864	0.22499		0.62346	0.96136		0.41829	0.26844		0.85563	0.078194		0.47983	0.40506		0.82345	0.9539
0.28673	0.27486		0.65832	0.96128		0.42055	0.26887		0.85487	0.078615		0.43963	0.43038		0.70759	0.85101
0.2868	0.41659		0.61951	0.96081		0.50184	0.26937		0.85473	0.078774		0.47008	0.48358		0.81096	0.89771
0.28684	0.417		0.62952	0.96076		0.49349	0.26938		0.85435	0.080858		0.39591	0.59608		0.84632	0.86668
0.28686	0.27896		0.51347	0.96046		0.53414	0.26964		0.85431	0.081087		0.45075	0.40695		0.77724	0.87114
0.2869	0.32188		0.6301	0.96035		0.34251	0.27079		0.85394	0.081184		0.50055	0.39696		0.81948	0.90216
0.28738	0.26923		0.62868	0.96018		0.41249	0.27156		0.85375	0.08165		0.44588	0.39805		0.95894	0.8789
0.28748	0.27049		0.51348	0.96012		0.5066	0.27162		0.85369	0.081966		0.31058	0.42303		0.83474	0.92611
0.28789	0.2928		0.60007	0.96007		0.45165	0.27184		0.85346	0.08199		0.3693	0.48997		0.92656	0.91631
0.28795	0.28757		0.64589	0.95974		0.35721	0.27186		0.85289	0.08216		0.35785	0.51318		0.79047	0.54183
0.28807	0.31889		0.57844	0.95954		0.46757	0.27194		0.85212	0.083164		0.2819	0.51053		0.9064	0.90534
0.28832	0.37636		0.76323	0.95951		0.41927	0.27269		0.85174	0.083813		0.35932	0.53751		0.80948	0.89866
0.28852	0.41847		0.7339	0.95933		0.43754	0.27281		0.85156	0.084346		0.34432	0.39658		0.87332	0.86334
0.28886	0.25774		0.74975	0.95917		0.39475	0.27337		0.85133	0.084679		0.37702	0.32673		0.76213	0.87717
0.28978	0.30367		0.67974	0.95912		0.51007	0.27378		0.85103	0.084799		0.33541	0.39569		0.83989	0.94174
0.29003	0.29391		0.59573	0.95906		0.44091	0.27402		0.8507	0.084915		0.40207	0.39138		0.79918	0.90995
0.29015	0.38261		0.73059	0.95891		0.46853	0.27456		0.85061	0.084926		0.38498	0.32274		0.86578	0.96443
0.29085	0.38397		0.74621	0.95877		0.42699	0.27475		0.84996	0.085315		0.39839	0.36145		0.91091	0.96866
0.29097	0.35354		0.62313	0.95876		0.51894	0.27525		0.84924	0.085985		0.47448	0.3573		0.78722	0.89888
0.29127	0.30153		0.67925	0.95811		0.4437	0.27527		0.84907	0.086136		0.58334	0.54781		0.90659	0.92649
0.29281	0.65398		0.66649	0.9576		0.38886	0.27528		0.84901	0.086529		0.48412	0.52201		0.90598	0.806
0.29323	0.62637		0.70848	0.9576		0.47532	0.27559		0.84858	0.086839		0.54374	0.51882		0.88356	0.9548
0.29352	0.71241		0.75451	0.95742		0.41762	0.27579		0.84849	0.086958		0.76133	0.37181		0.8598	0.8859
0.29437	0.53408		0.68653	0.95666		0.47459	0.27604		0.84834	0.087367		0.65077	0.35577		0.89901	1.0016
0.29464	0.56983		0.68454	0.95654		0.45976	0.27779		0.84767	0.087958		0.65967	0.36249		0.84209	0.90926
0.29468	0.75777		0.71704	0.95647		0.41723	0.27856		0.84746	0.088219		0.64234	0.41962		0.80147	0.88593
0.29469	0.58334		0.69045	0.95618		0.38385	0.27898		0.84726	0.088346		0.72211	0.55793		0.90018	0.74406
0.29473	0.63436		0.6868	0.95526		0.4443	0.27949		0.84536	0.088689		0.81026	0.36671		0.83695	0.9093
0.29476	0.75041		0.73586	0.95512		0.4814	0.27996		0.84499	0.089272		0.66235	0.36203		0.8786	0.89181
0.29491	0.43186		0.65254	0.955		0.39434	0.27997		0.84492	0.089553		0.68399	0.23157		0.89055	0.96319
0.29494	0.097665		0.75484	0.95491		0.46482	0.28002		0.84472	0.090034		0.84327	0.23447		0.82852	0.86815
0.29504	0.62664		0.76179	0.9548		0.53598	0.28055		0.84457	0.090397		0.87817	0.3781		0.87615	0.89635
0.29521	0.55573		0.72259	0.9546		0.51204	0.28073		0.84382	0.091139		0.8359	0.32541		0.89975	0.85588
0.29543	0.70805		0.78011	0.95421		0.48304	0.28076		0.84378	0.091313		0.87861	0.34111		0.85188	0.83597
0.29612	0.65389		0.70553	0.95421		0.40713	0.2811		0.84369	0.091314		0.89246	0.28863		0.84076	0.87028
0.29728	0.71105		0.73958	0.95376		0.48833	0.28144		0.84214	0.091457		0.81146	0.51896		0.86628	0.98443
0.29736	0.68815		0.68192	0.95359		0.60157	0.28184		0.84174	0.091838		0.75352	0.46048		0.81074	0.90365
0.29741	0.66326		0.75053	0.95332		0.41909	0.28191		0.84168	0.092068		0.66121	0.59061		0.80633	0.81085
0.29768	0.60035		0.77541	0.95324		0.46808	0.28237		0.84154	0.092096		0.58704	0.59118		0.96016	0.91442
0.29784	0.53991		0.766	0.95283		0.37439	0.28237		0.84142	0.092294		0.67312	0.29374		0.83829	0.87178
0.29808	0.54391		0.68956	0.95277		0.41029	0.28245		0.84136	0.092446		0.7137	0.26194		0.90741	0.86478
0.2983	0.59475		0.70554	0.95226		0.39818	0.28252		0.84133	0.092491		0.66101	0.2492		0.79513	0.85587
0.29842	0.64579		0.68631	0.95201		0.48879	0.28281		0.84128	0.092577		0.76315	0.26751		0.86564	0.71021
0.29904	0.65136		0.77896	0.95182		0.47536	0.2829		0.84073	0.092724		0.80414	0.25371		0.90612	0.89043
0.3002	0.50789		0.69585	0.9518		0.37655	0.28306		0.84021	0.09284		0.7582	0.60842		0.88127	0.82553
0.30025	0.57049		0.66111	0.95172		0.40605	0.2835		0.84003	0.093006		0.69584	0.78607		0.78914	0.80696
0.30038	0.62825		0.73001	0.95162		0.48176	0.28384		0.83993	0.094685		0.7583	0.75967		0.74528	0.82854
0.30077	0.59235		0.67728	0.95156		0.48478	0.2847		0.83982	0.095016		0.66463	0.63412		0.74245	0.91887
0.30112	0.68778		0.67967	0.95125		0.37505	0.28497		0.83943	0.096115		0.7657	0.17776		0.7944	0.82621
0.30118	0.59258		0.63657	0.95108		0.46341	0.2851		0.8392	0.096216		0.52198	0.13891		0.78821	0.84418
0.30125	0.69692		0.68447	0.95089		0.48507	0.28571		0.839	0.096339		0.86907	0.18986		0.82307	0.85291
0.30144	0.52894		0.71554	0.9505		0.3485	0.28589		0.83866	0.096465		0.80977	0.13031		0.83708	0.79183
0.30182	0.66361		0.77452	0.95011		0.47853	0.28597		0.83847	0.097207		0.6188	0.15676		0.81609	0.80835
0.30184	0.58357		0.81648	0.9498		0.41449	0.28735		0.83838	0.097307		0.57445	0.16427		0.84547	0.82578
0.30194	0.51179		0.78577	0.94944		0.45169	0.28779		0.83715	0.097425		0.63178	0.14158		0.84525	0.776
0.30205	0.58582		0.68188	0.94891		0.40566	0.28784		0.83652	0.097513		0.56042	0.13137		0.7817	0.84869
0.30215	0.51938		0.70401	0.94866		0.39397	0.28836		0.83617	0.097652		0.63193	0.11868		0.73436	0.91313
0.30238	0.55284		0.68422	0.94847		0.49352	0.28847		0.83614	0.098342		0.47353	0.17042		0.84704	0.86105
0.30251	0.60463		0.773	0.94811		0.47268	0.28971		0.8361	0.0987		0.55392	0.3317		0.8073	0.76122
0.30254	0.66349		0.67178	0.94806		0.33817	0.28979		0.83555	0.098786		0.61854	0.23793		0.75795	0.83422
0.30287	0.51598		0.6723	0.94803		0.45938	0.29011		0.83462	0.09884		0.62865	0.15492		0.78676	0.82135
0.30311	0.51666		0.72119	0.94791		0.56466	0.29045		0.83398	0.099153		0.7138	0.20052		0.72968	0.86662
0.30326	0.54005		0.70865	0.94772		0.74101	0.29066		0.83359	0.099228		0.63607	0.45377		0.85664	0.82032
0.3038	0.4699		0.6725	0.94738		0.44805	0.29138		0.83339	0.099352		0.50972	0.52206		0.80479	0.80712
0.30487	0.7106		0.70406	0.94692		0.36663	0.29172		0.83301	0.099693		0.62216	0.62682		0.85202	0.81471
0.30503	0.46237		0.65638	0.94663		0.41567	0.29193		0.83275	0.099794		0.64751	0.2435		0.90572	0.74521
0.30516	0.54686		0.73731	0.94658		0.49523	0.29196		0.83172	0.10026		0.59279	0.22258		0.8367	0.83431
0.30524	0.62531		0.73057	0.94642		0.465	0.29207		0.8317	0.1005		0.7059	0.33803		0.81914	0.83987
0.30524	0.66685		0.67035	0.94605		0.4239	0.29245		0.83154	0.10082		0.6539	0.65239		0.76597	0.79382
0.30536	0.57033		0.71171	0.94584		0.31267	0.2928		0.83143	0.10096		0.67507	0.59808		0.79692	0.81612
0.30581	0.63391		0.71722	0.94541		0.45973	0.29287		0.8314	0.1011		0.63872	0.58357		0.85296	0.90856
0.30655	0.56603		0.72038	0.94534		0.45727	0.29307		0.83122	0.10115		0.58425	0.72892		0.81068	0.82152
0.30655	0.47247		0.72544	0.94494		0.43753	0.29316		0.83067	0.10124		0.63265	0.4896		0.86371	0.77856
0.3069	0.63437		0.67654	0.94488		0.49948	0.29336		0.83066	0.10175		0.49863	0.5164		0.84717	0.87053
0.30716	0.49694		0.6939	0.94479		0.41817	0.29345		0.83066	0.10212		0.46943	0.57653		0.65475	0.82178
0.30829	0.56443		0.6944	0.94471		0.39836	0.2935		0.83056	0.10223		0.58597	0.47328		0.78588	0.79569
0.30898	0.68274		0.68662	0.94454		0.3721	0.29365		0.83043	0.10224		0.57297	0.39793		0.82827	0.85285
0.30977	0.57549		0.73055	0.94317		0.42599	0.29373		0.8303	0.10259		0.40669	0.4522		0.75151	0.83421
0.30979	0.39432		0.77136	0.94278		0.39665	0.294		0.83029	0.10259		0.38345	0.27791		0.69666	0.81224
0.31017	0.46316		0.63703	0.94276		0.37322	0.29413		0.83027	0.10295		0.3918	0.28369		0.87294	0.86506
0.31046	0.75589		0.72351	0.94241		0.32051	0.2949		0.83024	0.10334		0.40936	0.54902		0.75839	0.80693
0.3107	0.60131		0.67215	0.94223		0.36968	0.29543		0.83018	0.10349		0.71582	0.68903		0.74131	0.89268
0.31078	0.51326		0.70658	0.94202		0.39831	0.29616		0.8301	0.10363		0.5969	0.66576		0.80986	0.84506
0.31087	0.40274		0.7034	0.94106		0.48698	0.29672		0.82994	0.1045		0.55447	0.65009		0.7876	0.77445
0.31104	0.44052		0.77571	0.94059		0.48251	0.29681		0.82994	0.10455		0.70283	0.69553		0.79839	0.79671
0.31123	0.49904		0.67034	0.94051		0.42389	0.29711		0.82941	0.10489		0.64351	0.65708		0.80367	0.86785
0.31145	0.42319		0.52876	0.94027		0.41751	0.29737		0.8292	0.10506		0.59411	0.73925		0.76164	0.81658
0.31154	0.62835		0.63401	0.94019		0.46826	0.29792		0.82904	0.10542		0.63842	0.63014		0.76309	0.87777
0.31183	0.50789		0.62759	0.93997		0.35879	0.29803		0.82819	0.1061		0.56309	0.69599		0.80581	0.82532
0.3127	0.59542		0.56631	0.93995		0.3747	0.29819		0.82812	0.10615		0.6489	0.68582		0.73037	0.84464
0.3128	0.63153		0.65264	0.93993		0.39848	0.29823		0.82741	0.10625		0.68897	0.65558		0.71067	0.90387
0.31283	0.56224		0.677	0.93988		0.47753	0.29864		0.82738	0.10632		0.47666	0.70388		0.84572	0.81037
0.31293	0.51638		0.64062	0.93983		0.46686	0.29972		0.82734	0.1068		0.49875	0.63219		0.86269	0.75693
0.31316	0.69581		0.61557	0.93956		0.35548	0.30057		0.82694	0.10724		0.4252	0.73008		0.78325	0.75639
0.31318	0.65644		0.56624	0.9393		0.4911	0.30105		0.8267	0.10754		0.38497	0.6693		0.73297	0.82215
0.3135	0.67157		0.69818	0.93915		0.48218	0.30135		0.82652	0.10755		0.33604	0.61123		0.82467	0.8434
0.3135	0.54802		0.59127	0.93907		0.44394	0.30183		0.82592	0.10813		0.45194	0.66335		0.88917	0.85185
0.31398	0.6171		0.60525	0.93867		0.419	0.30229		0.82563	0.10829		0.70382	0.50362		0.76696	0.82914
0.31402	0.47821		0.6144	0.93857		0.41632	0.30263		0.82535	0.10881		0.49533	0.49623		0.76681	0.87548
0.31406	0.61889		0.60177	0.93857		0.57324	0.30304		0.82522	0.10894		0.47155	0.65711		0.77621	0.83301
0.31434	0.67693		0.58124	0.93856		0.38622	0.30321		0.82518	0.10957		0.49169	0.4131		0.83297	0.79738
0.31434	0.25907		0.62687	0.93812		0.29994	0.30322		0.82516	0.10982		0.48687	0.58873		0.79123	0.79945
0.31457	0.1736		0.59146	0.93807		0.46106	0.30334		0.82493	0.10987		0.42489	0.46241		0.75937	0.78897
0.31497	0.28068		0.6034	0.93719		0.39867	0.30389		0.82411	0.11005		0.38886	0.41293		0.88008	0.75459
0.31531	0.23834		0.6164	0.93707		0.54515	0.30487		0.82408	0.11044		0.59244	0.36307		0.8398	0.73618
0.31561	0.13128		0.65914	0.93673		0.38275	0.3056		0.82398	0.11102		0.6883	0.32809		0.8293	0.70312
0.31588	0.20136		0.62741	0.93672		0.38385	0.30568		0.82263	0.11116		0.35803	0.37587		0.81924	0.74471
0.31604	0.22111		0.55709	0.93658		0.57773	0.30623		0.82207	0.11129		0.67981	0.39422		0.75974	0.87134
0.31616	0.24006		0.65469	0.93643		0.45684	0.30682		0.82201	0.1113		0.9066	0.37753		0.82677	0.80925
0.31622	0.25877		0.60409	0.93628		0.48947	0.3072		0.82155	0.1114		0.91904	0.3156		0.69042	0.82414
0.31669	0.17798		0.59659	0.93628		0.57878	0.30724		0.82103	0.11164		0.94134	0.40438		0.76427	0.92303
0.31776	0.27656		0.63587	0.93609		0.46889	0.30734		0.82071	0.11182		0.58048	0.33141		0.85313	0.37254
0.31793	0.30153		0.6379	0.93594		0.46814	0.30741		0.82031	0.11186		0.55183	0.30629		0.70587	0.39907
0.31813	0.23789		0.5869	0.93589		0.46327	0.30743		0.81984	0.11215		0.44913	0.40267		0.66627	0.3898
0.31829	0.31337		0.6309	0.9357		0.42354	0.30796		0.81946	0.11294		0.5132	0.30558		0.81667	0.40717
0.31847	0.32424		0.68628	0.93531		0.27196	0.30803		0.81945	0.11294		0.439	0.34285		0.81121	0.40239
0.31863	0.3344		0.62903	0.93515		0.45227	0.30814		0.81932	0.11336		0.49344	0.35678		0.7601	0.48742
0.31868	0.22506		0.63994	0.93507		0.34058	0.30838		0.81925	0.11343		0.58264	0.33309		0.7897	0.36059
0.31871	0.20961		0.53251	0.93501		0.52351	0.30885		0.81903	0.11347		0.4904	0.26069		0.74071	0.42818
0.31881	0.17532		0.68477	0.93482		0.63732	0.30906		0.81843	0.11374		0.54838	0.35942		0.73295	0.29903
0.31883	0.2968		0.60866	0.93444		0.33674	0.30909		0.81737	0.11381		0.5172	0.24703		0.88388	0.42826
0.31915	0.23955		0.54913	0.9343		0.20984	0.30932		0.81722	0.11394		0.49218	0.32176		0.83165	0.41636
0.31931	0.19765		0.41073	0.93401		0.17274	0.30942		0.81718	0.11406		0.62833	0.41563		0.77763	0.46836
0.3197	0.20103		0.55121	0.93398		0.16969	0.30986		0.81649	0.11485		0.64603	0.2864		0.81155	0.4443
0.31973	0.24581		0.52977	0.93368		0.17382	0.31013		0.81631	0.11491		0.61021	0.39964		0.73307	0.34813
0.31988	0.24628		0.46832	0.93336		0.084633	0.3106		0.81581	0.11501		0.3604	0.3185		0.82221	0.3709
0.32027	0.27949		0.48705	0.93334		0.1183	0.31095		0.81472	0.11508		0.61187	0.29702		0.81766	0.35968
0.32135	0.20474		0.46313	0.93325		0.15902	0.31109		0.81446	0.11508		0.57203	0.34235		0.8001	0.49537
0.32136	0.23294		0.48954	0.93318		0.21496	0.3115		0.81436	0.11601		0.4136	0.26407		0.83264	0.41431
0.32149	0.23933		0.67938	0.93317		0.19105	0.31195		0.81404	0.11643		0.78478	0.39139		0.75625	0.2981
0.32156	0.2394		0.42002	0.93293		0.21689	0.31227		0.81341	0.11666		0.57486	0.35405		0.77522	0.43012
0.32159	0.24862		0.44996	0.93279		0.19316	0.3123		0.81323	0.11704		0.54119	0.47573		0.76497	0.48469
0.32199	0.17967		0.53491	0.93278		0.1857	0.31235		0.81313	0.11713		0.51954	0.36797		0.78009	0.33444
0.32201	0.24009		0.49907	0.9325		0.12504	0.3126		0.81305	0.11719		0.46769	0.35207		0.78665	0.30701
0.32225	0.22048		0.51329	0.93248		0.2557	0.31269		0.81168	0.11724		0.4201	0.39456		0.80589	0.50074
0.32229	0.27358		0.5769	0.93244		0.35419	0.31277		0.81092	0.11729		0.61095	0.40453		0.813	0.46508
0.32247	0.1892		0.60139	0.93225		0.14209	0.31299		0.81085	0.1173		0.65988	0.45063		0.82352	0.33006
0.32256	0.21796		0.6043	0.93133		0.1288	0.31391		0.81085	0.11736		0.58403	0.45873		0.83667	0.41315
0.32288	0.1525		0.53446	0.93113		0.12448	0.31457		0.81058	0.11747		0.73671	0.32995		0.86274	0.40711
0.32314	0.25531		0.56247	0.93074		0.2074	0.31471		0.8103	0.11759		0.7928	0.4		0.84566	0.38608
0.32335	0.2777		0.50545	0.93051		0.21663	0.31483		0.81019	0.11764		0.6293	0.35359		0.81398	0.50257
0.32378	0.30767		0.50821	0.93009		0.36749	0.31563		0.81016	0.11912		0.47957	0.42649		0.68653	0.38511
0.32385	0.17469		0.61116	0.92963		0.37545	0.31566		0.80967	0.11934		0.60408	0.34318		0.83682	0.48844
0.32388	0.20647		0.55735	0.92944		0.30055	0.31615		0.80932	0.11952		0.43157	0.4486		0.83139	0.34974
0.32395	0.21927		0.52963	0.92912		0.19223	0.31629		0.80919	0.1197		0.50912	0.34905		0.70682	0.38706
0.32441	0.21665		0.51258	0.929		0.28053	0.31649		0.80875	0.11995		0.41963	0.37108		0.89506	0.39318
0.32452	0.1087		0.51548	0.92889		0.26305	0.31689		0.80859	0.12032		0.50986	0.34704		0.77117	0.41694
0.32463	0.17229		0.55804	0.92868		0.19602	0.31743		0.80847	0.12054		0.5812	0.44154		0.94859	0.46368
0.32471	0.20202		0.58797	0.92862		0.29311	0.31857		0.80839	0.12061		0.57625	0.41254		0.87628	0.40136
0.32497	0.24847		0.61437	0.92857		0.22916	0.31868		0.80811	0.12098		0.451	0.3133		0.90342	0.37554
0.32529	0.17117		0.44659	0.92844		0.26914	0.31875		0.80771	0.1219		0.573	0.37586		0.75154	0.41417
0.32541	0.15383		0.59289	0.92828		0.32091	0.31918		0.80741	0.12211		0.55335	0.40593		0.8459	0.38484
0.32545	0.15058		0.65271	0.92824		0.67391	0.31932		0.80738	0.12225		0.50956	0.32807		0.69627	0.45925
0.32553	0.21102		0.67905	0.92794		0.71316	0.31947		0.80731	0.12245		0.526	0.28835		0.75684	0.44249
0.32603	0.18302		0.55333	0.92766		0.42242	0.31971		0.80693	0.12274		0.55241	0.45134		0.76961	0.38252
0.3261	0.2404		0.63651	0.9276		0.35602	0.31999		0.80691	0.12295		0.69823	0.4098		0.8052	0.38584
0.32614	0.21417		0.59657	0.92748		0.24389	0.32026		0.80686	0.12308		0.44811	0.35012		0.65349	0.37245
0.32624	0.25682		0.54597	0.9274		0.22905	0.32048		0.80683	0.12309		0.61416	0.49358		0.7914	0.51057
0.32626	0.18538		0.57418	0.92684		0.099478	0.32072		0.80669	0.12319		0.51877	0.39488		0.75753	0.5556
0.32627	0.25106		0.7157	0.92655		0.2682	0.32075		0.80667	0.12355		0.3726	0.23999		0.68738	0.42164
0.32664	0.238		0.67606	0.92648		0.074541	0.32083		0.80662	0.12387		0.55721	0.2748		0.88552	0.33033
0.32698	0.19786		0.5866	0.92625		0.15244	0.32089		0.80651	0.12389		0.54173	0.24844		0.84391	0.43951
0.32714	0.15806		0.65974	0.92608		0.16588	0.32132		0.80623	0.12407		0.61319	0.28653		0.75196	0.45017
0.32726	0.14425		0.677	0.92558		0.1143	0.32132		0.80609	0.12419		0.6423	0.36075		0.78508	0.50476
0.32729	0.25782		0.60867	0.92526		0.064715	0.32211		0.80587	0.12486		0.80648	0.15673		0.90486	0.44361
0.32761	0.17116		0.64524	0.92515		0.36731	0.32231		0.8057	0.12491		0.80304	0.31775		0.85309	0.40249
0.32776	0.16006		0.71059	0.92512		0.41276	0.32241		0.80537	0.12497		0.75991	0.25968		0.84894	0.40888
0.3278	0.29971		0.68555	0.92485		0.24145	0.32276		0.80525	0.12525		0.81043	0.25617		0.8845	0.48477
0.32787	0.12616		0.62541	0.92468		0.3089	0.32304		0.80516	0.12527		0.80827	0.31685		0.8101	0.40498
0.32788	0.25666		0.57738	0.92454		0.28872	0.32338		0.80502	0.12553		0.79613	0.24261		0.79739	0.37417
0.32807	0.16182		0.71798	0.92452		0.20027	0.32369		0.80501	0.12615		0.78709	0.41708		0.77742	0.39274
0.32835	0.2032		0.71492	0.92444		0.11765	0.32399		0.80462	0.12682		0.76561	0.3282		0.69514	0.47871
0.32843	0.21591		0.7555	0.92407		0.28423	0.32409		0.80398	0.1273		0.7359	0.23455		0.82506	0.41302
0.32856	0.20938		0.60619	0.92402		0.36891	0.32421		0.80387	0.12733		0.79702	0.32665		0.77024	0.39657
0.32876	0.18294		0.72173	0.92398		0.37123	0.32461		0.80381	0.12735		0.80393	0.22291		0.74773	0.39512
0.32879	0.19404		0.7407	0.92386		0.4737	0.32479		0.80331	0.12761		0.77173	0.24872		0.63585	0.36168
0.32929	0.21456		0.69639	0.92381		0.42826	0.32492		0.8032	0.12763		0.85493	0.27133		0.81423	0.51233
0.32934	0.13115		0.66553	0.92375		0.318	0.32496		0.80293	0.12772		0.81448	0.27236		0.74874	0.47062
0.32944	0.32403		0.6604	0.92343		0.46407	0.32502		0.80283	0.12778		0.84861	0.37699		0.7568	0.43916
0.32952	0.32856		0.63138	0.92341		0.30619	0.32516		0.80276	0.12784		0.83244	0.30627		0.80426	0.50506
0.33	0.2479		0.64749	0.92319		0.30712	0.32532		0.80236	0.12797		0.78078	0.58846		0.85494	0.65271
0.33	0.20274		0.59385	0.92309		0.5994	0.32532		0.80234	0.12815		0.79911	0.63086		0.83662	0.46443
0.33036	0.19164		0.63159	0.92305		0.41846	0.32533		0.80199	0.12819		0.78907	0.62571		0.76473	0.48134
0.33061	0.1987		0.63463	0.92278		0.38803	0.32538		0.80186	0.12852		0.74072	0.64154		0.90005	0.40689
0.33062	0.2563		0.71044	0.92277		0.34855	0.32543		0.80169	0.12861		0.71013	0.63441		0.59514	0.44706
0.3309	0.31248		0.5783	0.92238		0.27067	0.32565		0.80113	0.12863		0.83373	0.7493		0.78066	0.50518
0.33119	0.19661		0.66153	0.92172		0.2269	0.32572		0.80102	0.12877		0.78455	0.67403		0.90642	0.39788
0.33131	0.25186		0.64744	0.92148		0.12521	0.32576		0.80097	0.12941		0.80067	0.6844		0.62731	0.46561
0.33151	0.27578		0.53509	0.92135		0.13973	0.32602		0.8008	0.1296		0.81291	0.60839		0.95899	0.423
0.33154	0.1983		0.65641	0.92098		0.10801	0.32602		0.80074	0.12964		0.76379	0.55587		0.75761	0.48213
0.33161	0.17378		0.49147	0.92093		0.2536	0.32623		0.80058	0.13015		0.80874	0.58473		0.8628	0.15574
0.33192	0.15363		0.7017	0.9208		0.30405	0.32645		0.80006	0.13053		0.68856	0.68685		0.81129	0.15104
0.33222	0.18364		0.5635	0.92073		0.3954	0.32646		0.79986	0.13071		0.78806	0.5712		0.79239	0.18454
0.33228	0.21246		0.74569	0.92055		0.24676	0.32703		0.79972	0.13075		0.77199	0.60106		0.81504	0.27366
0.3325	0.27151		0.64942	0.92017		0.41213	0.32727		0.79954	0.13134		0.78559	0.59148		0.75396	0.3048
0.33257	0.26203		0.61532	0.91946		0.41526	0.32745		0.79944	0.13187		0.81886	0.5836		0.83278	0.34292
0.33264	0.21073		0.62562	0.9194		0.42745	0.32754		0.7987	0.13217		0.70383	0.5025		0.76745	0.22516
0.33266	0.22164		0.58725	0.9194		0.34701	0.32754		0.79826	0.13225		0.6996	0.62761		0.9099	0.19623
0.33266	0.26711		0.59209	0.91917		0.39611	0.32768		0.79786	0.13275		0.74926	0.67326		0.6825	0.31879
0.33287	0.32977		0.55069	0.91903		0.45351	0.32797		0.79768	0.13307		0.73758	0.62965		0.74726	0.27507
0.33315	0.21905		0.69426	0.91866		0.31309	0.3281		0.79752	0.13329		0.78295	0.67839		0.82659	0.20782
0.33337	0.17754		0.60119	0.91865		0.42598	0.32823		0.79722	0.1334		0.77891	0.66211		0.8821	0.18987
0.33372	0.23085		0.59165	0.91859		0.41474	0.32839		0.79716	0.13349		0.74037	0.59871		0.71916	0.16944
0.3338	0.29117		0.71578	0.91839		0.44748	0.32843		0.7971	0.1337		0.78318	0.66308		0.75646	0.31192
0.33381	0.24336		0.55708	0.91789		0.30047	0.32915		0.79681	0.13373		0.7014	0.55772		0.81426	0.17921
0.33405	0.2505		0.67899	0.91781		0.35653	0.32923		0.7967	0.13373		0.71959	0.56728		0.74743	0.29787
0.33475	0.21576		0.64275	0.91775		0.2053	0.32925		0.79662	0.13413		0.78407	0.57505		0.7498	0.25489
0.33557	0.1246		0.66704	0.91754		0.24435	0.32947		0.79628	0.13427		0.79381	0.55944		0.55396	0.24197
0.33586	0.1895		0.7088	0.91748		0.39602	0.32965		0.79618	0.13428		0.82075	0.58092		0.57156	0.23007
0.33586	0.22796		0.74953	0.91553		0.26499	0.33003		0.79616	0.13448		0.72743	0.63606		0.89596	0.16076
0.33587	0.23429		0.55357	0.91524		0.34497	0.33015		0.79589	0.13511		0.76178	0.59462		0.70438	0.25074
0.33598	0.18505		0.59837	0.91519		0.37116	0.33065		0.7958	0.13517		0.76968	0.5198		0.79868	0.1457
0.336	0.16641		0.7169	0.91509		0.34813	0.33073		0.79569	0.13524		0.81485	0.61024		0.91401	0.16377
0.33665	0.15644		0.68334	0.91507		0.56472	0.33105		0.79566	0.13536		0.8129	0.57098		0.87235	0.22095
0.33672	0.27596		0.66742	0.91479		0.25289	0.33123		0.79533	0.13545		0.7535	0.58041		0.80018	0.26431
0.33677	0.23455		0.70265	0.91469		0.4097	0.3313		0.7953	0.13551		0.16479	0.54895		0.7975	0.26836
0.33718	0.33635		0.5666	0.91448		0.46081	0.33132		0.79523	0.13564		0.18633	0.38844		0.87551	0.21968
0.33731	0.31781		0.52773	0.91447		0.26403	0.33141		0.79517	0.13571		0.22752	0.55759		0.8219	0.10767
0.33758	0.20584		0.56586	0.91444		0.40676	0.33142		0.79516	0.13581		0.25659	0.60659		0.8914	0.24485
0.3377	0.21455		0.63826	0.91421		0.54762	0.3318		0.79507	0.13626		0.17387	0.50609		0.76066	0.30849
0.33775	0.24433		0.62629	0.91333		0.31091	0.33196		0.79501	0.1364		0.20456	0.44921		0.68929	0.14133
0.33821	0.30194		0.5466	0.91275		0.25367	0.33238		0.79475	0.13642		0.26327	0.52282		0.70234	0.15288
0.33864	0.30679		0.68093	0.91264		0.27362	0.33255		0.79459	0.13647		0.21245	0.53254		0.8258	0.14392
0.3387	0.19426		0.60791	0.9126		0.2828	0.33276		0.79454	0.13737		0.21913	0.53573		0.76105	0.23099
0.33908	0.2547		0.69699	0.91197		0.26292	0.33286		0.79383	0.13754		0.20873	0.59362		0.79499	0.16714
0.33951	0.27857		0.71132	0.9112		0.32807	0.33298		0.79374	0.13766		0.18944	0.54575		0.79383	0.22582
0.33969	0.15323		0.69307	0.91102		0.22307	0.33301		0.7937	0.13786		0.31013	0.61811		0.89892	0.24261
0.33986	0.24197		0.61894	0.91076		0.25782	0.33316		0.79368	0.13793		0.29736	0.52591		0.85625	0.27017
0.3399	0.17268		0.57437	0.91069		0.25938	0.33331		0.79365	0.13806		0.26304	0.68271		0.86316	0.22634
0.33996	0.40585		0.6301	0.91016		0.22886	0.33395		0.79365	0.13809		0.25928	0.60994		0.8169	0.12031
0.34006	0.32117		0.59675	0.90986		0.26093	0.33437		0.79339	0.13816		0.22486	0.62526		0.7588	0.1093
0.3401	0.2105		0.70042	0.90948		0.23577	0.33453		0.79288	0.13867		0.25035	0.78325		0.70483	0.28589
0.34024	0.25296		0.6511	0.90923		0.21127	0.33484		0.79234	0.13876		0.23792	0.81705		0.82665	0.21267
0.34037	0.22531		0.58859	0.90837		0.2846	0.33505		0.79233	0.13877		0.23064	0.71668		0.8798	0.2915
0.34044	0.19741		0.59709	0.9081		0.33238	0.33526		0.79232	0.13878		0.21056	0.69945		0.82274	0.16769
0.34065	0.23986		0.59578	0.90805		0.28929	0.33535		0.79182	0.13901		0.24357	0.71257		0.69873	0.1337
0.34093	0.14911		0.62396	0.90747		0.22687	0.33546		0.79171	0.13906		0.18744	0.77223		0.70092	0.18704
0.34108	0.20291		0.691	0.90741		0.23346	0.33592		0.79169	0.13909		0.26132	0.69442		0.79359	0.41272
0.34116	0.29443		0.64388	0.90728		0.18211	0.33603		0.79115	0.13955		0.18664	0.60701		0.83393	0.26141
0.34143	0.19592		0.58828	0.90704		0.12295	0.33667		0.79108	0.13962		0.14991	0.54694		0.91607	0.2775
0.34175	0.2177		0.69914	0.90678		0.1925	0.33697		0.79097	0.13979		0.21092	0.73536		0.87707	0.13544
0.34183	0.14852		0.77141	0.90663		0.37859	0.33777		0.79087	0.13993		0.20505	0.77836		0.87073	0.21027
0.34212	0.24562		0.68344	0.90659		0.31666	0.33785		0.79077	0.14011		0.27028	0.65221		0.77013	0.19572
0.34218	0.34413		0.65763	0.90655		0.32931	0.33789		0.79059	0.14012		0.23342	0.67092		0.84261	0.21966
0.34227	0.2419		0.65783	0.90626		0.2692	0.33822		0.79025	0.14016		0.24252	0.71237		0.73891	0.11295
0.3423	0.15715		0.71684	0.90596		0.34635	0.33827		0.7901	0.1402		0.25483	0.56906		0.82851	0.19756
0.34275	0.26073		0.62947	0.90545		0.32125	0.33832		0.78992	0.14038		0.21119	0.56848		0.77917	0.28268
0.34277	0.25811		0.4307	0.90505		0.1527	0.33873		0.78934	0.14063		0.19709	0.56468		0.9478	0.33411
0.34286	0.26074		0.65536	0.90486		0.22379	0.33891		0.78921	0.14096		0.14007	0.577		0.81545	0.10843
0.34298	0.14539		0.87662	0.90482		0.12206	0.33908		0.78876	0.14117		0.23593	0.61384		0.90871	0.13404
0.343	0.25237		0.78454	0.90462		0.092224	0.3391		0.78866	0.14185		0.17314	0.6496		0.68182	0.12071
0.34321	0.2658		0.71146	0.90417		0.103	0.33971		0.78841	0.14198		0.13765	0.65226		0.80282	0.29879
0.34341	0.25393		0.64235	0.90393		0.1423	0.3399		0.78813	0.14199		0.22755	0.6738		0.7886	0.10369
0.34396	0.29112		0.75673	0.90383		0.18633	0.33993		0.78794	0.1424		0.27617	0.67474		0.78185	0.16885
0.34397	0.17853		0.672	0.90363		0.1657	0.33995		0.78753	0.14256		0.24733	0.64172		0.7974	0.25608
0.34405	0.25805		0.71883	0.90346		0.20346	0.34017		0.78745	0.14257		0.21128	0.50213		0.87549	0.18886
0.34443	0.35109		0.62326	0.90334		0.61449	0.34019		0.78729	0.14261		0.22632	0.61655		0.8702	0.15853
0.34454	0.30163		0.65868	0.903		0.58375	0.34043		0.78725	0.14269		0.22357	0.73686		0.76793	0.21047
0.3447	0.15922		0.66994	0.90294		0.42841	0.34063		0.78722	0.14317		0.23255	0.67123		0.79292	0.26242
0.34484	0.11657		0.67493	0.9026		0.48987	0.34085		0.78718	0.14335		0.18934	0.61421		0.85587	0.27951
0.34487	0.16273		0.66806	0.90259		0.56896	0.34093		0.78718	0.14335		0.18676	0.69666		0.68243	0.20444
0.34527	0.31091		0.77897	0.90252		0.62188	0.341		0.78701	0.14343		0.23608	0.59012		0.77834	0.26723
0.34542	0.62595		0.73541	0.90247		0.48973	0.34101		0.78697	0.14348		0.19867	0.6642		0.83428	0.090809
0.34568	0.6658		0.66641	0.90245		0.55544	0.34106		0.78694	0.14364		0.27121	0.69748		0.92099	0.22954
0.34608	0.59357		0.60371	0.90244		0.55168	0.34135		0.78682	0.14372		0.2394	0.69648		0.82698	0.25004
0.34622	0.81055		0.72979	0.90205		0.52507	0.34142		0.7867	0.14372		0.21607	0.82147		0.73458	0.25193
0.34643	0.65408		0.74159	0.90189		0.52894	0.34164		0.78666	0.14377		0.20477	0.88147		0.9911	0.087751
0.3466	0.66531		0.77489	0.90095		0.57445	0.34165		0.78645	0.14392		0.20173	0.89332		0.91685	0.22013
0.34662	0.64886		0.72152	0.90094		0.53032	0.34186		0.7859	0.14397		0.22947	0.85207		0.89907	0.2072
0.3467	0.80142		0.67831	0.90063		0.5507	0.3419		0.7856	0.14417		0.17808	0.89882		0.77992	0.28277
0.34676	0.52953		0.65681	0.90045		0.64918	0.34297		0.78518	0.14419		0.20139	0.87496		0.75959	0.13096
0.34685	0.59269		0.67919	0.90039		0.55557	0.34321		0.78515	0.1445		0.18738	0.83782		0.78474	0.31131
0.34687	0.59743		0.60151	0.90038		0.35844	0.34344		0.78506	0.14473		0.22078	0.57746		0.80997	0.24175
0.34746	0.62934		0.6136	0.90038		0.34103	0.34344		0.78493	0.14482		0.1213	0.36407		0.7831	0.22463
0.34747	0.56976		0.52803	0.90014		0.15644	0.34345		0.78485	0.14483		0.19783	0.67479		0.79449	0.16126
0.34808	0.61575		0.54066	0.8997		0.27162	0.3435		0.78457	0.14575		0.14898	0.66932		0.7423	0.14411
0.34809	0.49687		0.5122	0.8996		0.24423	0.34356		0.78442	0.14579		0.19167	0.61389		0.76576	0.090208
0.3482	0.61322		0.68248	0.89878		0.55695	0.34382		0.78411	0.14599		0.1991	0.87325		0.75602	0.18971
0.34832	0.65391		0.53125	0.89861		0.56304	0.34409		0.78361	0.14599		0.19659	0.65539		0.86863	0.20801
0.34847	0.82978		0.50546	0.89846		0.55857	0.34425		0.78314	0.14633		0.25381	0.55202		0.7913	0.26798
0.34847	0.57821		0.53449	0.89827		0.5253	0.34425		0.78275	0.14671		0.20982	0.6279		0.80634	0.25512
0.34859	0.70551		0.64053	0.89817		0.30523	0.34437		0.78266	0.14716		0.2246	0.60701		0.79772	0.23637
0.3488	0.64934		0.69595	0.89764		0.43558	0.34446		0.78231	0.14721		0.1673	0.59245		0.74776	0.23172
0.34886	0.61113		0.87307	0.89734		0.54906	0.34462		0.78231	0.14722		0.23424	0.67056		0.78133	0.30117
0.34887	0.68428		0.57927	0.89703		0.59561	0.34465		0.7823	0.14732		0.21582	0.51837		0.78323	0.22687
0.34889	0.5788		0.56763	0.89683		0.47804	0.3447		0.78168	0.1475		0.23668	0.56887		0.81924	0.21913
0.34896	0.77358		0.56349	0.89626		0.49931	0.34489		0.78125	0.14771		0.15562	0.60724		0.86319	0.313
0.3494	0.62105		0.55318	0.89609		0.61451	0.34496		0.78102	0.14785		0.20914	0.56908		0.82334	0.1757
0.34941	0.72217		0.5317	0.89605		0.49192	0.34551		0.78092	0.14797		0.18074	0.58667		0.82482	0.34543
0.34961	0.62374		0.56428	0.89531		0.58203	0.34583		0.78088	0.14803		0.28005	0.63541		0.85317	0.19076
0.34982	0.64298		0.5646	0.89434		0.61558	0.34586		0.78032	0.14819		0.21078	0.55488		0.8721	0.22576
0.34992	0.65015		0.52954	0.89403		0.48084	0.34588		0.78025	0.14845		0.2137	0.55298		0.8843	0.31814
0.35041	0.61385		0.60058	0.89369		0.53377	0.34653		0.78002	0.14848		0.22854	0.60041		0.88316	0.19019
0.35057	0.69521		0.58467	0.89352		0.46981	0.34711		0.77973	0.14863		0.22306	0.4895		0.7936	0.13475
0.35061	0.53738		0.54006	0.89329		0.34158	0.34752		0.77948	0.14906		0.22011	0.68501		0.82888	0.43428
0.35072	0.73426		0.5652	0.89295		0.54006	0.3476		0.77934	0.14911		0.18584	0.75508		0.82801	0.34305
0.35086	0.59573		0.59201	0.89263		0.58796	0.34778		0.77922	0.14921		0.21774	0.80535		0.8243	0.35513
0.35101	0.70347		0.68305	0.89243		0.49355	0.34792		0.77902	0.1493		0.25179	0.69227		0.9693	0.22641
0.35109	0.63217		0.69068	0.89236		0.47787	0.34793		0.77897	0.14937		0.21432	0.57447		0.9018	0.23633
0.35142	0.61109		0.67459	0.89233		0.52295	0.34797		0.77885	0.14946		0.16406	0.61965		0.82644	0.26243
0.35207	0.66394		0.68944	0.89208		0.63909	0.34814		0.77879	0.14948		0.20628	0.70503		0.89695	0.20805
0.35215	0.58927		0.54269	0.89202		0.45753	0.34816		0.77855	0.14965		0.1479	0.72369		0.45597	0.3545
0.35229	0.75923		0.58693	0.89179		0.5101	0.34838		0.77832	0.14967		0.22056	0.66478		0.52407	0.37289
0.35234	0.75015		0.55296	0.89125		0.59475	0.3484		0.77822	0.14969		0.24825	0.59685		0.62637	0.27038
0.35239	0.73303		0.67491	0.89119		0.55798	0.34863		0.77758	0.14972		0.1745	0.59679		0.44927	0.21171
0.35248	0.71797		0.61244	0.8908		0.48203	0.34864		0.77745	0.14973		0.25261	0.56054		0.5169	0.26898
0.35298	0.65074		0.60659	0.89055		0.5851	0.34907		0.77736	0.14982		0.24918	0.64076		0.51059	0.19209
0.35319	0.7424		0.59682	0.89007		0.52064	0.34938		0.77717	0.14988		0.23261	0.5404		0.67537	0.39376
0.35347	0.57679		0.56687	0.88909		0.64093	0.34991		0.77678	0.14992		0.20074	0.51435		0.66017	0.27944
0.35351	0.71138		0.62349	0.88898		0.57343	0.35		0.77675	0.14993		0.21573	0.6184		0.64205	0.25691
0.3536	0.64376		0.55444	0.88883		0.38993	0.35143		0.77629	0.15007		0.27118	0.61315		0.51958	0.37382
0.35368	0.70326		0.653	0.88849		0.53415	0.35197		0.77587	0.15019		0.21376	0.58592		0.65862	0.18144
0.35388	0.73955		0.58642	0.88706		0.52197	0.35197		0.7753	0.15042		0.21008	0.70168		0.67875	0.28279
0.35419	0.74975		0.59251	0.88687		0.35361	0.35207		0.77522	0.15049		0.22882	0.63693		0.56621	0.28827
0.35423	0.75236		0.6157	0.88683		0.47739	0.35212		0.77507	0.15051		0.24364	0.63994		0.70465	0.24431
0.35441	0.55396		0.59023	0.88675		0.53697	0.35217		0.77414	0.15074		0.31112	0.73263		0.86298	0.24309
0.35473	0.66796		0.59596	0.88647		0.61381	0.35227		0.77411	0.15083		0.1752	0.57821		0.71389	0.27193
0.35493	0.63751		0.56081	0.88624		0.41351	0.35264		0.77399	0.15108		0.1658	0.6335		0.72226	0.29432
0.35518	0.66208		0.54837	0.88607		0.40728	0.35294		0.77367	0.15163		0.22474	0.65797		0.62331	0.33768
0.35544	0.71042		0.59912	0.88606		0.72531	0.35309		0.77363	0.15183		0.28728	0.59078		0.54217	0.36703
0.35573	0.64548		0.55573	0.8852		0.5839	0.35313		0.77362	0.15222		0.21272	0.59594		0.56333	0.23481
0.35582	0.5381		0.62815	0.88492		0.58229	0.35316		0.77349	0.15228		0.26364	0.64309		0.70688	0.33857
0.35595	0.65329		0.5333	0.88459		0.67122	0.35324		0.77344	0.15243		0.15151	0.68783		0.63343	0.19229
0.35625	0.73882		0.59459	0.88449		0.61199	0.35351		0.77343	0.15245		0.23059	0.74072		0.60052	0.2303
0.35653	0.72368		0.61526	0.88332		0.52708	0.35354		0.7734	0.1527		0.22659	0.73613		0.57664	0.23916
0.35663	0.6068		0.58897	0.8833		0.59141	0.35369		0.7732	0.15275		0.2422	0.58296		0.63527	0.27758
0.35677	0.68941		0.53201	0.88271		0.58556	0.35381		0.77304	0.15285		0.22685	0.64463		0.75185	0.37281
0.357	0.6367		0.57641	0.88262		0.61914	0.35435		0.77302	0.15288		0.19031	0.60081		0.54816	0.35407
0.35706	0.64604		0.58901	0.88202		0.54032	0.35446		0.77281	0.1531		0.29421	0.69729		0.68353	0.26148
0.35708	0.61383		0.5801	0.88127		0.61643	0.35473		0.77274	0.15313		0.22443	0.58779		0.75477	0.26712
0.35756	0.65618		0.61235	0.88093		0.24741	0.35475		0.77233	0.15324		0.15579	0.61461		0.78031	0.26882
0.35797	0.68645		0.48636	0.88068		0.53712	0.35485		0.77203	0.1533		0.2373	0.6499		0.57428	0.13726
0.35837	0.65372		0.6317	0.88049		0.62427	0.3551		0.7717	0.15334		0.1631	0.58395		0.64517	0.31538
0.35843	0.57934		0.55842	0.88043		0.59213	0.35523		0.77135	0.15353		0.18538	0.61956		0.70336	0.27585
0.3585	0.64676		0.56227	0.88032		0.41536	0.35534		0.77129	0.15356		0.18077	0.60012		0.60814	0.25212
0.35861	0.63368		0.62745	0.87981		0.55993	0.3554		0.77116	0.15361		0.17829	0.62559		0.76916	0.29706
0.35863	0.53087		0.57713	0.87932		0.53168	0.35541		0.7709	0.15365		0.15597	0.62018		0.75205	0.30813
0.3587	0.57637		0.61174	0.87886		0.55869	0.35548		0.7708	0.15383		0.17863	0.55753		0.6448	0.21714
0.35881	0.54073		0.53271	0.87778		0.5743	0.35559		0.7708	0.15386		0.11937	0.56744		0.48195	0.33671
0.35893	0.68576		0.57826	0.87702		0.45745	0.35587		0.77046	0.15397		0.19324	0.67236		0.58854	0.12839
0.35896	0.6125		0.67211	0.87683		0.45482	0.35589		0.77044	0.15399		0.20538	0.69164		0.71042	0.27813
0.35956	0.5865		0.59267	0.87645		0.55963	0.35605		0.77039	0.15404		0.20244	0.62747		0.65676	0.21097
0.35967	0.71424		0.56456	0.87636		0.50789	0.35665		0.77036	0.15419		0.19845	0.59352		0.73317	0.23203
0.35971	0.70656		0.61512	0.87621		0.586	0.35671		0.77032	0.15432		0.2683	0.61863		0.66585	0.24098
0.35981	0.47014		0.60806	0.87589		0.57079	0.35691		0.76997	0.15442		0.23139	0.63261		0.86008	0.21645
0.36023	0.5547		0.49669	0.87581		0.59624	0.35696		0.76982	0.15465		0.23885	0.66665		0.72482	0.12642
0.36025	0.62068		0.593	0.87554		0.62554	0.35705		0.76976	0.15466		0.19891	0.59262		0.40304	0.19823
0.36027	0.63595		0.50258	0.87511		0.58475	0.35727		0.76881	0.15479		0.21042	0.62036		0.58325	0.27533
0.36061	0.66605		0.59241	0.8744		0.55093	0.35734		0.76812	0.15499		0.22045	0.63418		0.48886	0.22726
0.36082	0.58492		0.60258	0.8741		0.56849	0.35758		0.76781	0.15503		0.31503	0.54507		0.70127	0.38532
0.36115	0.62008		0.5451	0.87253		0.45764	0.35761		0.76776	0.15505		0.21639	0.64005		0.66747	0.20975
0.36118	0.54561		0.5545	0.87213		0.73615	0.35791		0.76745	0.15505		0.21547	0.67901		0.6218	0.35636
0.36118	0.72728		0.64343	0.87199		0.67343	0.35792		0.76744	0.15512		0.18594	0.56372		0.49573	0.17829
0.3612	0.6671		0.60883	0.87185		0.59629	0.35826		0.76733	0.15542		0.19478	0.49948		0.67137	0.29775
0.36143	0.75856		0.55978	0.87171		0.59038	0.35859		0.76722	0.15556		0.18816	0.63715		0.59103	0.23324
0.36152	0.73507		0.5464	0.87142		0.49896	0.35874		0.76716	0.15557		0.24351	0.6495		0.68678	0.22672
0.36161	0.70374		0.6113	0.87066		0.56157	0.35886		0.76711	0.15558		0.22079	0.65186		0.52271	0.28972
0.36168	0.64199		0.58791	0.8704		0.70904	0.35947		0.76686	0.15559		0.23072	0.65802		0.54169	0.23563
0.36179	0.64434		0.60674	0.87005		0.60844	0.35948		0.76667	0.1558		0.23534	0.59295		0.59688	0.31531
0.36254	0.65206		0.50261	0.86882		0.36005	0.3596		0.76665	0.15592		0.81105	0.23271		0.79037	0.24167
0.36285	0.62887		0.5887	0.8687		0.52905	0.35962		0.76649	0.1565		0.77932	0.22184		0.60408	0.20691
0.36294	0.67528		0.65484	0.86862		0.65595	0.35963		0.76633	0.15651		0.85929	0.20348		0.83232	0.29533
0.36308	0.5203		0.523	0.86861		0.47129	0.36014		0.76632	0.15652		0.82998	0.21946		0.69683	0.24711
0.36321	0.59851		0.59744	0.86858		0.63578	0.36052		0.76606	0.15664		0.88965	0.22815		0.47267	0.31688
0.36333	0.59629		0.62611	0.8685		0.70929	0.36089		0.76604	0.15671		0.77084	0.14426		0.55302	0.27419
0.36399	0.60735		0.57324	0.8683		0.68827	0.36136		0.76591	0.15673		0.77811	0.14775		0.52557	0.32085
0.36425	0.6716		0.61946	0.86812		0.60499	0.36138		0.76591	0.15676		0.84891	0.13397		0.54617	0.20954
0.36463	0.59411		0.55008	0.86752		0.53583	0.3614		0.76579	0.15679		0.94122	0.23513		0.55878	0.31014
0.36479	0.62216		0.65875	0.86729		0.55357	0.36148		0.76561	0.15699		1.0028	0.14034		0.4377	0.24234
0.36497	0.6503		0.51242	0.86722		0.67687	0.36155		0.76554	0.15707		0.93567	0.18565		0.65228	0.2164
0.36511	0.60654		0.55633	0.86689		0.63397	0.36163		0.76515	0.15723		0.93059	0.239		0.86518	0.23404
0.36518	0.68996		0.61324	0.86636		0.71007	0.36189		0.7648	0.15741		0.99916	0.20189		0.79055	0.24275
0.36557	0.66107		0.60837	0.86629		0.74364	0.36222		0.76424	0.15744		1.0118	0.17819		0.62127	0.2277
0.36584	0.71695		0.53951	0.8661		0.68629	0.36302		0.76402	0.15746		0.96088	0.19341		0.5429	0.37218
0.36587	0.61592		0.58551	0.86599		0.61237	0.36313		0.7634	0.15749		1.0131	0.18885		0.61376	0.43241
0.36587	0.43206		0.55156	0.86585		0.725	0.36316		0.76339	0.15766		0.90703	0.19237		0.6982	0.55283
0.36595	0.66313		0.6292	0.86477		0.72068	0.36328		0.76329	0.15766		1.0142	0.21127		0.79369	0.69851
0.36607	0.65367		0.47324	0.86474		0.70279	0.36332		0.76305	0.1577		0.97143	0.18273		0.80774	0.46337
0.36614	0.48917		0.63689	0.86387		0.72252	0.36334		0.76265	0.1578		1.035	0.19009		0.56594	0.50885
0.36632	0.48776		0.62383	0.86346		0.62348	0.36353		0.76245	0.15782		0.94098	0.18741		0.86602	0.46583
0.36653	0.66554		0.5926	0.86337		0.60187	0.36392		0.76223	0.1579		0.98552	0.10486		0.83388	0.56102
0.36696	0.57013		0.55812	0.86328		0.62476	0.36433		0.76207	0.15793		0.94795	0.196		0.766	0.52272
0.36698	0.56286		0.59523	0.86326		0.65713	0.36449		0.76179	0.15798		0.94858	0.16027		0.61567	0.62977
0.36714	0.65091		0.62679	0.86295		0.62518	0.3645		0.76176	0.15799		0.97457	0.15709		0.60825	0.56686
0.3672	0.78077		0.66697	0.86293		0.51623	0.36453		0.76175	0.158		0.96582	0.17073		0.79279	0.50034
0.36744	0.66129		0.5733	0.86184		0.62323	0.36481		0.76141	0.15816		0.92543	0.20568		0.71906	0.43065
0.36747	0.69421		0.48276	0.86184		0.58821	0.36491		0.76106	0.15824		0.97638	0.11828		0.64808	0.51518
0.36756	0.69754		0.61188	0.86162		0.69702	0.36492		0.76056	0.15894		0.97333	0.19616		0.66991	0.38939
0.36778	0.66309		0.55818	0.86152		0.67183	0.36495		0.76055	0.15906		0.97452	0.15697		0.74323	0.23439
0.36797	0.66628		0.58622	0.86144		0.55113	0.36511		0.76047	0.15915		1.0237	0.21354		0.64168	0.61635
0.36813	0.52133		0.59891	0.86074		0.57676	0.36531		0.76008	0.15938		0.97288	0.20851		0.74156	0.60546
0.36814	0.73331		0.62109	0.86073		0.61756	0.36582		0.76006	0.1594		0.97174	0.20183		0.75462	0.4885
0.36817	0.59385		0.54851	0.86031		0.58849	0.36598		0.75996	0.15954		0.96708	0.089221		0.78396	0.50844
0.3686	0.68952		0.59289	0.86002		0.63749	0.36613		0.75995	0.15956		0.94461	0.2159		0.65577	0.26318
0.36879	0.62125		0.6164	0.85981		0.67408	0.3664		0.75965	0.15961		0.98397	0.11767		0.79775	0.52234
0.36893	0.53537		0.55519	0.85964		0.52193	0.36688		0.75955	0.15973		1.0417	0.10453		0.7312	0.46298
0.36904	0.75079		0.53175	0.85929		0.53346	0.36691		0.7594	0.1598		0.97983	0.23869		0.79115	0.313
0.36927	0.67319		0.56262	0.85914		0.49339	0.36717		0.75904	0.16005		0.98954	0.14415		0.71535	0.39983
0.36932	0.73927		0.59091	0.85908		0.62139	0.36741		0.75898	0.16006		0.99029	0.2072		0.84792	0.31875
0.36952	0.72194		0.6016	0.85889		0.52283	0.36791		0.75896	0.16033		0.94811	0.15311		0.81605	0.45113
0.36958	0.68397		0.86288	0.85827		0.54387	0.36811		0.7589	0.16051		1.0177	0.22164		0.7048	0.37384
0.36969	0.62296		0.81931	0.85816		0.54434	0.36831		0.75885	0.16056		0.94904	0.19053		0.66777	0.4693
0.36972	0.6012		0.88015	0.85807		0.39411	0.36832		0.75865	0.16072		1.0234	0.2402		0.78906	0.44188
0.36996	0.63645		0.8433	0.85795		0.39397	0.36834		0.75863	0.16073		0.99505	0.15403		0.8668	0.64376
0.37002	0.74312		0.85402	0.85777		0.42008	0.3685		0.75833	0.16075		0.93029	0.17759		0.72709	0.57031
0.37005	0.58127		0.89814	0.85767		0.48203	0.3685		0.75817	0.16099		1.0259	0.14882		0.73208	0.37294
0.37016	0.68703		0.70837	0.85738		0.47084	0.36852		0.75816	0.16102		1.0198	0.20467		0.71152	0.52686
0.37036	0.56902		0.69258	0.85715		0.42522	0.36857		0.75763	0.16113		0.97322	0.22262		0.78413	0.6781
0.37047	0.72114		0.7777	0.85601		0.44202	0.3686		0.75744	0.16118		0.96741	0.28458		0.61842	0.59306
0.3707	0.60022		0.88203	0.85595		0.49022	0.36874		0.7574	0.16123		0.96496	0.21193		0.64281	0.63892
0.37109	0.61697		0.86068	0.85545		0.44589	0.36901		0.75715	0.16162		0.90615	0.16618		0.73344	0.64907
0.37122	0.55197		0.80875	0.85504		0.42137	0.3692		0.75701	0.16166		1.0192	0.20189		0.67818	0.58619
0.37128	0.71041		0.83829	0.85497		0.57991	0.37007		0.7568	0.16171		0.95491	0.19888		0.665	0.65848
0.37147	0.56253		0.87614	0.85427		0.51099	0.3701		0.75676	0.16185		1.0001	0.15556		0.66071	0.64373
0.37147	0.75408		0.8709	0.85424		0.4001	0.37039		0.75625	0.1622		1.0035	0.20839		0.66853	0.63256
0.37157	0.7155		0.74133	0.85368		0.50489	0.37079		0.75625	0.16223		1.0231	0.23653		0.87034	0.5493
0.37179	0.6577		0.77534	0.8532		0.45408	0.37103		0.75613	0.16224		0.96275	0.3755		0.74304	0.57068
0.37186	0.65942		0.90908	0.8525		0.32915	0.37108		0.75603	0.16241		0.86931	0.40969		0.73649	0.59374
0.37201	0.58593		0.81941	0.85171		0.39385	0.37115		0.75582	0.16253		0.94758	0.47072		0.7083	0.47891
0.37202	0.61135		0.88989	0.85133		0.32113	0.37166		0.75544	0.16253		0.97442	0.34326		0.66627	0.62721
0.37233	0.68312		0.88653	0.85133		0.26203	0.3719		0.75533	0.16257		0.94931	0.36469		0.69569	0.41719
0.37236	0.5989		0.9149	0.85132		0.39512	0.37193		0.75519	0.16278		1.0099	0.37586		0.74894	0.6036
0.37251	0.64835		0.81005	0.85119		0.35553	0.37207		0.755	0.16283		0.93259	0.34581		0.75804	0.51153
0.37257	0.50838		0.816	0.85082		0.33884	0.37225		0.75479	0.16295		0.9224	0.37555		0.89233	0.59807
0.37258	0.54368		0.67922	0.85069		0.53339	0.37233		0.7547	0.16307		0.96242	0.63095		0.89922	0.44704
0.37262	0.76745		0.88367	0.85053		0.39744	0.37247		0.75427	0.16336		0.94137	0.71203		0.80788	0.47213
0.37316	0.63734		0.8941	0.85031		0.44415	0.37256		0.75422	0.16336		0.98868	0.61998		0.81211	0.44676
0.37326	0.6328		0.87906	0.84995		0.54142	0.37285		0.75418	0.16339		0.99909	0.76992		0.80292	0.51643
0.37337	0.71543		0.8337	0.84961		0.41356	0.37292		0.75384	0.16345		0.98391	0.67133		0.85437	0.64365
0.37373	0.72647		0.8543	0.84948		0.54094	0.37328		0.75383	0.16348		1.0084	0.64719		0.84861	0.57437
0.37378	0.67036		0.81854	0.8492		0.43092	0.37333		0.75368	0.16353		0.48791	0.61156		0.74275	0.51561
0.37388	0.73647		0.84085	0.84895		0.56442	0.3734		0.75367	0.16406		0.58378	0.61768		0.85435	0.35489
0.37408	0.63715		0.87764	0.84762		0.38743	0.37346		0.75333	0.16411		0.56824	0.39114		0.77289	0.38704
0.37435	0.68481		0.85024	0.84756		0.533	0.37377		0.75306	0.16418		0.61098	0.38296		0.85017	0.48027
0.37435	0.66874		0.87396	0.84747		0.47402	0.37405		0.75286	0.16422		0.51159	0.28278		0.79378	0.49309
0.37448	0.62524		0.58707	0.84711		0.57601	0.37444		0.75283	0.16434		0.61822	0.42401		0.84165	0.59892
0.37461	0.61398		0.72083	0.84628		0.29913	0.37445		0.75255	0.16449		0.5762	0.44715		0.77875	0.35517
0.37487	0.62777		0.56505	0.84611		0.42853	0.37449		0.75241	0.1645		0.55916	0.41762		0.92241	0.3044
0.37507	0.56669		0.76048	0.84608		0.55527	0.37459		0.75217	0.16455		0.45489	0.44464		0.86337	0.18332
0.37523	0.70155		0.62369	0.84573		0.57447	0.37465		0.75195	0.16466		0.46303	0.27013		0.91528	0.52842
0.37543	0.58425		0.69624	0.84567		0.69581	0.37486		0.75163	0.16472		0.45952	0.53707		0.82976	0.51925
0.37564	0.84407		0.86237	0.84506		0.45545	0.37504		0.75161	0.16488		0.58702	0.46959		0.77886	0.45983
0.3761	0.66342		0.83769	0.84425		0.32382	0.37547		0.75144	0.1649		0.58625	0.63492		0.79064	0.59556
0.37611	0.65478		0.72171	0.84382		0.364	0.37558		0.7511	0.16509		0.62841	0.52455		0.7582	0.58621
0.37692	0.68184		0.85499	0.84379		0.47151	0.37597		0.75109	0.16529		0.51309	0.38658		0.72902	0.58239
0.37715	0.62904		0.90659	0.84322		0.56056	0.37616		0.75108	0.16529		0.64074	0.68161		0.74612	0.53199
0.3777	0.60009		0.85463	0.84289		0.4172	0.37634		0.75107	0.16533		0.54102	0.46474		0.89882	0.51969
0.37795	0.5608		0.86537	0.84283		0.48079	0.37637		0.75053	0.16549		0.59622	0.54175		0.65242	0.50177
0.37797	0.63605		0.84389	0.8427		0.53339	0.3768		0.75042	0.1655		0.54897	0.35505		0.78788	0.3171
0.37876	0.67013		0.88238	0.84255		0.70804	0.37701		0.75012	0.16554		0.6183	0.26897		0.80121	0.61686
0.37949	0.63993		0.81653	0.8423		0.48235	0.37715		0.74979	0.16557		0.59617	0.2336		0.83977	0.43848
0.37949	0.69494		0.86592	0.84213		0.36872	0.37731		0.74968	0.16557		0.48053	0.27691		0.88124	0.58131
0.37996	0.67305		0.84499	0.84206		0.27187	0.37761		0.74965	0.16561		0.66517	0.26379		0.87436	0.37183
0.38023	0.6789		0.84865	0.84197		0.37877	0.37774		0.74955	0.16592		0.56477	0.32351		0.79667	0.41731
0.38035	0.72994		0.83902	0.8418		0.56231	0.37783		0.74953	0.16595		0.48414	0.71223		0.93275	0.61845
0.38042	0.7395		0.79835	0.84133		0.34144	0.37784		0.74947	0.166		0.53311	0.58278		0.8394	0.63297
0.38067	0.84529		0.91107	0.84121		0.41482	0.37794		0.74933	0.16604		0.51536	0.54304		0.79115	0.69099
0.38112	0.67115		0.87344	0.84116		0.49351	0.3783		0.7491	0.16621		0.46625	0.51164		0.83838	0.55394
0.38132	0.62061		0.85259	0.84103		0.53417	0.37839		0.74903	0.1663		0.39448	0.29709		0.91772	0.60544
0.38134	0.66218		0.85631	0.84065		0.58597	0.37839		0.749	0.16668		0.36983	0.39124		0.90387	0.30979
0.38146	0.51599		0.9159	0.84049		0.47152	0.37846		0.74899	0.16678		0.45342	0.54559		0.93837	0.27743
0.38152	0.60729		0.88071	0.84048		0.5853	0.37858		0.74885	0.16704		0.37589	0.78717		0.81637	0.34477
0.3818	0.57401		0.81493	0.84024		0.48633	0.3788		0.74883	0.16716		0.38108	0.66651		0.86543	0.61255
0.38199	0.62926		0.82064	0.83996		0.36427	0.37905		0.74847	0.16735		0.34196	0.53502		0.91086	0.5492
0.38213	0.5362		0.91256	0.83983		0.58891	0.37925		0.74846	0.16754		0.30052	0.44989		0.87101	0.62669
0.38217	0.61224		0.74946	0.83971		0.58338	0.37926		0.74819	0.16759		0.48848	0.58251		0.79805	0.50345
0.38256	0.47314		0.50448	0.8395		0.46371	0.37994		0.74809	0.16765		0.52747	0.6938		0.88646	0.56545
0.38274	0.71867		0.55829	0.83901		0.30316	0.38003		0.74806	0.16772		0.47196	0.62813		0.82358	0.53401
0.38281	0.60549		0.56985	0.83899		0.47958	0.38004		0.74796	0.16783		0.56054	0.62703		0.8494	0.47536
0.38313	0.56547		0.87276	0.83795		0.49852	0.38017		0.74787	0.16807		0.45449	0.6533		0.85659	0.34291
0.38331	0.56021		0.86478	0.83747		0.16676	0.38031		0.74779	0.16811		0.40153	0.63276		0.79064	0.50462
0.38361	0.58816		0.88665	0.83687		0.39569	0.38068		0.7477	0.16815		0.47375	0.49582		0.79133	0.39093
0.38381	0.64558		0.85751	0.83619		0.4328	0.38079		0.74757	0.16819		0.532	0.50321		0.85686	0.62023
0.38391	0.74723		0.87739	0.83583		0.50124	0.38094		0.7474	0.16834		0.43671	0.54787		0.8206	0.59875
0.38411	0.63187		0.83594	0.83574		0.54351	0.38097		0.74726	0.16838		0.57852	0.49126		0.80164	0.59618
0.38443	0.79375		0.88039	0.83571		0.40391	0.38119		0.74726	0.16838		0.48902	0.66902		0.81575	0.533
0.38447	0.76216		0.87135	0.83538		0.37045	0.38129		0.74707	0.16859		0.58497	0.27293		0.84771	0.58107
0.38453	0.62515		0.84368	0.83496		0.53373	0.38146		0.74701	0.16884		0.4275	0.31809		0.89227	0.50342
0.38458	0.77753		0.7546	0.83491		0.42404	0.38147		0.74676	0.16922		0.47595	0.45466		0.86335	0.58738
0.38499	0.51088		0.83453	0.83389		0.46455	0.38162		0.74675	0.16939		0.47122	0.42396		0.81834	0.57255
0.3853	0.62209		0.56139	0.83386		0.38874	0.38176		0.74663	0.1694		0.38078	0.56288		0.77103	0.41115
0.38531	0.63606		0.85679	0.83367		0.41903	0.38177		0.74661	0.16953		0.4293	0.35836		0.83586	0.62438
0.38537	0.62632		0.85429	0.83292		0.32081	0.38197		0.74661	0.16953		0.30838	0.48294		0.8628	0.51789
0.38567	0.51201		0.82186	0.83272		0.3697	0.38222		0.74631	0.16999		0.28066	0.3514		0.81924	0.56041
0.38581	0.59369		0.74369	0.83267		0.4162	0.38229		0.74609	0.17004		0.59851	0.27956		0.84376	0.3287
0.38613	0.55006		0.70569	0.83225		0.33648	0.38242		0.74582	0.17005		0.46059	0.36013		0.80587	0.39659
0.38626	0.5886		0.71789	0.83198		0.52909	0.38244		0.74534	0.17007		0.59172	0.46182		0.83341	0.60397
0.38629	0.65894		0.71144	0.83179		0.30879	0.38248		0.74508	0.17037		0.33544	0.49589		0.81997	0.30396
0.3866	0.62393		0.62005	0.83173		0.47724	0.3831		0.74505	0.17038		0.40204	0.45801		0.83631	0.63129
0.38672	0.54657		0.70091	0.83139		0.44078	0.38343		0.74501	0.17044		0.40768	0.44862		0.81203	0.53091
0.38702	0.67423		0.63195	0.8313		0.43659	0.38346		0.74492	0.17061		0.29109	0.2789		0.89309	0.48669
0.38719	0.69825		0.67302	0.83087		0.4312	0.38375		0.74483	0.17065		0.37677	0.28458		0.86719	0.59654
0.3872	0.63486		0.62227	0.82955		0.5407	0.38397		0.74469	0.17071		0.50721	0.3864		0.88942	0.43793
0.38734	0.60954		0.69718	0.82949		0.59361	0.38428		0.74465	0.17074		0.43742	0.4586		0.74722	0.67611
0.38796	0.72526		0.64663	0.82901		0.65404	0.38432		0.74452	0.17087		0.4373	0.44272		0.57866	0.50116
0.38824	0.60631		0.7494	0.82895		0.49331	0.3845		0.74445	0.17112		0.3479	0.39375		0.71993	0.55252
0.38835	0.68339		0.62739	0.82884		0.35271	0.38501		0.74431	0.17116		0.37539	0.61537		0.68974	0.65141
0.38848	0.65791		0.65575	0.82825		0.33702	0.38507		0.74423	0.17118		0.43695	0.61169		0.71475	0.52577
0.38886	0.62954		0.68963	0.82784		0.38814	0.38531		0.74422	0.17131		0.40174	0.29016		0.68865	0.51152
0.3891	0.62857		0.64364	0.82767		0.28072	0.38559		0.74411	0.17143		0.46958	0.5537		0.85247	0.56022
0.38951	0.68041		0.71706	0.82659		0.35363	0.38562		0.74403	0.17148		0.43217	0.69807		0.66712	0.52192
0.39006	0.68676		0.68822	0.82649		0.36184	0.38564		0.74402	0.17181		0.3923	0.60854		0.72346	0.46932
0.39006	0.59484		0.61742	0.8263		0.55771	0.38571		0.74376	0.17212		0.36327	0.45768		0.72263	0.52565
0.39016	0.63894		0.63235	0.82577		0.53035	0.38599		0.7431	0.1722		0.48102	0.32485		0.78405	0.43399
0.39025	0.73138		0.79014	0.82564		0.61507	0.38602		0.74296	0.17231		0.45635	0.17828		0.7934	0.47412
0.39036	0.62839		0.7312	0.82557		0.66867	0.38631		0.74289	0.1724		0.45255	0.20676		0.86167	0.47608
0.39065	0.71816		0.65646	0.82547		0.78469	0.38667		0.74264	0.17249		0.51027	0.14777		0.83644	0.32383
0.39068	0.6666		0.54778	0.82545		0.48987	0.38681		0.74254	0.17288		0.56778	0.077566		0.76754	0.58194
0.39097	0.71178		0.60516	0.82463		0.70598	0.38797		0.74249	0.17294		0.41088	0.062787		0.82344	0.50043
0.39115	0.68422		0.62998	0.82439		0.52531	0.38802		0.74234	0.17295		0.35987	0.090195		0.72794	0.53039
0.3919	0.6052		0.5948	0.82391		0.58667	0.38803		0.74215	0.17311		0.30718	0.063975		0.9419	0.62164
0.39215	0.49606		0.62069	0.82388		0.56152	0.38829		0.74211	0.17319		0.39467	0.22028		0.79068	0.56725
0.3923	0.61093		0.5727	0.82356		0.61563	0.38856		0.74202	0.17319		0.42686	0.35569		0.68577	0.58535
0.39253	0.60536		0.63679	0.82352		0.75052	0.38865		0.742	0.17328		0.52681	0.24487		0.73295	0.59432
0.3928	0.63998		0.58087	0.82292		0.48877	0.38878		0.74189	0.17332		0.34914	0.54222		0.71041	0.433
0.39283	0.73497		0.61644	0.82274		0.56685	0.38943		0.74182	0.17333		0.47881	0.63052		0.79256	0.5603
0.39306	0.60994		0.50067	0.82157		0.61368	0.38949		0.74172	0.1734		0.46887	0.60453		0.66231	0.63328
0.39317	0.61611		0.60945	0.82116		0.67455	0.38951		0.74105	0.17364		0.38176	0.62348		0.80003	0.64632
0.39329	0.5944		0.56778	0.82101		0.70417	0.38991		0.74099	0.17367		0.45944	0.53067		0.79589	0.59364
0.39366	0.72292		0.67359	0.82093		0.35466	0.39009		0.74091	0.17398		0.39231	0.61013		0.57346	0.57938
0.39398	0.48918		0.59732	0.82066		0.42154	0.3902		0.74089	0.17416		0.38242	0.66471		0.68167	0.65341
0.39413	0.72075		0.60532	0.82038		0.31629	0.3904		0.74066	0.17425		0.45359	0.59865		0.77559	0.54163
0.39443	0.75804		0.61536	0.82013		0.31182	0.39062		0.74057	0.17427		0.55047	0.5382		0.73102	0.59266
0.39454	0.64003		0.56322	0.82012		0.47421	0.39094		0.74048	0.17486		0.37604	0.56826		0.71834	0.57647
0.39462	0.67447		0.51958	0.82003		0.42472	0.39106		0.74023	0.17491		0.36532	0.65202		0.63118	0.5864
0.39475	0.58836		0.57436	0.82001		0.44591	0.39119		0.73895	0.17495		0.37302	0.72614		0.60784	0.46884
0.39483	0.60754		0.59191	0.81999		0.44917	0.39121		0.73867	0.17499		0.34708	0.71809		0.67642	0.60855
0.39504	0.56456		0.57827	0.81929		0.41819	0.39147		0.73859	0.17509		0.38906	0.73364		0.64891	0.55692
0.39542	0.6691		0.61959	0.81899		0.5661	0.39177		0.73844	0.17521		0.45094	0.76609		0.57788	0.51362
0.39562	0.64765		0.54394	0.81894		0.49207	0.392		0.73815	0.17541		0.52706	0.78043		0.57851	0.60446
0.39565	0.62132		0.51485	0.81893		0.44132	0.3922		0.73765	0.17551		0.46913	0.76004		0.62937	0.56297
0.39576	0.57469		0.47929	0.81807		0.45851	0.39238		0.73754	0.17552		0.45391	0.59426		0.69692	0.3617
0.39577	0.58033		0.62379	0.818		0.48169	0.39279		0.73753	0.17563		0.48123	0.78244		0.71929	0.57044
0.39615	0.57479		0.53982	0.81791		0.44713	0.39293		0.73751	0.17564		0.44226	0.81323		0.77925	0.60134
0.39616	0.71732		0.56646	0.81768		0.61035	0.39298		0.7374	0.17569		0.45406	0.72824		0.68633	0.42684
0.39621	0.82154		0.65305	0.81761		0.45653	0.393		0.73723	0.1758		0.44597	0.80211		0.78028	0.61273
0.3966	0.67288		0.69177	0.81752		0.4917	0.39304		0.737	0.1758		0.4884	0.65479		0.5323	0.5896
0.3967	0.52241		0.67764	0.81742		0.46934	0.3931		0.737	0.17582		0.4803	0.70626		0.64212	0.46689
0.39672	0.59286		0.53778	0.81724		0.43915	0.39356		0.73672	0.1759		0.48228	0.65932		0.71484	0.60552
0.39709	0.76071		0.67649	0.81709		0.60259	0.39376		0.73668	0.17618		0.47153	0.67001		0.57806	0.66251
0.39728	0.56214		0.5712	0.81697		0.47558	0.39394		0.73667	0.1764		0.55413	0.72028		0.68588	0.54631
0.39781	0.74596		0.59751	0.81647		0.66041	0.39404		0.73613	0.17643		0.47444	0.63887		0.68695	0.6265
0.39815	0.80216		0.62661	0.81622		0.73326	0.39464		0.73604	0.17645		0.41165	0.39273		0.62539	0.5737
0.39824	0.67298		0.53683	0.81599		0.33452	0.39482		0.73533	0.17657		0.46862	0.53591		0.66349	0.60182
0.39844	0.56845		0.56761	0.81598		0.27502	0.39495		0.73516	0.17662		0.46732	0.37881		0.64756	0.56409
0.39844	0.62997		0.5055	0.81538		0.25313	0.39503		0.73497	0.1768		0.50848	0.47452		0.67909	0.50824
0.39854	0.71479		0.53788	0.81505		0.29148	0.39507		0.73481	0.17686		0.49308	0.37415		0.64961	0.58913
0.39902	0.66404		0.58132	0.81504		0.22373	0.39542		0.73463	0.17688		0.53365	0.42949		0.70962	0.66253
0.39902	0.65787		0.58133	0.81492		0.39735	0.39569		0.73454	0.17689		0.54456	0.35465		0.65347	0.62191
0.39903	0.6619		0.49744	0.81475		0.39446	0.39583		0.73452	0.17703		0.38324	0.52129		0.59517	0.45813
0.39946	0.68167		0.4364	0.81452		0.27401	0.3959		0.73437	0.17722		0.46917	0.50364		0.68021	0.46845
0.39967	0.67972		0.49235	0.81444		0.26555	0.39592		0.73427	0.17724		0.31622	0.61161		0.67269	0.57532
0.39981	0.71835		0.57783	0.81443		0.31891	0.39616		0.73424	0.17727		0.36139	0.464		0.57861	0.60901
0.39989	0.68854		0.58819	0.81431		0.25189	0.39652		0.73418	0.17736		0.3856	0.51574		0.5216	0.59023
0.40015	0.69266		0.57985	0.81417		0.28507	0.39671		0.73381	0.17757		0.4362	0.52787		0.68442	0.51759
0.40021	0.55471		0.5855	0.81387		0.38367	0.39677		0.7338	0.17765		0.41743	0.5696		0.63331	0.53946
0.40031	0.72312		0.60835	0.81387		0.49279	0.39729		0.7335	0.17766		0.57339	0.31441		0.56992	0.44992
0.40066	0.62232		0.64522	0.8137		0.31171	0.39731		0.73321	0.17769		0.4139	0.2464		0.54983	0.5901
0.40084	0.67336		0.60739	0.81351		0.32455	0.39732		0.73299	0.17784		0.38715	0.5535		0.78777	0.59249
0.40085	0.63863		0.63943	0.81337		0.38613	0.39751		0.73295	0.17784		0.4308	0.53437		0.68794	0.57453
0.40091	0.67397		0.59502	0.81283		0.34702	0.39766		0.73279	0.17786		0.42986	0.39159		0.65734	0.34086
0.40096	0.64077		0.56542	0.81201		0.5344	0.39766		0.73276	0.17789		0.48159	0.51863		0.64373	0.62263
0.401	0.64969		0.51946	0.81148		0.35873	0.39768		0.73254	0.17792		0.43208	0.56783		0.64547	0.45787
0.40119	0.65393		0.5881	0.81133		0.37918	0.39768		0.73252	0.17797		0.40725	0.61504		0.55344	0.57015
0.40139	0.66473		0.64704	0.81108		0.42667	0.39781		0.73246	0.178		0.38689	0.67064		0.73806	0.51336
0.40151	0.67175		0.52437	0.81106		0.35005	0.39789		0.7321	0.17802		0.45386	0.37304		0.63388	0.33149
0.40176	0.68055		0.51116	0.81083		0.37298	0.39855		0.73156	0.17807		0.46019	0.45257		0.60926	0.25727
0.40202	0.53954		0.57125	0.81055		0.36923	0.39894		0.73124	0.17815		0.43401	0.51151		0.61685	0.40703
0.40273	0.68474		0.60386	0.81036		0.26489	0.39902		0.73113	0.17826		0.53588	0.4154		0.6264	0.20239
0.40278	0.70626		0.65051	0.81017		0.3946	0.39903		0.73098	0.17833		0.55719	0.46241		0.65297	0.34859
0.40284	0.56885		0.57248	0.8099		0.38903	0.3991		0.7307	0.1784		0.48573	0.41454		0.61586	0.1979
0.40297	0.54548		0.54509	0.80906		0.39659	0.39928		0.73069	0.17845		0.51882	0.63392		0.70186	0.020835
0.40313	0.68751		0.54348	0.80882		0.36531	0.39946		0.73058	0.17846		0.50681	0.60026		0.65381	0.33128
0.4032	0.58715		0.62674	0.80871		0.41569	0.3996		0.73031	0.17853		0.49654	0.34143		0.73972	0.42157
0.40321	0.57884		0.58483	0.80866		0.35219	0.40037		0.7303	0.17861		0.47963	0.33372		0.66181	0.58805
0.40324	0.63878		0.6169	0.8083		0.30759	0.40069		0.73001	0.17861		0.50388	0.41394		0.75876	0.54149
0.40332	0.57228		0.57596	0.80818		0.31835	0.40092		0.73	0.17863		0.44071	0.43174		0.7107	0.90378
0.40343	0.63849		0.56142	0.80816		0.31469	0.40102		0.72987	0.17864		0.35643	0.51845		0.45225	0.85686
0.40352	0.61727		0.59742	0.80805		0.39997	0.40107		0.72977	0.17871		0.50083	0.5123		0.67558	0.80327
0.40362	0.60942		0.60097	0.80792		0.45197	0.40116		0.72973	0.17873		0.56182	0.4685		0.52523	0.85063
0.40408	0.63109		0.57497	0.80789		0.40664	0.40133		0.72967	0.17898		0.48065	0.38806		0.71163	0.88647
0.40416	0.43635		0.58327	0.8078		0.26472	0.40136		0.72952	0.17912		0.4709	0.35285		0.5414	0.79669
0.40417	0.55148		0.62861	0.80762		0.47011	0.40141		0.72948	0.1792		0.50072	0.39691		0.7203	0.8124
0.4042	0.73844		0.59904	0.80705		0.31205	0.40193		0.72935	0.17923		0.42943	0.41151		0.61181	0.71879
0.40446	0.6198		0.49824	0.80697		0.44267	0.40227		0.72899	0.17924		0.41547	0.48738		0.72092	0.92927
0.40464	0.69407		0.65854	0.80665		0.37188	0.40298		0.72897	0.17925		0.49346	0.40005		0.55804	0.83409
0.40464	0.65296		0.52658	0.80649		0.47463	0.40302		0.72867	0.17926		0.48628	0.42442		0.6591	0.94501
0.40474	0.73822		0.59914	0.80579		0.23485	0.40351		0.72856	0.17939		0.46675	0.38758		0.76485	0.971
0.40479	0.66287		0.55941	0.80555		0.3361	0.40354		0.72853	0.17958		0.49492	0.40479		0.52736	0.8443
0.40482	0.65527		0.5826	0.80537		0.44464	0.40365		0.72793	0.17976		0.57968	0.45917		0.61421	0.84077
0.40489	0.62553		0.64829	0.80486		0.34606	0.40416		0.72784	0.18045		0.55539	0.37008		0.60896	0.89222
0.40517	0.55785		0.55799	0.80483		0.38621	0.40452		0.72749	0.18047		0.54839	0.42862		0.70466	0.91302
0.40531	0.699		0.56578	0.80452		0.39866	0.40462		0.72747	0.1805		0.43013	0.61888		0.6668	0.86925
0.40534	0.65453		0.65815	0.80364		0.4191	0.40483		0.72743	0.18055		0.24316	0.46901		0.57986	0.86229
0.40548	0.67755		0.59304	0.80305		0.57374	0.40503		0.72716	0.18072		0.35959	0.49129		0.62307	0.97103
0.40554	0.60699		0.62496	0.80271		0.3786	0.40544		0.72705	0.18073		0.50705	0.44327		0.60693	0.83414
0.4057	0.5569		0.60131	0.80258		0.49164	0.40587		0.72654	0.18084		0.46891	0.4554		0.61996	0.82606
0.40586	0.68106		0.62291	0.80257		0.59537	0.40623		0.7263	0.18105		0.48492	0.37734		0.63734	0.83966
0.40588	0.52171		0.59633	0.802		0.45268	0.40635		0.72627	0.18111		0.5045	0.43022		0.73937	0.88678
0.4059	0.50994		0.6184	0.80176		0.49205	0.40643		0.72606	0.18119		0.39612	0.50864		0.52505	0.92739
0.4068	0.65171		0.6054	0.80141		0.40896	0.40659		0.72554	0.1812		0.46484	0.43736		0.65324	0.85782
0.407	0.56824		0.61332	0.80112		0.3782	0.40675		0.72532	0.1813		0.57382	0.38		0.57946	0.88513
0.40702	0.64241		0.59819	0.80074		0.41742	0.40701		0.72528	0.1813		0.53666	0.50611		0.63874	0.80239
0.40736	0.56165		0.59179	0.80041		0.52117	0.4071		0.72528	0.18132		0.30331	0.39287		0.59619	0.95311
0.40741	0.57622		0.62406	0.80012		0.5763	0.40738		0.72527	0.18142		0.19865	0.38995		0.61915	0.92326
0.40746	0.65456		0.53017	0.80007		0.48984	0.4076		0.72511	0.18143		0.28138	0.38678		0.74031	0.82435
0.40754	0.60837		0.62103	0.8		0.5654	0.4081		0.72507	0.18146		0.2881	0.16968		0.60133	0.85512
0.40763	0.65869		0.63003	0.79996		0.48139	0.40815		0.72475	0.18153		0.26425	0.54433		0.7085	0.98529
0.40769	0.60006		0.64466	0.79936		0.3774	0.40818		0.72451	0.18185		0.25773	0.51112		0.56054	0.91735
0.4077	0.5833		0.66057	0.79907		0.51582	0.40819		0.72441	0.18185		0.25667	0.47968		0.67774	0.841
0.40771	0.63274		0.55452	0.79894		0.51464	0.40862		0.72432	0.18197		0.26142	0.43		0.7716	0.85275
0.40775	0.67946		0.66301	0.797		0.48957	0.4087		0.72423	0.18198		0.30005	0.37824		0.59879	0.92212
0.40785	0.66439		0.67894	0.79653		0.49531	0.40906		0.72421	0.18198		0.27436	0.36901		0.52151	0.85187
0.4081	0.8177		0.61389	0.79534		0.5696	0.40907		0.72417	0.18204		0.25265	0.37058		0.65267	0.96414
0.40827	0.55237		0.62397	0.79517		0.37116	0.40944		0.72415	0.18222		0.2719	0.41268		0.6292	0.91103
0.40861	0.73516		0.58645	0.79488		0.40405	0.40945		0.72409	0.18256		0.3158	0.37888		0.71008	0.8887
0.40863	0.56744		0.58506	0.79463		0.49535	0.40959		0.72406	0.18271		0.33899	0.40779		0.7435	0.86493
0.40959	0.54211		0.56938	0.79462		0.48866	0.4098		0.7239	0.18273		0.24578	0.38467		0.57276	0.91075
0.40961	0.60088		0.67817	0.79439		0.40109	0.4101		0.72365	0.18277		0.30896	0.39388		0.66207	0.91242
0.4101	0.61251		0.59974	0.79413		0.52545	0.41015		0.72354	0.18294		0.28437	0.33225		0.64837	0.86147
0.41019	0.74734		0.52552	0.79373		0.4713	0.4103		0.72342	0.18298		0.27371	0.45353		0.60697	0.82683
0.41031	0.59963		0.65549	0.79368		0.44044	0.41037		0.72339	0.18299		0.28882	0.38729		0.60721	0.76202
0.41042	0.5632		0.57301	0.79298		0.46997	0.4104		0.72327	0.18299		0.31856	0.49259		0.70658	0.73766
0.41055	0.6205		0.64922	0.79272		0.51535	0.4105		0.7232	0.18303		0.21663	0.37576		0.67108	0.91321
0.41068	0.66905		0.55869	0.79217		0.61143	0.41058		0.7231	0.1832		0.28842	0.30317		0.68988	0.59034
0.41109	0.52095		0.55644	0.7917		0.52318	0.41064		0.72308	0.18325		0.33507	0.48563		0.53734	0.55544
0.41167	0.64498		0.54651	0.79139		0.55634	0.41096		0.72308	0.18342		0.34933	0.38193		0.68992	0.59018
0.41168	0.68497		0.61276	0.79135		0.44016	0.41122		0.72296	0.18343		0.33734	0.48486		0.68055	0.66791
0.41171	0.62162		0.63896	0.79132		0.40627	0.412		0.72248	0.18374		0.22933	0.41896		0.6902	0.65179
0.41179	0.65681		0.56066	0.79126		0.5556	0.41207		0.72246	0.18381		0.2957	0.42094		0.66195	0.73611
0.4118	0.69936		0.58967	0.79126		0.59246	0.41227		0.72226	0.18382		0.28337	0.41595		0.617	0.62982
0.41242	0.61961		0.55412	0.7911		0.41036	0.41245		0.7222	0.18383		0.31767	0.45265		0.63543	0.56644
0.41245	0.58626		0.59586	0.79094		0.54504	0.41262		0.72197	0.18396		0.33544	0.46598		0.87079	0.58514
0.41261	0.68949		0.62079	0.78974		0.36251	0.41267		0.72184	0.18416		0.41126	0.42976		0.81269	0.67971
0.41263	0.74202		0.60719	0.78971		0.50172	0.41274		0.72175	0.18419		0.27061	0.27131		0.82912	0.72544
0.41283	0.5144		0.62982	0.7893		0.45789	0.41295		0.72171	0.18428		0.33904	0.45636		0.73491	0.6285
0.41289	0.60546		0.56436	0.78926		0.49254	0.41296		0.72124	0.18428		0.39521	0.25573		0.91813	0.58546
0.41291	0.63265		0.58943	0.78925		0.49677	0.4131		0.72118	0.18429		0.30588	0.42354		0.73253	0.5579
0.41305	0.67474		0.64944	0.78896		0.40408	0.41322		0.72109	0.18447		0.29711	0.42312		0.87286	0.55886
0.41342	0.70638		0.6211	0.78861		0.28716	0.41342		0.72068	0.18455		0.29556	0.40173		0.79685	0.60314
0.41357	0.37671		0.54927	0.78855		0.52866	0.41371		0.7202	0.18456		0.30211	0.46189		0.83608	0.63333
0.4137	0.63521		0.61375	0.78847		0.52549	0.41423		0.71998	0.18472		0.32395	0.41249		0.87781	0.67316
0.41408	0.76704		0.6175	0.78846		0.60944	0.41426		0.71972	0.18475		0.28231	0.38273		0.82774	0.6392
0.41409	0.5235		0.6572	0.78822		0.61369	0.41442		0.7195	0.1848		0.29074	0.41127		0.929	0.59642
0.4141	0.66386		0.6547	0.78816		0.51515	0.41446		0.7191	0.1848		0.29366	0.43303		0.86204	0.5961
0.41421	0.56492		0.67057	0.78782		0.59907	0.41449		0.71905	0.18482		0.32249	0.46581		0.79249	0.5494
0.41468	0.6744		0.6681	0.7878		0.40224	0.41471		0.71866	0.18498		0.34631	0.32692		0.85714	0.61424
0.41469	0.62992		0.64425	0.78776		0.45047	0.41492		0.71864	0.18499		0.33412	0.42029		0.75495	0.68761
0.41473	0.52385		0.6357	0.78773		0.44715	0.41504		0.71843	0.18516		0.39447	0.38145		0.87569	0.63579
0.41535	0.61755		0.70605	0.78762		0.45059	0.41544		0.7183	0.18524		0.31901	0.43475		0.76326	0.60643
0.4154	0.54158		0.64094	0.78762		0.29481	0.4155		0.71811	0.18532		0.23365	0.42932		0.8367	0.60657
0.41573	0.58941		0.63945	0.78695		0.5231	0.41556		0.718	0.18533		0.28008	0.29826		0.86412	0.68878
0.41592	0.58139		0.68744	0.7868		0.50685	0.41584		0.7178	0.18538		0.28339	0.43469		0.86354	0.66036
0.41596	0.62667		0.72886	0.78679		0.4807	0.41611		0.71745	0.18541		0.37864	0.40031		0.9273	0.63167
0.41609	0.64021		0.66842	0.78673		0.49885	0.41651		0.71742	0.18549		0.42261	0.37777		0.92441	0.6422
0.41611	0.74712		0.68427	0.78663		0.46618	0.41676		0.71685	0.1855		0.29334	0.44954		0.77468	0.58187
0.41618	0.56234		0.58131	0.78596		0.62863	0.41694		0.71682	0.18554		0.35722	0.48395		0.93214	0.54483
0.4164	0.73141		0.6122	0.78582		0.5222	0.417		0.71657	0.18565		0.31872	0.45765		0.83972	0.61645
0.41647	0.54155		0.63088	0.78578		0.32286	0.41712		0.71645	0.18576		0.36502	0.42469		0.93974	0.5847
0.41666	0.59693		0.61819	0.78577		0.48881	0.41718		0.71624	0.18587		0.31303	0.39189		0.82593	0.68101
0.41681	0.66692		0.68198	0.78557		0.45909	0.41727		0.71594	0.18592		0.28252	0.42175		0.83523	0.55982
0.41687	0.676		0.63321	0.78544		0.57749	0.41739		0.71564	0.18594		0.23124	0.38949		0.8124	0.56346
0.41715	0.5019		0.5925	0.78517		0.6317	0.41741		0.71479	0.18594		0.40594	0.39268		0.89113	0.61427
0.41716	0.64932		0.64487	0.78461		0.56163	0.41794		0.7145	0.18597		0.39875	0.43962		0.87607	0.65262
0.41734	0.68885		0.63818	0.7846		0.54786	0.41806		0.71449	0.18598		0.37342	0.28048		0.76412	0.63665
0.4174	0.57232		0.58975	0.7844		0.39695	0.41809		0.71446	0.18598		0.2733	0.42018		0.84387	0.60179
0.41744	0.58708		0.65269	0.78421		0.53477	0.41819		0.71394	0.18603		0.33692	0.41441		0.84767	0.71623
0.41754	0.43515		0.63211	0.78406		0.59291	0.41829		0.71392	0.18608		0.34846	0.4309		0.90877	0.63379
0.41757	0.42006		0.6424	0.78378		0.45523	0.41839		0.71386	0.18624		0.24581	0.32598		0.7911	0.60712
0.41826	0.35592		0.57951	0.78362		0.59253	0.41879		0.71382	0.18644		0.35365	0.31213		0.82815	0.61984
0.41834	0.31571		0.61364	0.78335		0.39621	0.419		0.71332	0.18664		0.41642	0.30323		0.78746	0.65726
0.41844	0.52002		0.61099	0.78295		0.53686	0.41903		0.7131	0.18668		0.32565	0.46703		0.80815	0.64773
0.41899	0.3369		0.55879	0.78293		0.45399	0.41915		0.71307	0.18669		0.34231	0.47195		0.89989	0.61676
0.4192	0.43127		0.62951	0.78253		0.5942	0.41927		0.7129	0.18672		0.26604	0.4353		0.8305	0.62115
0.41925	0.42899		0.6377	0.78213		0.50651	0.41945		0.71261	0.18673		0.33612	0.43951		0.85936	0.63411
0.41932	0.33113		0.67412	0.78089		0.44842	0.41965		0.71246	0.18683		0.30509	0.37964		0.80793	0.70527
0.41943	0.38143		0.65076	0.78061		0.44146	0.42009		0.71246	0.18686		0.41615	0.44977		0.7578	0.68427
0.41944	0.3036		0.63424	0.78058		0.29548	0.42044		0.71226	0.18691		0.3568	0.4612		0.86085	0.66419
0.4195	0.40988		0.6124	0.78035		0.51158	0.42057		0.7122	0.18693		0.34678	0.37839		0.79067	0.52819
0.41986	0.54813		0.65965	0.77996		0.49416	0.42086		0.71188	0.18708		0.31274	0.42391		0.83026	0.54174
0.41994	0.42351		0.6242	0.77991		0.39283	0.42089		0.7118	0.18717		0.3806	0.34376		0.90141	0.67976
0.42032	0.4629		0.68441	0.77955		0.46445	0.42091		0.7117	0.18723		0.31706	0.48706		0.84737	0.61371
0.42063	0.49162		0.63865	0.7793		0.47643	0.42101		0.71154	0.18734		0.39703	0.48796		0.7446	0.61077
0.42076	0.45488		0.66559	0.77923		0.32898	0.42102		0.71152	0.18736		0.22195	0.37238		0.87028	0.68849
0.42088	0.37601		0.62264	0.77918		0.2101	0.42126		0.71143	0.18751		0.27652	0.35492		0.83409	0.58714
0.42117	0.49522		0.66913	0.77887		0.13956	0.42137		0.71131	0.18753		0.44313	0.49423		0.58345	0.74156
0.42118	0.40573		0.53204	0.77876		0.067567	0.42164		0.71102	0.18762		0.43258	0.42722		0.69972	0.60051
0.42131	0.54158		0.64225	0.7786		0.21084	0.42186		0.71086	0.18766		0.38562	0.19964		0.55965	0.63781
0.42137	0.42402		0.69041	0.77791		0.20534	0.4219		0.71079	0.18775		0.50013	0.27404		0.79528	0.6549
0.42141	0.42381		0.60924	0.77784		0.45348	0.42258		0.71063	0.18785		0.42598	0.20076		0.82661	0.73234
0.42165	0.3707		0.70131	0.77783		0.50505	0.42272		0.71059	0.18819		0.35258	0.25793		0.86256	0.78095
0.42172	0.42047		0.51513	0.77709		0.45884	0.42294		0.71047	0.1883		0.23004	0.2468		0.82424	0.61814
0.42189	0.49447		0.61979	0.77687		0.51767	0.42296		0.71015	0.18836		0.31942	0.31962		0.79365	0.58379
0.42259	0.46523		0.67524	0.77683		0.42138	0.42329		0.70997	0.18844		0.30597	0.21058		0.84279	0.61759
0.42281	0.44659		0.66389	0.7768		0.50955	0.42329		0.70983	0.18863		0.37109	0.18749		0.82844	0.64857
0.42304	0.57348		0.5918	0.77678		0.53772	0.42331		0.70968	0.1887		0.38252	0.20089		0.85017	0.62305
0.4231	0.46935		0.56129	0.77647		0.46868	0.42365		0.70966	0.18887		0.27676	0.43132		0.74142	0.50572
0.42317	0.59147		0.55322	0.77564		0.62115	0.4237		0.70962	0.18888		0.33246	0.24511		0.80102	0.6539
0.42355	0.41305		0.49708	0.77552		0.42277	0.42381		0.70959	0.18888		0.42173	0.24754		0.87585	0.54201
0.4238	0.37912		0.55285	0.77484		0.45504	0.42505		0.70953	0.18889		0.30364	0.21838		0.8594	0.68544
0.42418	0.46859		0.57527	0.77478		0.56238	0.42545		0.70947	0.18918		0.28021	0.2225		0.83129	0.60919
0.42428	0.54316		0.52018	0.77468		0.62672	0.4256		0.7094	0.18955		0.29093	0.1106		0.74384	0.56972
0.42443	0.45633		0.56354	0.77466		0.47598	0.42564		0.70918	0.18961		0.3646	0.19276		0.81188	0.66539
0.42444	0.47131		0.58073	0.77458		0.54528	0.42571		0.709	0.18969		0.35734	0.17995		0.85612	0.70133
0.42456	0.40544		0.65547	0.77457		0.55844	0.42583		0.70882	0.18988		0.23309	0.16905		0.66138	0.70897
0.42471	0.32008		0.68802	0.77427		0.41082	0.4259		0.7088	0.19004		0.17449	0.27259		0.7221	0.58759
0.42487	0.55926		0.63401	0.77418		0.57702	0.42609		0.70858	0.19005		0.14341	0.34814		0.82763	0.67893
0.42504	0.47519		0.56006	0.77374		0.52468	0.42674		0.70856	0.19023		0.21888	0.30269		0.74019	0.56973
0.42508	0.45616		0.59219	0.77365		0.45789	0.42779		0.70853	0.19024		0.28567	0.2955		0.79397	0.65196
0.42522	0.43803		0.584	0.77296		0.53166	0.42793		0.70851	0.19041		0.22952	0.17383		0.72935	0.61268
0.42546	0.57241		0.55701	0.77274		0.52825	0.42823		0.70848	0.19045		0.22314	0.28679		0.88698	0.51741
0.42578	0.49089		0.55637	0.7726		0.31782	0.42849		0.70848	0.19047		0.22276	0.2624		0.89307	0.59222
0.42598	0.49169		0.53316	0.77166		0.37797	0.42879		0.70815	0.19059		0.27461	0.1539		0.68576	0.52455
0.42618	0.61221		0.54302	0.7715		0.51824	0.42882		0.70814	0.19069		0.20257	0.20393		0.80099	0.56932
0.42622	0.51853		0.58541	0.77096		0.60385	0.42883		0.70776	0.19082		0.23801	0.25647		0.83091	0.69012
0.42652	0.36382		0.58254	0.77085		0.52505	0.42911		0.70775	0.19084		0.27022	0.19604		0.808	0.78969
0.42658	0.40475		0.59556	0.77081		0.53029	0.42911		0.70758	0.19085		0.33932	0.24274		0.88309	0.59513
0.4267	0.59286		0.51525	0.7706		0.35458	0.42918		0.7075	0.19086		0.29366	0.23237		0.78981	0.65559
0.42691	0.57562		0.38204	0.76992		0.50373	0.42932		0.70737	0.19106		0.25545	0.15521		0.99635	0.65979
0.42729	0.54235		0.59491	0.76988		0.37614	0.42954		0.70712	0.19109		0.27245	0.33469		0.87745	0.64131
0.42732	0.61811		0.45559	0.76981		0.56436	0.42981		0.70704	0.19132		0.24754	0.17763		0.74327	0.62482
0.42739	0.57919		0.45011	0.76954		0.39893	0.42984		0.7065	0.19134		0.27776	0.28324		0.90783	0.50141
0.42755	0.54662		0.50963	0.76951		0.49942	0.42995		0.70635	0.19136		0.25029	0.22153		0.83235	0.58438
0.42782	0.48516		0.45427	0.76945		0.5945	0.43012		0.70628	0.19158		0.24103	0.22858		0.79371	0.59204
0.42783	0.43243		0.42803	0.76935		0.47074	0.43019		0.70612	0.19178		0.27136	0.2184		0.75795	0.57962
0.42791	0.55067		0.55557	0.76899		0.50275	0.4304		0.70594	0.1918		0.25934	0.20779		0.91315	0.75261
0.42795	0.39144		0.5618	0.76895		0.54535	0.43045		0.70591	0.19187		0.2379	0.22337		0.80971	0.58912
0.42796	0.49744		0.53246	0.76835		0.44278	0.43088		0.70585	0.19206		0.25589	0.38923		0.81124	0.5807
0.42799	0.47009		0.42412	0.76804		0.41615	0.43117		0.70571	0.1921		0.28859	0.22994		0.83782	0.53518
0.42799	0.4697		0.53599	0.76792		0.31358	0.43124		0.70553	0.19213		0.23625	0.23171		0.82354	0.7653
0.42802	0.42399		0.43159	0.76776		0.51022	0.43134		0.70527	0.19218		0.29099	0.22924		0.78358	0.72756
0.42826	0.44396		0.46171	0.76754		0.54467	0.43144		0.70524	0.19222		0.21921	0.16937		0.86328	0.6452
0.4284	0.52042		0.56171	0.7669		0.47881	0.43185		0.70501	0.19228		0.28191	0.23869		0.7881	0.71243
0.42843	0.54559		0.49812	0.76687		0.46691	0.43228		0.70489	0.19257		0.26133	0.15613		0.89306	0.64714
0.42898	0.41984		0.54685	0.76673		0.36017	0.43238		0.70474	0.19267		0.32354	0.24723		0.85314	0.71452
0.42904	0.52268		0.57802	0.76667		0.50042	0.43246		0.70471	0.19268		0.3995	0.23055		0.79923	0.6717
0.42938	0.43293		0.42834	0.76634		0.3934	0.43257		0.70462	0.19273		0.18796	0.28358		0.81263	0.55234
0.42946	0.52064		0.41409	0.7662		0.46375	0.43289		0.7044	0.19274		0.26234	0.65493		0.91075	0.63321
0.4295	0.55039		0.44492	0.76603		0.55127	0.43289		0.70424	0.19275		0.23149	0.69073		0.85317	0.60854
0.42964	0.6088		0.53941	0.76591		0.44634	0.43313		0.70424	0.1931		0.25743	0.59461		0.71907	0.62263
0.42973	0.5077		0.45114	0.76551		0.51672	0.43327		0.70412	0.1931		0.46829	0.61593		0.85555	0.62313
0.42975	0.30881		0.43205	0.76542		0.57378	0.43383		0.70402	0.19313		0.34373	0.55332		0.82156	0.67283
0.42989	0.23539		0.56373	0.76535		0.45925	0.43384		0.70392	0.19362		0.37134	0.648		0.76091	0.6104
0.42994	0.54769		0.5639	0.76527		0.33037	0.43392		0.70383	0.19366		0.24139	0.55306		0.89063	0.62392
0.43	0.36935		0.54687	0.76458		0.49003	0.43406		0.70383	0.19369		0.24617	0.67192		0.85256	0.67554
0.43013	0.46869		0.49555	0.76455		0.38484	0.43417		0.7037	0.19383		0.2896	0.6633		0.8164	0.5804
0.43073	0.56371		0.46135	0.76452		0.5132	0.4344		0.7037	0.19391		0.21332	0.72448		0.80777	0.70386
0.43087	0.61257		0.50327	0.76444		0.4758	0.43447		0.70358	0.19394		0.22268	0.50102		0.80595	0.67579
0.43121	0.59172		0.63978	0.76438		0.49486	0.43456		0.70328	0.19396		0.24652	0.63181		0.87468	0.65094
0.43137	0.61097		0.55736	0.76382		0.5403	0.43466		0.70303	0.19403		0.29594	0.53738		1.0131	0.65516
0.43142	0.61849		0.53533	0.76357		0.58399	0.43487		0.70299	0.19404		0.31662	0.64922		0.73436	0.67392
0.43168	0.4806		0.64191	0.76344		0.47452	0.43514		0.70287	0.1944		0.39626	0.6882		0.78641	0.69979
0.43172	0.62887		0.51779	0.76328		0.43518	0.43526		0.70272	0.19441		0.33972	0.60779		0.84224	0.54821
0.43182	0.47001		0.51448	0.76326		0.51212	0.43581		0.70263	0.19445		0.24682	0.66396		0.80582	0.6475
0.43189	0.53078		0.40283	0.76305		0.58322	0.43589		0.70248	0.19448		0.34151	0.55692		0.71527	0.61139
0.43205	0.56226		0.47192	0.76285		0.49451	0.43607		0.70232	0.19449		0.33669	0.64792		0.85817	0.49726
0.43215	0.48442		0.4918	0.76282		0.54186	0.43618		0.70204	0.19461		0.38637	0.64246		0.84964	0.61335
0.43216	0.50043		0.49808	0.76281		0.35935	0.4362		0.70188	0.19498		0.46567	0.71277		0.80807	0.65716
0.43219	0.5042		0.52229	0.76274		0.37138	0.43668		0.70164	0.19499		0.4695	0.72366		0.72458	0.66738
0.4323	0.35899		0.52884	0.76266		0.54396	0.43673		0.70135	0.19502		0.34052	0.60192		0.8746	0.70178
0.43234	0.50738		0.56668	0.76255		0.50173	0.43707		0.7013	0.19504		0.36637	0.53057		0.91442	0.58851
0.43251	0.60844		0.47663	0.76249		0.31235	0.43707		0.70113	0.19511		0.27077	0.65711		0.91563	0.60139
0.43274	0.58536		0.51023	0.76243		0.34766	0.43714		0.70112	0.19536		0.25048	0.56577		0.95209	0.66793
0.4328	0.54425		0.41262	0.76206		0.39966	0.4373		0.70071	0.19542		0.31099	0.60874		0.84984	0.65201
0.43282	0.58831		0.5246	0.76204		0.53513	0.43747		0.70059	0.19582		0.29476	0.53895		0.86531	0.4834
0.43306	0.56637		0.56218	0.7619		0.57702	0.43752		0.70026	0.19588		0.33037	0.63293		0.79831	0.61291
0.43323	0.49347		0.59359	0.76159		0.45662	0.43772		0.70007	0.19599		0.26835	0.54981		0.86912	0.60637
0.43333	0.46963		0.67795	0.76063		0.4489	0.43784		0.70004	0.19603		0.23453	0.60517		0.65985	0.6293
0.43339	0.56305		0.71083	0.76056		0.51882	0.43816		0.69986	0.19614		0.25442	0.64911		0.88054	0.7123
0.43341	0.57797		0.66569	0.76043		0.44656	0.43838		0.69981	0.19622		0.26065	0.61999		0.78356	0.59889
0.4335	0.53525		0.5675	0.76041		0.5517	0.43916		0.69981	0.19628		0.24211	0.75833		0.79415	0.68525
0.43351	0.52096		0.60503	0.76035		0.56994	0.43951		0.69957	0.19651		0.29374	0.59587		0.78841	0.65427
0.43353	0.48478		0.46679	0.76032		0.5055	0.43967		0.69922	0.19665		0.28903	0.57671		0.84382	0.67378
0.43397	0.6035		0.48143	0.76027		0.50485	0.43968		0.69914	0.19665		0.3118	0.6967		0.80729	0.61802
0.43419	0.39379		0.60251	0.76018		0.62526	0.43972		0.69894	0.19669		0.35079	0.61097		0.81333	0.57199
0.43444	0.45309		0.52965	0.75984		0.39773	0.43986		0.69873	0.19671		0.30266	0.6679		0.88362	0.63027
0.43476	0.52107		0.55333	0.75944		0.41699	0.44007		0.69861	0.19672		0.38731	0.69496		0.87518	0.5308
0.43486	0.35751		0.49784	0.75907		0.49958	0.44035		0.69827	0.19678		0.2689	0.57975		0.76548	0.6725
0.4351	0.39034		0.37898	0.75857		0.42322	0.44046		0.69822	0.19681		0.26838	0.69026		0.79236	0.73905
0.43517	0.43843		0.5484	0.75837		0.47434	0.4409		0.69813	0.19693		0.28581	0.59022		0.80139	0.6881
0.43563	0.5284		0.53547	0.75821		0.45095	0.44108		0.69805	0.19701		0.21183	0.60601		0.7725	0.56667
0.43574	0.62334		0.56701	0.75805		0.45117	0.44125		0.69792	0.19704		0.28776	0.55864		0.84232	0.60545
0.43588	0.53633		0.59085	0.758		0.41262	0.4419		0.6979	0.19704		0.24356	0.65327		0.82241	0.57951
0.43603	0.3204		0.64341	0.75788		0.53488	0.44214		0.69764	0.19708		0.27481	0.57326		0.85047	0.64504
0.43618	0.45661		0.66207	0.75727		0.49002	0.44238		0.69739	0.19715		0.3599	0.60839		0.82525	0.60588
0.43619	0.42858		0.61296	0.75672		0.42652	0.44271		0.69738	0.19724		0.32928	0.63212		0.88733	0.62075
0.4365	0.37812		0.63847	0.75647		0.49035	0.44272		0.69735	0.19738		0.35339	0.67873		0.84283	0.62953
0.43652	0.33254		0.62829	0.75647		0.42271	0.443		0.69714	0.19743		0.30374	0.71582		0.82589	0.66204
0.43667	0.38029		0.63925	0.75614		0.48368	0.44331		0.69705	0.19772		0.31893	0.71706		0.78779	0.59902
0.4367	0.34413		0.57754	0.75613		0.47093	0.44348		0.69692	0.19775		0.21941	0.62003		0.83078	0.66963
0.43676	0.36711		0.64605	0.75602		0.49999	0.44354		0.69692	0.19781		0.2803	0.66279		0.88054	0.56898
0.43693	0.48379		0.66246	0.75601		0.4513	0.44362		0.69691	0.19795		0.36909	0.61426		0.77252	0.61053
0.43699	0.50283		0.58379	0.75597		0.36372	0.444		0.69686	0.19809		0.40867	0.57371		0.8373	0.62311
0.43709	0.63519		0.36371	0.75559		0.49504	0.44483		0.69675	0.19811		0.2438	0.66098		0.81112	0.66812
0.43717	0.53718		0.59068	0.755		0.43047	0.44503		0.69647	0.19812		0.36918	0.63287		0.85064	0.58821
0.43717	0.62402		0.37907	0.75495		0.48013	0.44524		0.69639	0.19827		0.37388	0.62997		0.79825	0.65464
0.43723	0.60242		0.453	0.7545		0.51535	0.44542		0.69636	0.19847		0.3629	0.65438		0.8364	0.62144
0.43758	0.59835		0.54558	0.75446		0.42323	0.44544		0.69632	0.19872		0.30422	0.65835		0.78212	0.57317
0.43792	0.42371		0.54772	0.75436		0.40238	0.44555		0.69616	0.19882		0.23435	0.57149		0.84668	0.65356
0.43804	0.70326		0.44373	0.7538		0.52361	0.44595		0.69604	0.19882		0.3148	0.50872		0.79088	0.6732
0.43843	0.58523		0.46509	0.75373		0.4862	0.44625		0.69602	0.19888		0.25165	0.6774		0.88004	0.75239
0.43849	0.59024		0.50994	0.7535		0.52745	0.44628		0.69585	0.19892		0.21145	0.66673		0.79353	0.74139
0.43906	0.7097		0.48418	0.75331		0.43664	0.44642		0.69575	0.19895		0.35489	0.69166		0.82463	0.6259
0.43928	0.62795		0.515	0.7532		0.33412	0.44693		0.6957	0.19899		0.32265	0.56448		0.83489	0.59225
0.44014	0.61947		0.4254	0.7528		0.3707	0.44711		0.6957	0.19901		0.33236	0.71072		0.8237	0.62745
0.44016	0.5713		0.47654	0.75277		0.46023	0.44712		0.69569	0.19904		0.27072	0.62304		0.8248	0.58652
0.44035	0.63078		0.43635	0.75247		0.3927	0.44728		0.69553	0.19911		0.31133	0.63602		0.80565	0.5469
0.44044	0.46501		0.50844	0.75182		0.49506	0.44757		0.69545	0.19913		0.31527	0.65345		0.84563	0.56253
0.44074	0.46222		0.53293	0.75153		0.45428	0.44787		0.6953	0.19918		0.4053	0.65465		0.82913	0.67288
0.44077	0.52987		0.46297	0.7514		0.46642	0.44798		0.69521	0.19923		0.31388	0.59821		0.76649	0.66428
0.44084	0.66694		0.43884	0.7513		0.48966	0.44805		0.69513	0.19923		0.25901	0.59399		0.77283	0.54092
0.4411	0.563		0.49268	0.75096		0.50321	0.44838		0.69507	0.19935		0.24449	0.70329		0.76568	0.67273
0.44112	0.59624		0.47312	0.7509		0.44455	0.44855		0.69493	0.19943		0.31286	0.61737		0.80324	0.59983
0.44161	0.60907		0.52821	0.75066		0.49989	0.44867		0.69489	0.19953		0.27172	0.63235		0.73729	0.65833
0.44164	0.43706		0.59539	0.75001		0.42262	0.44877		0.69487	0.19954		0.33507	0.66787		0.81091	0.63498
0.44192	0.61724		0.42409	0.74995		0.45209	0.44879		0.69487	0.19962		0.31034	0.67815		0.7464	0.57841
0.44232	0.55966		0.48056	0.74992		0.51529	0.44901		0.69484	0.19964		0.2429	0.62838		0.81612	0.66632
0.44233	0.51809		0.54844	0.74986		0.45511	0.44925		0.6947	0.19978		0.30729	0.60197		0.77775	0.75184
0.44247	0.54469		0.56121	0.74984		0.43947	0.4493		0.69465	0.19985		0.37847	0.63249		0.83023	0.40968
0.44255	0.67961		0.47255	0.74959		0.50903	0.4498		0.69461	0.20011		0.38585	0.58302		0.81667	0.64736
0.44259	0.59998		0.63593	0.7493		0.46725	0.44985		0.69457	0.20019		0.30476	0.56389		0.84663	0.74794
0.44267	0.59662		0.45891	0.74913		0.39893	0.44996		0.69455	0.20022		0.26948	0.62956		0.8362	0.49684
0.44277	0.62374		0.57203	0.74866		0.59428	0.45001		0.69448	0.20045		0.18999	0.53312		0.84084	0.59137
0.44315	0.8725		0.77459	0.7484		0.55775	0.45027		0.69441	0.20056		0.31507	0.5983		0.84082	0.63388
0.44327	0.61704		0.55387	0.74816		0.46223	0.45031		0.69432	0.20062		0.24894	0.59143		0.84967	0.68609
0.44343	0.58851		0.56732	0.74814		0.39808	0.45093		0.69418	0.20066		0.31199	0.45421		0.80499	0.48051
0.4438	0.63585		0.48589	0.74785		0.47604	0.45098		0.69415	0.20066		0.19684	0.54846		0.78012	0.62241
0.44396	0.57968		0.39682	0.7478		0.42041	0.45112		0.69397	0.2007		0.36922	0.475		0.79683	0.60911
0.444	0.57674		0.52617	0.74776		0.66313	0.45135		0.69396	0.20074		0.382	0.7047		0.79086	0.70347
0.44411	0.60433		0.4319	0.74748		0.44586	0.45143		0.69393	0.20079		0.32628	0.64029		0.83166	0.57444
0.44413	0.55058		0.47818	0.74707		0.4641	0.45168		0.69389	0.20084		0.47977	0.64088		0.78676	0.53647
0.44444	0.49644		0.5443	0.74698		0.516	0.45184		0.6937	0.20086		0.51032	0.60448		0.79248	0.58029
0.44467	0.666		0.45273	0.74679		0.44992	0.45187		0.69308	0.201		0.39275	0.67384		0.708	0.66633
0.44472	0.66618		0.38177	0.74635		0.37771	0.45197		0.69295	0.20109		0.43792	0.61697		0.78694	0.69994
0.44482	0.66135		0.43683	0.7462		0.50307	0.45202		0.69284	0.20112		0.37809	0.61982		0.78997	0.63384
0.4452	0.71407		0.46032	0.7462		0.32244	0.45203		0.69274	0.20125		0.41925	0.63145		0.7626	0.61446
0.4453	0.57564		0.38902	0.74547		0.32006	0.45219		0.69267	0.20126		0.3155	0.64073		0.81036	0.71021
0.44539	0.48052		0.58452	0.74527		0.47081	0.45225		0.6926	0.20138		0.23813	0.58525		0.84773	0.57185
0.44552	0.4686		0.42645	0.74525		0.35915	0.45235		0.69246	0.20156		0.25285	0.58123		0.83091	0.65383
0.44556	0.51933		0.56794	0.74522		0.41031	0.45254		0.69209	0.20168		0.29464	0.68395		0.82761	0.53737
0.44558	0.63204		0.48919	0.74519		0.40501	0.45306		0.69202	0.20191		0.25887	0.63673		0.78522	0.62121
0.44558	0.47482		0.46308	0.74474		0.37147	0.45309		0.69195	0.20191		0.29449	0.57285		0.83326	0.59936
0.44585	0.61719		0.55765	0.74458		0.59122	0.45312		0.69182	0.20193		0.29434	0.62575		0.828	0.66037
0.44617	0.54782		0.44712	0.74412		0.43654	0.45334		0.69178	0.20202		0.30828	0.60172		0.79574	0.582
0.44622	0.6323		0.47497	0.74409		0.30864	0.45385		0.69165	0.20212		0.23827	0.57248		0.80969	0.56641
0.44625	0.50556		0.51919	0.74408		0.43169	0.45431		0.69161	0.20222		0.41018	0.60059		0.77395	0.61483
0.44639	0.61045		0.39058	0.74407		0.36722	0.45433		0.69145	0.20225		0.50638	0.62492		0.81156	0.60544
0.44653	0.52218		0.58287	0.74352		0.46061	0.45454		0.69144	0.2025		0.50433	0.60356		0.73336	0.63858
0.44657	0.52106		0.55103	0.74311		0.65887	0.45607		0.69131	0.2025		0.47586	0.59065		0.77625	0.59798
0.44662	0.61198		0.45552	0.74294		0.62603	0.45666		0.69121	0.20254		0.47967	0.60823		0.83844	0.58601
0.44671	0.62886		0.52234	0.74292		0.41698	0.45683		0.69117	0.20278		0.47328	0.63849		0.79826	0.67487
0.44674	0.6294		0.53485	0.74287		0.51425	0.45696		0.69109	0.20285		0.46218	0.59827		0.84665	0.76092
0.44702	0.5719		0.68469	0.74268		0.47849	0.45734		0.69104	0.20292		0.4534	0.66287		0.79798	0.59339
0.44717	0.6152		0.4973	0.74175		0.34955	0.45792		0.69103	0.20304		0.49911	0.68391		0.88864	0.47072
0.44737	0.60206		0.5646	0.74141		0.49538	0.45799		0.69088	0.2032		0.34429	0.64771		0.77467	0.57135
0.44753	0.66246		0.43453	0.74101		0.70834	0.45801		0.69087	0.20327		0.46143	0.73724		0.83126	0.5897
0.44769	0.64371		0.53388	0.74101		0.68106	0.45807		0.6907	0.20332		0.43758	0.63747		0.85729	0.56984
0.44785	0.65586		0.4519	0.74083		0.64659	0.4581		0.69016	0.20338		0.47002	0.61191		0.77841	0.64983
0.44797	0.70259		0.51344	0.74063		0.66899	0.45817		0.68986	0.2034		0.38289	0.60066		0.86303	0.55197
0.44801	0.53993		0.55134	0.73994		0.6497	0.45828		0.68983	0.2034		0.38109	0.71558		0.85153	0.48489
0.44818	0.52104		0.55243	0.7399		0.62384	0.4584		0.68967	0.20343		0.38905	0.6406		0.79731	0.55193
0.44842	0.56634		0.40323	0.73959		0.4686	0.45841		0.68958	0.2036		0.4469	0.63547		0.80091	0.61649
0.44874	0.66347		0.5139	0.73949		0.57251	0.45859		0.68934	0.20368		0.47357	0.65543		0.83888	0.58721
0.44884	0.60623		0.54607	0.73934		0.50601	0.45871		0.68932	0.20381		0.43903	0.5603		0.73464	0.70272
0.44887	0.5907		0.42235	0.73928		0.64707	0.45878		0.68925	0.20381		0.43496	0.50854		0.85867	0.64481
0.44892	0.66582		0.48357	0.73907		0.61858	0.45891		0.6892	0.20403		0.44519	0.59382		0.86111	0.62587
0.44904	0.49261		0.54783	0.73874		0.6811	0.45963		0.68919	0.20404		0.35592	0.67616		0.79594	0.64109
0.44912	0.61939		0.51702	0.73868		0.69298	0.46003		0.68914	0.2041		0.33468	0.57113		0.75103	0.62735
0.44918	0.62964		0.46029	0.73835		0.60293	0.4601		0.6891	0.20428		0.35469	0.60711		0.85589	0.60047
0.44969	0.6694		0.57316	0.73823		0.54058	0.46019		0.68902	0.20441		0.34996	0.5434		0.78505	0.63522
0.44982	0.56407		0.63445	0.73822		0.54338	0.46038		0.68885	0.20442		0.29825	0.52328		0.89704	0.69127
0.4499	0.49545		0.44929	0.73818		0.40844	0.4606		0.6887	0.20448		0.31308	0.53486		0.81735	0.5704
0.44998	0.44804		0.57112	0.73794		0.66888	0.4606		0.68843	0.20448		0.41213	0.51031		0.80994	0.70381
0.45023	0.67447		0.49334	0.73768		0.6428	0.46068		0.6884	0.20486		0.35481	0.54395		0.76349	0.60925
0.4504	0.6051		0.52896	0.73761		0.69845	0.46071		0.68791	0.20491		0.46804	0.65322		0.78876	0.5599
0.45051	0.49741		0.44126	0.73716		0.60697	0.46085		0.68785	0.20494		0.46702	0.62536		0.73924	0.52849
0.45059	0.39215		0.43679	0.73715		0.7013	0.4609		0.6878	0.20498		0.42929	0.57583		0.71166	0.48931
0.45077	0.58185		0.59645	0.73707		0.63862	0.46125		0.68775	0.20505		0.36217	0.57944		0.7948	0.63877
0.45088	0.67089		0.56816	0.73704		0.72512	0.46239		0.68735	0.2052		0.40803	0.59211		0.77013	0.60559
0.4509	0.58584		0.56389	0.73686		0.63434	0.46257		0.68723	0.20522		0.42408	0.62144		0.89648	0.70859
0.45091	0.5671		0.53027	0.73645		0.63409	0.46288		0.68703	0.20532		0.41041	0.65728		0.80342	0.66731
0.45097	0.57733		0.55194	0.73621		0.61052	0.46331		0.68699	0.20541		0.49137	0.49787		0.81462	0.71422
0.45104	0.56239		0.4932	0.73616		0.64979	0.46342		0.68669	0.20546		0.54993	0.3524		0.84278	0.65659
0.45113	0.72081		0.63915	0.73593		0.547	0.46364		0.68649	0.20547		0.51902	0.50055		0.80598	0.63844
0.45133	0.58929		0.59913	0.73562		0.52205	0.46388		0.6863	0.20556		0.51814	0.53792		0.85937	0.66149
0.45147	0.54699		0.58692	0.73559		0.74835	0.46404		0.68601	0.20572		0.42067	0.56352		0.81507	0.63874
0.45154	0.44259		0.48115	0.73537		0.64802	0.46447		0.68591	0.20575		0.41052	0.57106		0.86066	0.67103
0.45167	0.44997		0.53467	0.73507		0.74222	0.46457		0.68582	0.20576		0.46482	0.49905		0.81255	0.70627
0.45184	0.51158		0.55799	0.73492		0.58885	0.46562		0.68581	0.20577		0.45454	0.46206		0.81039	0.69355
0.45192	0.52114		0.44219	0.73469		0.63219	0.46586		0.68575	0.2059		0.3899	0.61291		0.74776	0.62892
0.4521	0.44069		0.59131	0.73456		0.60211	0.46597		0.68557	0.206		0.44794	0.71291		0.821	0.63821
0.45213	0.50513		0.53916	0.73443		0.4555	0.46609		0.68548	0.20631		0.36281	0.65851		0.80696	0.60405
0.45217	0.55359		0.43076	0.73443		0.67586	0.46718		0.68515	0.20647		0.38644	0.63242		0.85385	0.68889
0.45226	0.398		0.5644	0.73442		0.58122	0.46742		0.68504	0.2065		0.38417	0.58589		0.75248	0.634
0.45228	0.54569		0.511	0.73437		0.57548	0.46757		0.68498	0.2065		0.39453	0.64173		0.8467	0.63686
0.45234	0.55966		0.56871	0.73433		0.65263	0.4679		0.68491	0.20656		0.36717	0.65597		0.85457	0.58918
0.45243	0.63635		0.51958	0.73426		0.57922	0.46798		0.68481	0.20665		0.45216	0.66662		0.82435	0.73613
0.45251	0.43023		0.47497	0.73413		0.74512	0.46811		0.68462	0.20669		0.47926	0.59043		0.84464	0.66113
0.45252	0.4373		0.42051	0.73407		0.7131	0.46825		0.68445	0.20672		0.44137	0.65056		0.82363	0.7465
0.45261	0.54469		0.4363	0.73363		0.63866	0.46826		0.68443	0.20674		0.31061	0.61834		0.7301	0.62623
0.45283	0.52561		0.58178	0.73358		0.60766	0.46836		0.68418	0.20679		0.41793	0.55388		0.84512	0.58155
0.45293	0.76093		0.42415	0.73346		0.62385	0.46843		0.68408	0.20689		0.44058	0.62283		0.78525	0.75769
0.45297	0.58427		0.46442	0.73345		0.56439	0.46914		0.68378	0.20719		0.42092	0.6175		0.81759	0.58442
0.45313	0.56885		0.46941	0.73308		0.66017	0.46921		0.68353	0.20734		0.37164	0.55065		0.81977	0.62448
0.45352	0.54248		0.42432	0.73237		0.70425	0.46934		0.68341	0.20737		0.41278	0.5242		0.78307	0.74443
0.4536	0.69273		0.54979	0.73235		0.68114	0.46948		0.68289	0.20753		0.39982	0.65056		0.80703	0.62815
0.45363	0.6598		0.43407	0.73219		0.44396	0.46962		0.68273	0.20769		0.37813	0.55562		0.81834	0.64574
0.45371	0.54343		0.47289	0.73217		0.29547	0.46965		0.68271	0.20779		0.25353	0.67226		0.9397	0.60816
0.45383	0.61205		0.55089	0.73172		0.44722	0.46965		0.68194	0.2078		0.31454	0.62981		0.95139	0.74781
0.45401	0.64455		0.53803	0.7314		0.57534	0.46978		0.68179	0.2078		0.35879	0.61449		0.90615	0.30333
0.45444	0.48907		0.57165	0.73128		0.60764	0.47033		0.68166	0.20784		0.37185	0.59928		0.86513	0.43802
0.45486	0.57141		0.64531	0.73122		0.73253	0.47064		0.68166	0.20798		0.45473	0.50525		0.79769	0.423
0.45503	0.4247		0.7012	0.73047		0.57488	0.4708		0.68147	0.20808		0.41999	0.53312		0.84925	0.32552
0.45509	0.50024		0.54882	0.73027		0.44944	0.47084		0.68138	0.20825		0.33292	0.64925		0.82077	0.42737
0.45514	0.35669		0.62878	0.72989		0.34173	0.47097		0.68128	0.20825		0.46447	0.53301		0.71874	0.31015
0.45525	0.38112		0.59552	0.72987		0.67314	0.47105		0.68127	0.20827		0.36577	0.65602		0.76536	0.34706
0.45533	0.53505		0.60231	0.72985		0.60025	0.4712		0.68121	0.20843		0.36164	0.62774		0.74527	0.34247
0.45534	0.60109		0.54312	0.72975		0.65915	0.47132		0.68103	0.20853		0.28898	0.73762		0.85794	0.27625
0.45573	0.6959		0.62313	0.72956		0.5804	0.47165		0.68075	0.20886		0.31414	0.70379		0.74991	0.29496
0.45606	0.69089		0.68854	0.72947		0.56014	0.47176		0.68063	0.20889		0.31342	0.5889		0.85448	0.37678
0.45611	0.48983		0.63883	0.72946		0.43179	0.47184		0.68061	0.20897		0.43154	0.57549		0.77812	0.28718
0.45627	0.43189		0.52987	0.72903		0.43672	0.47209		0.6802	0.20911		0.36262	0.55221		0.78947	0.34008
0.45663	0.56797		0.66728	0.72877		0.47785	0.47209		0.68018	0.20915		0.36755	0.55015		0.77764	0.42776
0.45675	0.58993		0.70708	0.7287		0.49912	0.47236		0.68007	0.20927		0.39282	0.62169		0.80326	0.50124
0.45709	0.47418		0.68675	0.72861		0.39603	0.47236		0.68003	0.20927		0.45556	0.47586		0.85876	0.20748
0.45731	0.49205		0.57598	0.72849		0.41336	0.47287		0.67996	0.20944		0.29413	0.55335		0.82754	0.45187
0.45735	0.44814		0.65781	0.72813		0.55987	0.47294		0.67979	0.20947		0.34083	0.53517		0.76217	0.24409
0.45742	0.58529		0.6674	0.72781		0.42539	0.47329		0.67979	0.20947		0.41106	0.59063		0.77687	0.30817
0.45775	0.55034		0.55862	0.7277		0.43514	0.47337		0.67967	0.20947		0.32266	0.57693		0.7822	0.32717
0.45781	0.56563		0.63439	0.72726		0.66454	0.47348		0.67938	0.20952		0.41043	0.63625		0.77569	0.24588
0.45817	0.45438		0.56185	0.72722		0.52968	0.47373		0.67927	0.20956		0.44284	0.56569		0.80702	0.51873
0.45818	0.48787		0.6438	0.72719		0.52277	0.47422		0.67924	0.20957		0.37448	0.66945		0.77982	0.3115
0.45846	0.48245		1.0462	0.72704		0.43244	0.47452		0.67923	0.20968		0.36	0.64503		0.74097	0.47869
0.45846	0.50059		1.0297	0.72703		0.32287	0.47454		0.6792	0.20968		0.39109	0.60575		0.79425	0.33768
0.45878	0.60153		1.0431	0.72696		0.49169	0.47466		0.67902	0.20971		0.47439	0.58923		0.83495	0.38077
0.4589	0.5189		1.0363	0.72687		0.51939	0.47492		0.67888	0.20976		0.45143	0.48586		0.85404	0.33914
0.45895	0.52765		1.0414	0.7267		0.53598	0.47519		0.67869	0.20987		0.35992	0.60094		0.79389	0.27811
0.45895	0.34429		1.052	0.72662		0.46994	0.47533		0.67862	0.20991		0.49921	0.55633		0.8152	0.33351
0.45907	0.48011		1.0401	0.72655		0.3244	0.47542		0.6786	0.20992		0.62084	0.58768		0.73225	0.3815
0.45953	0.47388		1.0379	0.72647		0.24735	0.47553		0.67845	0.21005		0.72525	0.49847		0.83264	0.34298
0.45954	0.55945		1.0411	0.72636		0.26507	0.47573		0.67841	0.21006		0.74596	0.5181		0.87543	0.35126
0.45972	0.54873		1.0446	0.72611		0.17044	0.47575		0.67839	0.2101		0.60189	0.55227		0.79281	0.39875
0.45976	0.65103		1.0221	0.72609		0.23495	0.47581		0.67826	0.2101		0.48879	0.47477		0.76609	0.30645
0.46003	0.52825		1.0278	0.72575		0.23416	0.4763		0.67751	0.21018		0.37031	0.49853		0.73165	0.23531
0.46023	0.54751		1.0475	0.72556		0.18441	0.47634		0.67748	0.21021		0.40108	0.45035		0.7419	0.31573
0.46072	0.666		1.0359	0.7253		0.35956	0.47697		0.67745	0.21022		0.36118	0.4692		0.75968	0.39174
0.46081	0.60234		1.0302	0.7252		0.22808	0.47698		0.67738	0.21033		0.57688	0.37019		0.77539	0.25376
0.4611	0.68318		1.0262	0.7252		0.2342	0.47712		0.67726	0.21034		0.58965	0.3717		0.8006	0.40055
0.46114	0.5385		-26.213	0.72514		0.22993	0.47738		0.67725	0.2104		0.42793	0.57869		0.77965	0.30024
0.46157	0.61073		-0.62266	0.72503		0.16451	0.47775		0.67707	0.21047		0.42495	0.36988		0.76594	0.36893
0.46197	0.53916		-0.2598	0.72479		0.23874	0.47784		0.67692	0.21053		0.42597	0.41897		0.88258	0.41631
0.46227	0.59425		-0.25488	0.72442		0.19166	0.47793		0.67683	0.21069		0.39934	0.5836		0.84537	0.32899
0.46231	0.66233		-0.75752	0.7243		0.21093	0.47809		0.67682	0.21077		0.40174	0.53		0.84045	0.35029
0.46243	0.60805		-0.12497	0.72423		0.17951	0.4784		0.67677	0.2108		0.41988	0.54744		0.80801	0.30325
0.46248	0.72242		-0.2066	0.72423		0.25566	0.47863		0.67676	0.21081		0.37384	0.59722		0.78258	0.31711
0.46249	0.49526		9.5911	0.72422		0.23108	0.47881		0.67656	0.21083		0.3237	0.38077		0.89579	0.30721
0.46257	0.62193		0.0062787	0.72419		0.054909	0.47917		0.67642	0.21091		0.4689	0.56128		0.76877	0.29392
0.46258	0.61313		-3.2962	0.72381		0.21718	0.47975		0.67634	0.21092		0.43265	0.43453		0.77908	0.39248
0.46263	0.63379		0.063786	0.7237		0.20285	0.48039		0.67628	0.21092		0.31495	0.62782		0.85333	0.29365
0.46265	0.52371		-0.15843	0.72337		0.21865	0.48044		0.67624	0.21117		0.40992	0.63365		0.78932	0.4847
0.46288	0.57043		-0.46531	0.7233		0.19525	0.48047		0.67615	0.21135		0.31849	0.59376		0.83372	0.38101
0.4631	0.57594		-0.46179	0.72327		0.22378	0.48058		0.67595	0.21141		0.29926	0.6752		0.43391	0.1522
0.46311	0.38269		-0.34171	0.72315		0.188	0.48088		0.67532	0.21147		0.34618	0.56677		0.61361	0.22321
0.46317	0.64093		-0.095774	0.72311		0.19323	0.48096		0.67529	0.21147		0.37154	0.55446		0.64639	0.42983
0.46344	0.53877		-0.1593	0.72287		0.1488	0.48112		0.67487	0.21149		0.38001	0.59601		0.54042	0.28812
0.46351	0.68498		-1.1223	0.72286		0.30341	0.48139		0.67461	0.21156		0.35529	0.6777		0.62952	0.33214
0.46361	0.59713		-0.31878	0.72255		0.17927	0.48141		0.67456	0.21158		0.46462	0.61235		0.58848	0.30523
0.46376	0.74393		0.099786	0.7221		0.14871	0.48151		0.67436	0.21159		0.36182	0.55641		0.5725	0.36279
0.46386	0.68662		-1.0118	0.72187		0.21242	0.48152		0.67435	0.21165		0.35971	0.58986		0.56477	0.40217
0.46403	0.60215		0.12927	0.72175		0.23942	0.4817		0.67434	0.21179		0.40304	0.57123		0.59734	0.36303
0.46403	0.62613		0.13293	0.72169		0.23453	0.48173		0.67426	0.21182		0.29384	0.58451		0.57575	0.42894
0.46438	0.65826		-0.48415	0.72148		0.20039	0.48174		0.67391	0.21192		0.30593	0.70626		0.554	0.3149
0.4644	0.59414		-0.90364	0.72145		0.22083	0.48229		0.67376	0.21208		0.33459	0.58401		0.57994	0.34379
0.46441	0.56041		-0.12661	0.72145		0.35443	0.48239		0.67362	0.21208		0.33505	0.57618		0.5194	0.33716
0.46454	0.59336		-18.451	0.72124		0.56098	0.48242		0.67362	0.21222		0.39472	0.61235		0.7015	0.38001
0.46462	0.52456		-0.82761	0.72119		0.52355	0.48304		0.67361	0.21232		0.33061	0.58174		0.60212	0.33682
0.46469	0.6676		-0.054681	0.72063		0.4159	0.48326		0.67345	0.21269		0.45681	0.61949		0.60393	0.35468
0.46481	0.71738		-0.051198	0.71994		0.41253	0.48401		0.67341	0.2127		0.32709	0.63214		0.65785	0.29449
0.46491	0.56739		-1.1073	0.7198		0.54971	0.48453		0.67333	0.21271		0.26456	0.65805		0.74446	0.27067
0.46514	0.55145		-0.54681	0.71922		0.54221	0.4848		0.67328	0.21277		0.33863	0.58759		0.64247	0.39203
0.46522	0.64052		-0.13102	0.71906		0.41433	0.48493		0.67327	0.21288		0.32586	0.59001		0.50098	0.29739
0.4653	0.50569		-1.2563	0.7189		0.53605	0.48504		0.67321	0.21288		0.48391	0.63233		0.59763	0.31335
0.46534	0.57349		-0.91919	0.71885		0.57607	0.48504		0.67307	0.21294		0.30466	0.6371		0.64613	0.38089
0.46566	0.63453		-0.39549	0.71878		0.37808	0.48514		0.67303	0.21295		0.28473	0.65871		0.64781	0.29682
0.46577	0.65428		-1.1328	0.71865		0.45702	0.48518		0.67287	0.21298		0.36174	0.51816		0.53464	0.34837
0.46603	0.6147		-0.56274	0.71863		0.44539	0.48531		0.67281	0.21302		0.26627	0.56945		1.0057	0.34549
0.46611	0.47621		-0.30116	0.71835		0.44989	0.4855		0.6726	0.21312		0.40539	0.49965		0.98602	0.31788
0.46632	0.66962		-0.017097	0.71823		0.43467	0.48556		0.67235	0.21338		0.36396	0.37428		0.62803	0.45268
0.46634	0.75023		-0.23812	0.71808		0.46091	0.48562		0.67224	0.2134		0.29894	0.65947		0.73885	0.32212
0.46638	0.64955		-3.0243	0.71735		0.54141	0.48579		0.67219	0.2136		0.30459	0.62635		0.66124	0.31898
0.46667	0.65856		-0.26554	0.71724		0.5601	0.48601		0.67188	0.21363		0.41261	0.66382		0.71084	0.25483
0.46671	0.66752		-0.8223	0.71704		0.43252	0.48608		0.67184	0.21363		0.39237	0.58927		0.74958	0.31145
0.46717	0.78787		-0.65209	0.71692		0.45075	0.48616		0.67154	0.21377		0.38222	0.65343		0.79836	0.26242
0.46727	0.6847		-0.21534	0.71652		0.41859	0.48622		0.6715	0.21391		0.43735	0.63008		0.77349	0.43241
0.46733	0.62876		-3.3955	0.71639		0.59546	0.48665		0.67127	0.21393		0.37186	0.57253		0.80349	0.32603
0.46765	0.68106		-0.30147	0.71632		0.4903	0.48693		0.67119	0.21399		0.46963	0.59021		0.83425	0.31216
0.46766	0.5478		0.038818	0.71619		0.51178	0.48722		0.6711	0.21407		0.40759	0.6174		0.59576	0.40418
0.4678	0.65547		-0.30858	0.71618		0.53345	0.48726		0.67081	0.21415		0.37235	0.67251		0.66527	0.33624
0.46783	0.6597		-1.0982	0.71583		0.51832	0.4876		0.67079	0.21424		0.31396	0.63456		0.79839	0.2891
0.46833	0.32096		-0.48044	0.71554		0.68746	0.48808		0.67078	0.21426		0.27337	0.67056		0.76444	0.29628
0.46863	0.68491		-0.049566	0.71539		0.38545	0.48827		0.67043	0.21431		0.29681	0.58371		0.66836	0.4031
0.46884	0.62087		-1.0833	0.71495		0.51529	0.48871		0.67037	0.21438		0.18618	0.53047		0.90005	0.30421
0.46889	0.61517		-0.3457	0.71479		0.40236	0.48882		0.6703	0.21442		0.28988	0.59681		0.84278	0.38951
0.46901	0.64946		-1.52	0.71442		0.5249	0.48887		0.67017	0.21465		0.52446	0.63933		0.72852	0.34304
0.46931	0.60242		-0.013598	0.71441		0.55463	0.48933		0.67017	0.21466		0.32976	0.53976		0.68077	0.37156
0.4695	0.58235		-3.3877	0.7142		0.54046	0.48941		0.67006	0.21468		0.36047	0.71108		0.70344	0.4147
0.46961	0.49863		-0.33999	0.71364		0.52566	0.48945		0.66995	0.21472		0.43181	0.58891		0.79912	0.37409
0.46966	0.67584		-0.28139	0.71361		0.50378	0.49018		0.66994	0.2152		0.29496	0.5775		0.66965	0.30816
0.4699	0.86814		-0.51231	0.71359		0.49961	0.49044		0.66993	0.21523		0.26356	0.69686		0.69315	0.30058
0.46993	0.67862		-0.69878	0.71355		0.48032	0.4905		0.66976	0.21559		0.25007	0.601		0.6893	0.35263
0.47034	0.55369		-0.50072	0.71313		0.44686	0.49114		0.66964	0.21565		0.31223	0.59052		0.74875	0.35073
0.47042	0.59624		-0.8002	0.71282		0.42101	0.4914		0.66958	0.21571		0.33132	0.38647		0.74356	0.29944
0.47046	0.71317		-0.0067034	0.71263		0.38597	0.4922		0.6691	0.21573		0.24939	0.57707		0.70136	0.33443
0.4708	0.66331		-0.15765	0.71261		0.49065	0.49267		0.66905	0.21574		0.40984	0.56717		0.83179	0.35706
0.4708	0.68018		-0.066386	0.71245		0.46319	0.49306		0.669	0.21582		0.34249	0.49976		0.68716	0.308
0.47084	0.66959		-1.1389	0.71168		0.40146	0.49347		0.66899	0.21585		0.33528	0.47979		0.61172	0.33184
0.47101	0.58489		-0.23961	0.71155		0.42587	0.4935		0.66898	0.21591		0.32482	0.50826		0.76494	0.22001
0.47103	0.61826		-0.15538	0.71149		0.43434	0.49374		0.66881	0.21596		0.37415	0.65945		0.80125	0.38073
0.47106	0.61466		-0.97715	0.7114		0.52724	0.49392		0.66872	0.21614		0.53664	0.73506		0.75193	0.41249
0.47114	0.57317		-11.233	0.71115		0.63065	0.494		0.66863	0.2162		0.42887	0.81707		0.70682	0.33591
0.47118	0.67634		-0.61483	0.71074		0.53334	0.49404		0.66837	0.21621		0.34671	0.68477		0.69266	0.39842
0.47118	0.62416		-0.27336	0.71048		0.53529	0.49433		0.66836	0.21624		0.38936	0.6526		0.84806	0.38497
0.47138	0.56623		-0.085964	0.71045		0.60298	0.49436		0.66799	0.21632		0.49752	0.61642		0.87438	0.3866
0.47155	0.62232		-0.34101	0.71044		0.51951	0.49453		0.66781	0.21635		0.5152	0.66457		0.88245	0.24187
0.47171	0.51256		-0.25191	0.71017		0.36338	0.49495		0.66746	0.21636		0.46933	0.64661		0.78755	0.3389
0.47178	0.58115		0.035442	0.71016		0.54381	0.49536		0.66743	0.21653		0.51863	0.54189		0.68087	0.29198
0.47187	0.65365		-0.45695	0.71009		0.48426	0.49541		0.66742	0.21655		0.42655	0.56965		0.67614	0.30231
0.47222	0.59978		-1.3553	0.71008		0.48196	0.49602		0.66737	0.2166		0.40977	0.53463		0.67244	0.39366
0.47223	0.56747		0.014659	0.70977		0.36545	0.49622		0.66724	0.21664		0.28257	0.63112		0.71782	0.33781
0.47262	0.54899		-0.73988	0.70963		0.50681	0.49655		0.66711	0.21677		0.40899	0.64902		0.65524	0.34986
0.4727	0.67412		-0.24452	0.7095		0.45691	0.49677		0.66686	0.2168		0.50086	0.56216		0.69227	0.41442
0.47285	0.60261		-0.50712	0.70931		0.47108	0.4969		0.66674	0.21684		0.3853	0.53475		0.78303	0.3974
0.4729	0.56204		-0.41182	0.70917		0.47587	0.49701		0.66656	0.21696		0.37932	0.52757		0.71773	0.3575
0.47317	0.73537		-0.82903	0.70901		0.47988	0.49705		0.66651	0.21728		0.30412	0.61762		0.74027	0.35669
0.47345	0.56262		0.021162	0.70897		0.53878	0.49779		0.66645	0.21737		0.40872	0.62055		0.72759	0.41153
0.47357	0.52783		-0.96568	0.70881		0.65391	0.49781		0.66594	0.21741		0.38976	0.60073		0.82744	0.34441
0.47359	0.54335		-0.71728	0.70879		0.7212	0.49783		0.66588	0.21743		0.29486	0.60761		0.77489	0.31014
0.4737	0.71632		-0.10344	0.70873		0.59143	0.49849		0.6658	0.21752		0.3629	0.50474		0.73451	0.36574
0.474	0.51662		-1.2169	0.70861		0.47283	0.49919		0.66578	0.21759		0.49758	0.64485		0.64337	0.3055
0.47408	0.54338		-0.64615	0.70849		0.41218	0.49928		0.66573	0.21778		0.37073	0.39242		0.66708	0.29463
0.47415	0.60783		-0.43988	0.70773		0.4597	0.49939		0.66572	0.21784		0.36342	0.55966		0.6888	0.26515
0.47439	0.60293		-0.75057	0.70771		0.46161	0.4998		0.66571	0.21785		0.37498	0.70999		0.55277	0.36922
0.47441	0.69412		-1.727	0.70767		0.49854	0.49998		0.66568	0.21792		0.40489	0.58395		0.60981	0.36691
0.47452	0.59975		-0.27381	0.70765		0.46444	0.50036		0.66563	0.21798		0.56209	0.60498		0.57045	0.40968
0.47461	0.63361		0.041737	0.70741		0.62635	0.50044		0.66561	0.21811		0.58227	0.67442		0.88876	0.36573
0.47477	0.75192		-0.1877	0.70739		0.55264	0.50047		0.66549	0.21812		0.35278	0.66923		0.64147	0.38071
0.47477	0.65283		-1.2827	0.70731		0.52498	0.50067		0.6653	0.21812		0.40431	0.63653		0.5959	0.33532
0.47491	0.52391		-0.46539	0.70711		0.51145	0.50076		0.66528	0.21819		0.34968	0.59864		0.73737	0.46985
0.47498	0.62007		0.064909	0.70699		0.50122	0.50102		0.66521	0.21821		0.25958	0.6893		0.88217	0.35748
0.47507	0.67562		-0.33423	0.70694		0.43611	0.50108		0.66502	0.21823		0.44056	0.62219		0.80862	0.33189
0.4755	0.61951		-0.12933	0.70675		0.45999	0.50148		0.66492	0.21833		0.5491	0.62675		0.81699	0.31973
0.47564	0.58238		0.073957	0.70671		0.40429	0.50156		0.66486	0.21835		0.54238	0.6219		0.85034	0.31327
0.47572	0.68245		-1.3545	0.70655		0.51048	0.50165		0.6647	0.21843		0.51104	0.64127		0.85038	0.37287
0.47577	0.64922		-0.10507	0.70652		0.45906	0.50169		0.6644	0.2186		0.51256	0.66235		0.77025	0.27754
0.47607	0.70621		0.087392	0.70616		0.82809	0.5017		0.66407	0.21861		0.51024	0.59527		0.71595	0.38254
0.47611	0.68145		-0.68261	0.70597		0.54748	0.50194		0.66397	0.21862		0.3585	0.71538		0.8018	0.43295
0.47617	0.61841		-1.712	0.70587		0.63849	0.50204		0.6639	0.21873		0.40431	0.68354		0.72853	0.27716
0.47617	0.63032		-0.15534	0.70581		0.4591	0.50231		0.66382	0.21884		0.34778	0.59909		0.82832	0.30243
0.47627	0.54729		-1.7397	0.70572		0.40635	0.50232		0.66367	0.21885		0.40568	0.59919		0.83586	0.44485
0.47628	0.53554		-0.31471	0.70553		0.45755	0.50265		0.66363	0.2189		0.40171	0.58381		0.84602	0.30193
0.47643	0.57361		-0.16935	0.70539		0.39783	0.50346		0.66358	0.21892		0.41392	0.56876		0.70964	0.40287
0.47647	0.59488		-0.50162	0.70492		0.42146	0.50413		0.6635	0.21896		0.29255	0.58735		0.81689	0.30537
0.47651	0.6009		0.15034	0.7049		0.52844	0.50429		0.66333	0.21901		0.30387	0.70495		0.84488	0.3355
0.47661	0.62538		-0.39192	0.70488		0.47848	0.50458		0.66319	0.21901		0.31431	0.71343		0.9292	0.35703
0.47667	0.66909		0.61809	0.70453		0.40821	0.50538		0.66315	0.21916		0.39689	0.64896		0.73239	0.31167
0.47672	0.58681		0.57959	0.70437		0.46964	0.50542		0.66304	0.21917		0.38607	0.58595		0.72867	0.28486
0.47694	0.67614		0.62744	0.70387		0.52669	0.50582		0.66297	0.2192		0.30148	0.58		0.94109	0.36085
0.47697	0.60631		0.61768	0.70368		0.48247	0.50585		0.66286	0.21925		0.36107	0.60772		0.67842	0.34503
0.47709	0.66529		0.62716	0.70309		0.60379	0.50594		0.6627	0.2193		0.36627	0.66715		0.76696	0.28113
0.47723	0.64367		0.69193	0.70281		0.47368	0.50671		0.6627	0.21932		0.37072	0.5855		0.731	0.29172
0.47735	0.61262		0.67824	0.70279		0.56056	0.50688		0.66221	0.21933		0.35705	0.61845		0.82869	0.39809
0.47739	0.60771		0.66187	0.70275		0.54816	0.50727		0.66205	0.21944		0.41507	0.47954		0.75913	0.40343
0.47739	0.62685		0.70919	0.70249		0.41921	0.50774		0.66182	0.21946		0.35452	0.6076		0.81105	0.37984
0.47759	0.56076		0.61937	0.70249		0.41995	0.50795		0.66179	0.21947		0.1922	0.57591		0.80235	0.3442
0.47776	0.61463		0.65141	0.70241		0.50758	0.50813		0.66165	0.21953		0.19943	0.60425		0.74006	0.28432
0.47797	0.65936		0.58742	0.7023		0.56098	0.50874		0.66159	0.21963		0.20609	0.62498		0.89173	0.32646
0.47798	0.67318		0.63948	0.70223		0.52355	0.50893		0.66152	0.21968		0.16754	0.58782		0.72448	0.41196
0.478	0.64623		0.67019	0.70223		0.4159	0.5091		0.66119	0.21972		0.18659	0.48925		0.78498	0.4391
0.47823	0.62558		0.63695	0.70213		0.41253	0.50934		0.66117	0.21972		0.17402	0.53596		0.90655	0.29137
0.47823	0.62383		0.65511	0.70193		0.54971	0.50938		0.66116	0.21974		0.12672	0.63644		0.89797	0.42717
0.47832	0.55649		0.61772	0.70189		0.54221	0.50969		0.66091	0.21977		0.20397	0.65493		0.75697	0.36859
0.47835	0.70836		0.72423	0.70157		0.41433	0.50971		0.6606	0.21979		0.23773	0.59785		0.83137	0.39353
0.47837	0.62015		0.73197	0.70148		0.53605	0.50975		0.6606	0.21984		0.15315	0.39615		0.81977	0.24469
0.47855	0.61349		0.73258	0.70133		0.57607	0.50996		0.66057	0.21997		0.16002	0.57802		0.78062	0.29281
0.47864	0.63857		0.62457	0.70132		0.37808	0.51016		0.6602	0.22002		0.23392	0.613		0.87982	0.29613
0.47865	0.64903		0.56942	0.70122		0.45702	0.51071		0.66007	0.22016		0.19075	0.66745		0.82829	0.38681
0.4787	0.56821		0.6585	0.70078		0.44539	0.51102		0.65996	0.22022		0.22195	0.53466		0.82021	0.36601
0.4789	0.46245		0.69101	0.70068		0.44989	0.51103		0.6598	0.22024		0.21447	0.51634		0.79388	0.32437
0.47902	0.53055		0.64038	0.70015		0.43467	0.51121		0.65975	0.22024		0.13598	0.56744		0.77722	0.2519
0.47928	0.64783		0.58419	0.70002		0.46091	0.51125		0.6596	0.22035		0.1772	0.4405		0.82055	0.34891
0.47948	0.5695		0.65637	0.69989		0.54141	0.51135		0.65958	0.22045		0.20909	0.41231		0.79051	0.28563
0.47952	0.52656		0.67739	0.69983		0.5601	0.51213		0.65934	0.22051		0.18562	0.61363		0.88398	0.3864
0.47966	0.58843		0.71762	0.69981		0.43252	0.51218		0.65933	0.22058		0.19993	0.58432		0.77685	0.35177
0.48	0.54306		0.69612	0.69968		0.45075	0.51264		0.65909	0.2206		0.14961	0.63871		0.81626	0.31699
0.48009	0.63719		0.62757	0.69955		0.41859	0.51272		0.65904	0.22071		0.23566	0.66179		0.8038	0.37818
0.48018	0.63934		0.67276	0.69921		0.59546	0.51309		0.6589	0.22081		0.22631	0.54294		0.78415	0.42677
0.48029	0.61633		0.59549	0.69913		0.4903	0.51412		0.65871	0.22088		0.20212	0.6142		0.82022	0.249
0.48036	0.60111		0.65946	0.69911		0.51178	0.51413		0.65854	0.22091		0.18886	0.47291		0.8519	0.37955
0.48106	0.58755		0.58365	0.69888		0.53345	0.5147		0.65849	0.22091		0.23092	0.57982		0.89694	0.42788
0.48107	0.69073		0.62803	0.69881		0.51832	0.51484		0.65828	0.22101		0.22361	0.61354		0.7713	0.38997
0.48108	0.63242		0.6119	0.69867		0.68746	0.5149		0.65816	0.22104		0.16225	0.6077		0.86961	0.37673
0.48113	0.63453		0.66311	0.69746		0.38545	0.51505		0.65798	0.22105		0.16259	0.5864		0.90962	0.40423
0.48125	0.60311		0.63577	0.69741		0.51529	0.51509		0.65779	0.22106		0.15642	0.60387		0.83915	0.33208
0.48155	0.6404		0.38259	0.69698		0.40236	0.51535		0.65772	0.22113		0.21548	0.59673		0.85149	0.34658
0.48162	0.56663		0.29706	0.69682		0.5249	0.51608		0.65744	0.2212		0.17806	0.62328		0.82827	0.29732
0.48183	0.56442		0.34757	0.69673		0.55463	0.51609		0.65733	0.22125		0.19806	0.57809		0.78083	0.38685
0.48207	0.70051		0.37744	0.69646		0.54046	0.51644		0.65728	0.22127		0.1853	0.66568		0.84056	0.28472
0.48219	0.6617		0.41861	0.69619		0.52566	0.51651		0.65726	0.22143		0.16911	0.67208		0.71718	0.40506
0.48231	0.86749		0.36497	0.69618		0.50378	0.51659		0.65725	0.22144		0.25847	0.60643		0.82065	0.365
0.48248	0.70738		0.38908	0.69606		0.49961	0.51707		0.65723	0.22146		0.19334	0.5765		0.82589	0.39006
0.48252	0.66791		0.37971	0.69602		0.48032	0.5171		0.65713	0.22148		0.18306	0.61717		0.72959	0.43629
0.48256	0.44504		0.39449	0.69585		0.44686	0.5173		0.65701	0.2216		0.13119	0.64801		0.78202	0.532
0.4833	0.53225		0.35618	0.69563		0.42101	0.51731		0.65697	0.22162		0.24691	0.69295		0.69833	0.37711
0.48336	0.50168		0.38086	0.69539		0.38597	0.51802		0.65677	0.22178		0.23172	0.49147		0.82009	0.45438
0.48343	0.47764		0.44487	0.69536		0.49065	0.51804		0.65662	0.2218		0.30791	0.62529		0.70399	0.32739
0.48343	0.49177		0.39425	0.69527		0.46319	0.51829		0.65648	0.22184		0.17947	0.56322		0.80513	0.44294
0.48344	0.44807		0.48021	0.69504		0.40146	0.51842		0.65643	0.22188		0.23753	0.61588		0.73989	0.40955
0.48346	0.57382		0.43987	0.69501		0.42587	0.5186		0.65627	0.22188		0.21479	0.56235		0.79212	0.36358
0.48373	0.52999		0.42121	0.69471		0.43434	0.51895		0.65602	0.2219		0.26979	0.65856		0.72679	0.35521
0.48408	0.57423		0.37978	0.69441		0.52724	0.51935		0.6559	0.22192		0.23049	0.58338		0.795	0.33589
0.48479	0.53977		0.33502	0.69416		0.63065	0.51935		0.65573	0.22195		0.19725	0.55763		0.82971	0.40361
0.48523	0.69814		0.3698	0.69394		0.53334	0.51978		0.65571	0.22195		0.20672	0.67075		0.8179	0.41487
0.48523	0.47701		0.35123	0.6935		0.53529	0.51997		0.65564	0.22199		0.29505	0.62046		0.78439	0.32924
0.48631	0.48706		0.42	0.69326		0.60298	0.51998		0.65561	0.22218		0.27874	0.61239		0.80769	0.27538
0.48641	0.49521		0.43566	0.69316		0.51951	0.52018		0.65553	0.22225		0.23849	0.61605		0.745	0.43979
0.48654	0.51445		0.39232	0.6931		0.36338	0.5202		0.65541	0.22237		0.15404	0.62918		0.84482	0.40355
0.48655	0.52514		0.3157	0.69272		0.54381	0.52057		0.65509	0.2224		0.20037	0.62833		0.77937	0.33392
0.48658	0.52347		0.4129	0.69262		0.48426	0.52066		0.65468	0.22248		0.19029	0.53675		0.87511	0.40791
0.48678	0.49716		0.39398	0.69244		0.48196	0.52093		0.65464	0.22251		0.23781	0.64511		0.74289	0.42675
0.48688	0.6329		0.36337	0.69207		0.36545	0.52122		0.65435	0.22272		0.23207	0.554		0.77417	0.51001
0.487	0.60537		0.45039	0.69191		0.50681	0.52146		0.6542	0.22285		0.18478	0.58969		0.77292	0.45018
0.48702	0.57865		0.36448	0.69183		0.45691	0.52146		0.65393	0.22295		0.18662	0.6293		0.88499	0.38032
0.48726	0.48726		0.5212	0.69157		0.47108	0.52161		0.65388	0.22297		0.20597	0.54836		0.81871	0.4704
0.48747	0.52707		0.45245	0.69153		0.47587	0.52187		0.65361	0.22302		0.20348	0.62565		0.89591	0.48266
0.4876	0.50174		0.34862	0.69081		0.47988	0.52212		0.65359	0.22305		0.26002	0.65494		0.78352	0.37328
0.48784	0.38859		0.42904	0.69042		0.53878	0.52216		0.65345	0.22306		0.25012	0.59111		0.8297	0.39181
0.48785	0.49492		0.48145	0.6901		0.65391	0.52241		0.65331	0.22312		0.2012	0.56947		0.84902	0.44002
0.48793	0.56203		0.48354	0.68911		0.7212	0.52255		0.65328	0.22315		0.17118	0.62101		0.7688	0.42179
0.48795	0.56671		0.41925	0.68867		0.59143	0.52256		0.65317	0.22319		0.23647	0.61646		0.80706	0.33212
0.48841	0.53156		0.35191	0.68838		0.47283	0.52257		0.65317	0.22322		0.17708	0.5744		0.94521	0.3684
0.48855	0.55836		0.38925	0.68825		0.41218	0.52262		0.65305	0.22322		0.21325	0.58095		0.8821	0.38114
0.48864	0.51016		0.46541	0.68783		0.4597	0.52285		0.65304	0.22324		0.21345	0.52383		0.85245	0.41694
0.48884	0.48162		0.44955	0.68763		0.46161	0.5235		0.65284	0.22327		0.2024	0.58563		0.77291	0.54485
0.48888	0.33531		0.45813	0.6872		0.49854	0.52369		0.65281	0.22329		0.29284	0.60709		0.88282	0.40298
0.48909	0.51872		0.38894	0.6868		0.46444	0.5237		0.65278	0.22329		0.14388	0.61871		0.8531	0.41849
0.48911	0.57782		0.38842	0.68663		0.62635	0.52374		0.65272	0.22341		0.18285	0.62895		0.81835	0.42613
0.48929	0.49559		0.35597	0.68662		0.55264	0.52415		0.652	0.22374		0.20087	0.6117		0.74211	0.49056
0.48934	0.63453		0.38729	0.6866		0.52498	0.52419		0.65154	0.22374		0.18294	0.61276		0.70598	0.4985
0.4894	0.49899		0.2701	0.68604		0.51145	0.52456		0.65143	0.22388		0.31058	0.62721		0.74012	0.51339
0.48961	0.63772		0.34632	0.68602		0.50122	0.52458		0.6514	0.22404		0.29669	0.61261		0.72914	0.41093
0.48966	0.621		0.34672	0.68536		0.43611	0.52468		0.65133	0.22405		0.21759	0.54133		0.73652	0.53612
0.48969	0.55379		0.33031	0.68517		0.45999	0.52486		0.6512	0.22406		0.21436	0.6561		0.75611	0.45416
0.48971	0.43727		0.442	0.68444		0.40429	0.52497		0.65099	0.22407		0.20239	0.66395		0.7117	0.43865
0.48973	0.41277		0.24398	0.68438		0.51048	0.52499		0.65092	0.2241		0.29223	0.60468		0.66702	0.51751
0.48981	0.5244		0.38112	0.68438		0.45906	0.52559		0.65086	0.22415		0.23825	0.62754		0.68588	0.48923
0.48983	0.50596		0.41676	0.68434		0.82809	0.52563		0.65083	0.22431		0.235	0.62767		0.73839	0.46406
0.48998	0.41014		0.33658	0.68411		0.54748	0.52581		0.65082	0.22441		0.14751	0.59413		0.75924	0.41803
0.49024	0.49257		0.81208	0.68376		0.63849	0.52587		0.65075	0.22458		0.14466	0.63542		0.72861	0.53325
0.49025	0.48201		0.80651	0.68355		0.4591	0.52591		0.65053	0.22462		0.18036	0.58961		0.75825	0.47073
0.49047	0.60475		0.83676	0.68313		0.40635	0.52599		0.65039	0.22465		0.16672	0.60324		0.74994	0.5311
0.49048	0.53472		0.82898	0.68301		0.45755	0.52625		0.65038	0.22468		0.23901	0.58984		0.73323	0.48445
0.49052	0.50054		0.78129	0.68298		0.39783	0.5263		0.65022	0.2247		0.16544	0.59496		0.76249	0.42857
0.49075	0.40174		0.80149	0.68296		0.42146	0.52634		0.65015	0.2247		0.20795	0.60231		0.78675	0.38125
0.49083	0.46594		0.81422	0.68239		0.52844	0.52636		0.65013	0.22471		0.19198	0.62529		0.71168	0.50358
0.49098	0.45072		0.79472	0.68225		0.47848	0.52639		0.65013	0.22476		0.24742	0.58747		0.71657	0.38701
0.49131	0.54313		0.83406	0.68225		0.40821	0.52645		0.64985	0.22476		0.24526	0.6429		0.71235	0.39155
0.49144	0.40005		0.83687	0.68208		0.46964	0.52675		0.64961	0.22488		0.1805	0.65462		0.75446	0.40144
0.49147	0.35416		0.81316	0.6819		0.52669	0.52682		0.64939	0.225		0.28089	0.57419		0.77607	0.49409
0.49158	0.93212		0.82951	0.68186		0.48247	0.52698		0.6493	0.22501		0.15974	0.61847		0.80676	0.50533
0.49166	0.83296		0.80224	0.68165		0.60379	0.52711		0.64921	0.22512		0.21742	0.61984		0.7563	0.39937
0.49176	0.59905		0.78984	0.68164		0.47368	0.52786		0.64914	0.22512		0.18594	0.66158		0.64848	0.36906
0.49179	0.54364		0.83331	0.6812		0.56056	0.52791		0.64899	0.22514		0.3305	0.56201		0.81695	0.4124
0.49184	0.43014		0.80078	0.68094		0.54816	0.52793		0.64892	0.22514		0.31737	0.58153		0.71336	0.46377
0.49202	0.61575		0.78366	0.68079		0.41921	0.52796		0.64885	0.22532		0.21119	0.60294		0.70254	0.79781
0.49203	0.4752		0.79708	0.6807		0.41995	0.528		0.64857	0.22534		0.18668	0.59609		0.72164	0.88641
0.49239	0.59166		0.84356	0.67983		0.50758	0.52809		0.64854	0.22539		0.2151	0.56081		0.7967	0.7725
0.49258	0.51339		0.6094	0.67972		0.50553	0.52825		0.64848	0.22545		0.13494	0.4565		0.72241	0.77035
0.49269	0.45154		0.6785	0.67966		0.49701	0.5284		0.64846	0.22549		0.19005	0.37644		0.80471	0.83532
0.49269	0.43772		0.7427	0.67961		0.51189	0.52845		0.64823	0.22557		0.181	0.39526		0.6865	0.78311
0.49279	0.45696		0.6348	0.6796		0.56435	0.52855		0.64808	0.22558		0.22673	0.36556		0.71803	0.81334
0.49284	0.39586		0.66824	0.67941		0.51731	0.52905		0.64794	0.2256		0.38728	0.52677		0.7542	0.81401
0.49299	0.36569		0.65344	0.67913		0.52658	0.52907		0.64767	0.22561		0.32681	0.49228		0.72454	0.71033
0.49307	0.4273		0.73436	0.67862		0.55899	0.52913		0.64762	0.22567		0.66806	0.65365		0.72586	0.73112
0.49319	0.53246		0.72021	0.67829		0.49383	0.52931		0.64761	0.22573		0.53989	0.54469		0.86447	0.8119
0.49343	0.57026		0.68634	0.67822		0.5791	0.52937		0.64759	0.22576		0.27917	0.49159		0.81996	0.79659
0.49373	0.50418		0.68025	0.67797		0.61003	0.52938		0.64749	0.22587		0.27517	0.42632		0.79352	0.69494
0.49393	0.55637		0.69629	0.67796		0.42179	0.52947		0.6474	0.22602		0.24413	0.48716		0.91178	0.74206
0.49406	0.3956		0.64778	0.67788		0.53451	0.52966		0.64721	0.22606		0.2197	0.49141		0.86632	0.89547
0.49422	0.47486		0.69117	0.67782		0.51715	0.52977		0.64714	0.22612		0.27235	0.511		0.84217	0.76323
0.49443	0.35777		0.70798	0.67771		0.5154	0.52977		0.64689	0.22615		0.38722	0.59551		0.85135	0.78452
0.49495	0.47342		0.6763	0.67676		0.52737	0.5298		0.64656	0.22616		0.30759	0.58641		0.91256	0.85256
0.49513	0.45128		0.72199	0.67661		0.49305	0.52985		0.64655	0.22632		0.24687	0.61034		0.77059	0.84506
0.49522	0.50318		0.71476	0.67642		0.35978	0.53002		0.64647	0.22633		0.28411	0.62571		0.93914	0.64266
0.49526	0.38137		0.66355	0.67623		0.49185	0.53006		0.64644	0.22642		0.24256	0.63549		0.90575	0.83221
0.49534	0.39519		0.87983	0.67611		0.51768	0.53026		0.64641	0.22642		0.48424	0.66141		0.94731	0.70475
0.49546	0.44111		0.86997	0.67582		0.56886	0.53043		0.64628	0.22645		0.22944	0.62568		0.91373	0.81312
0.49559	0.55004		0.84057	0.67566		0.53223	0.53068		0.6462	0.22646		0.2418	0.53162		0.91815	0.81349
0.49559	0.55134		0.92617	0.6756		0.47229	0.53079		0.64617	0.22648		0.20552	0.46369		0.86769	0.79876
0.49617	0.66073		0.91035	0.67531		0.50548	0.53101		0.64611	0.22658		0.25565	0.47294		0.8395	0.8464
0.49622	0.34628		0.89525	0.67521		0.44769	0.53101		0.64607	0.22662		0.3295	0.46288		0.85284	0.82291
0.4966	0.45471		0.89976	0.67492		0.48075	0.5312		0.64594	0.22664		0.32484	0.44907		0.81802	0.69875
0.49668	0.539		0.87847	0.67423		0.39862	0.53122		0.64577	0.22687		0.19282	0.46341		0.8899	0.86134
0.49681	0.48868		0.90446	0.67406		0.40745	0.5314		0.64568	0.22689		0.29622	0.42087		0.92049	0.80153
0.49716	0.46269		0.84509	0.67358		0.43525	0.53156		0.64566	0.22702		0.31382	0.37449		0.93872	0.79424
0.49718	0.38625		0.90153	0.67341		0.51957	0.53169		0.64546	0.22727		0.28237	0.49883		0.91246	0.72048
0.49722	0.33287		0.88884	0.67334		0.55506	0.53212		0.64541	0.22732		0.45449	0.46551		0.79876	0.8252
0.49723	0.34313		0.84672	0.67324		0.52319	0.53222		0.64537	0.22734		0.58672	0.49188		0.85947	0.69645
0.49764	0.50576		0.86105	0.67304		0.45906	0.53257		0.64534	0.22738		0.27785	0.44379		0.88946	0.78013
0.49842	0.47897		0.87855	0.67274		0.44554	0.53266		0.64523	0.22773		0.19564	0.49622		0.84199	0.80169
0.49874	0.60857		0.83553	0.67263		0.53452	0.53271		0.6452	0.22774		0.28884	0.41868		0.8739	0.83318
0.49879	0.38931		0.91192	0.67257		0.53216	0.53275		0.64514	0.22778		0.090435	0.49507		0.89871	0.83561
0.49881	0.4538		0.855	0.67249		0.47693	0.53289		0.64508	0.22797		0.19051	0.49065		0.87189	0.68088
0.49886	0.55383		0.89261	0.67241		0.63028	0.533		0.64504	0.22804		0.30708	0.45737		0.91232	0.83832
0.49942	0.43513		0.89655	0.67231		0.58214	0.53318		0.64496	0.22806		0.30548	0.49676		0.91424	0.82338
0.49968	0.48661		0.85932	0.67231		0.57017	0.5332		0.64494	0.22807		0.39411	0.4257		0.85271	0.70141
0.49977	0.32729		0.8921	0.67218		0.50256	0.53332		0.64478	0.22807		0.20238	0.39475		0.9115	0.81959
0.49977	0.52514		0.85989	0.67212		0.82083	0.5336		0.64456	0.22807		0.21493	0.49292		0.95119	0.72692
0.49983	0.50973		0.88942	0.67197		0.52481	0.53373		0.64443	0.22821		0.26846	0.41979		0.8673	0.83766
0.50004	0.24923		0.89643	0.67178		0.48774	0.53383		0.64441	0.22825		0.22011	0.43994		0.90168	0.77666
0.50009	0.34234		0.87031	0.67121		0.45463	0.53396		0.64439	0.22826		0.5275	0.46338		0.91029	0.86682
0.50018	0.43684		0.89359	0.67104		0.49324	0.53414		0.64439	0.22836		0.34914	0.43575		0.89576	0.78787
0.50049	0.53475		0.90618	0.67092		0.53116	0.53472		0.64438	0.22854		0.16406	0.49642		0.96682	0.75984
0.50061	0.55125		0.84179	0.67072		0.36564	0.53477		0.64424	0.22856		0.275	0.39841		0.84773	0.81239
0.50063	0.43754		0.86347	0.66977		0.43389	0.53509		0.64403	0.22896		0.20172	0.45537		0.75736	0.85501
0.50066	0.52508		0.86667	0.66976		0.4689	0.53509		0.6438	0.22897		0.2673	0.70345		0.89952	0.88526
0.50093	0.39644		0.8503	0.66969		0.46549	0.53541		0.6437	0.22909		0.14883	0.61761		0.90835	0.84891
0.50094	0.36948		0.91184	0.66856		0.47669	0.53568		0.64368	0.22913		0.43337	0.66848		0.91263	0.90294
0.50121	0.45977		0.82555	0.66835		0.56808	0.5357		0.64359	0.22915		0.34667	0.6584		0.9032	0.82699
0.50176	0.40383		0.86475	0.66832		0.52321	0.53589		0.64358	0.22918		0.29162	0.7079		0.89699	0.74894
0.50178	0.52542		0.87661	0.66826		0.36238	0.53597		0.64355	0.22928		0.29489	0.6568		0.59308	-0.040539
0.50189	0.41521		0.85793	0.66793		0.46208	0.53608		0.64328	0.22942		0.33069	0.65305		0.94971	0.12953
0.50203	0.42291		0.8733	0.66771		0.48384	0.53614		0.64324	0.22944		0.33282	0.69144		0.89997	0.25239
0.50219	0.48093		0.86241	0.66736		0.51922	0.53618		0.64323	0.22947		0.30715	0.5945		0.9404	-0.503
0.50231	0.46844		0.86322	0.66733		0.55669	0.53622		0.64299	0.22952		0.49958	0.49104		0.84347	-0.026568
0.5028	0.42524		0.89918	0.66706		0.44222	0.53649		0.64299	0.22956		0.7116	0.53151		0.8471	0.19066
0.50307	0.32505		0.85967	0.66694		0.55589	0.53674		0.64289	0.22968		0.26894	0.47639		0.83109	-0.66156
0.50315	0.31027		0.81369	0.6666		0.38014	0.53677		0.64289	0.2298		0.1668	0.54851		0.84325	-0.1405
0.50317	0.46304		0.86661	0.66587		0.39414	0.53689		0.64279	0.23		0.2899	0.42007		0.92525	0.1191
0.50337	0.39742		0.8594	0.66583		0.47965	0.53698		0.64277	0.23001		0.16228	0.40963		0.88051	-0.030174
0.50341	0.32383		0.90485	0.66551		0.56046	0.53727		0.64268	0.23009		0.22494	0.61179		0.84823	-0.13251
0.50381	0.38694		0.89371	0.66525		0.47174	0.53731		0.64267	0.23015		0.70317	0.58016		0.89594	-0.31517
0.50403	0.44444		0.8936	0.665		0.5	0.53733		0.64248	0.23018		0.25307	0.59829		0.85779	0.10689
0.50427	0.4227		0.87039	0.66498		0.58498	0.53753		0.64243	0.23027		0.40424	0.64799		0.86401	0.31087
0.50456	0.46335		0.89405	0.66471		0.45484	0.53766		0.64236	0.23031		0.22926	0.64019		0.88117	-0.11158
0.50462	0.46391		0.8718	0.66445		0.37852	0.53766		0.64216	0.23052		0.42449	0.64721		0.90229	0.15912
0.50474	0.35737		0.87991	0.66428		0.45215	0.53771		0.64216	0.2306		0.19726	0.54661		0.88395	0.55899
0.50474	0.33095		0.86141	0.66403		0.4339	0.53783		0.6421	0.23066		0.20016	0.5902		0.94426	0.63517
0.50478	0.39559		0.87208	0.66395		0.44181	0.53791		0.64199	0.23069		0.26885	0.60218		0.94394	0.61478
0.50505	0.37341		0.87319	0.66389		0.42106	0.53805		0.64184	0.2307		0.28642	0.51319		0.89845	0.66448
0.50519	0.32359		0.84605	0.66374		0.34651	0.53828		0.64177	0.23078		0.18433	0.47364		0.92432	0.69079
0.50532	0.40005		0.91972	0.66351		0.46222	0.5383		0.64175	0.2308		0.22482	0.42655		0.91849	0.81048
0.50548	0.41976		0.86982	0.66332		0.42216	0.53834		0.64174	0.23083		0.17614	0.55904		0.90151	0.67283
0.50577	0.5231		0.86063	0.66311		0.44918	0.53845		0.64164	0.23099		0.26557	0.68271		0.87837	0.72522
0.50594	0.28827		0.90868	0.66284		0.41254	0.53869		0.64164	0.23103		0.24377	0.59295		0.9096	0.76736
0.50616	0.3202		0.87205	0.66207		0.44042	0.53906		0.64134	0.23106		0.61411	0.5232		0.89884	0.71227
0.50632	0.4115		0.91975	0.66192		0.40494	0.53948		0.64126	0.23109		0.25182	0.32461		0.91802	0.69348
0.50633	0.45546		0.91142	0.66173		0.43043	0.53956		0.64071	0.23118		0.25728	0.59825		0.91879	0.7064
0.50645	0.33221		0.89504	0.66171		0.48487	0.5396		0.64069	0.23132		0.23278	0.60338		0.84867	0.73411
0.50648	0.23423		0.88463	0.66152		0.40262	0.54014		0.64064	0.23139		0.26523	0.52231		0.87192	0.69383
0.50652	0.35554		0.89038	0.66084		0.52855	0.54037		0.64059	0.2314		0.26165	0.62604		0.81557	0.69943
0.50662	0.56513		0.88063	0.66078		0.37216	0.54066		0.64053	0.2314		0.32508	0.61946		0.89149	0.76364
0.50686	0.35905		0.86807	0.66069		0.53119	0.54135		0.64047	0.23144		0.29776	0.65192		0.87355	0.65021
0.50706	0.53254		0.90897	0.66049		0.45547	0.54153		0.64028	0.23148		0.27082	0.55552		0.89815	0.72842
0.50706	0.31413		0.86479	0.66008		0.49668	0.5417		0.64025	0.23148		0.34597	0.54638		0.89645	0.77342
0.50718	0.42702		0.88827	0.65989		0.52638	0.54181		0.64007	0.23162		0.19114	0.53649		0.88038	0.67908
0.50744	0.25877		0.89343	0.6598		0.42498	0.5419		0.64	0.23162		0.31731	0.67011		0.70565	0.66531
0.50775	0.29535		0.88452	0.65954		0.46552	0.54191		0.63981	0.23166		0.26565	0.66508		0.83706	0.66369
0.50796	0.56521		0.90964	0.6595		0.45764	0.54193		0.63979	0.23172		0.37269	0.5724		0.85406	0.64251
0.50798	0.51267		0.87763	0.65913		0.43121	0.54216		0.63979	0.23172		0.55634	0.59684		0.84355	0.68678
0.50802	0.39678		0.88883	0.65913		0.46355	0.54233		0.6397	0.2318		0.17278	0.47448		0.8228	0.63418
0.50808	0.2315		0.86548	0.65896		0.51381	0.54233		0.63943	0.23187		0.3019	0.54331		0.8159	0.70933
0.50859	0.4534		0.89878	0.6587		0.40615	0.54243		0.63913	0.23194		0.20303	0.39112		0.74315	0.67664
0.50877	0.3132		0.89329	0.65859		0.50848	0.54264		0.63907	0.23194		0.26673	0.59446		0.84114	0.6021
0.50878	0.41993		0.91457	0.65816		0.46516	0.54272		0.63887	0.23198		0.20011	0.43432		0.84801	0.78579
0.50892	0.37277		0.9203	0.65785		0.56954	0.54285		0.63871	0.23209		0.24375	0.55732		0.82473	0.64036
0.50903	0.4475		0.86978	0.65783		0.49002	0.54294		0.63869	0.23211		0.21677	0.58287		0.82724	0.67692
0.50907	0.4248		0.84679	0.65778		0.41191	0.54317		0.63866	0.23213		0.24455	0.69246		0.88091	0.64815
0.50922	0.40307		0.90918	0.65775		0.43649	0.54327		0.63863	0.23219		0.19146	0.56656		0.77804	0.69254
0.5093	0.34862		0.91667	0.6577		0.44976	0.54376		0.63853	0.23221		0.24794	0.62506		0.85026	0.54795
0.50933	0.40448		0.88414	0.65753		0.39367	0.54408		0.63848	0.23221		0.34999	0.60702		0.7366	0.60741
0.5099	0.43713		0.91779	0.65735		0.36233	0.54412		0.63837	0.23223		0.33218	0.4596		0.85384	0.58643
0.50993	0.47963		0.89949	0.65733		0.42827	0.54435		0.63816	0.23225		0.20701	0.61468		0.8627	0.74909
0.51002	0.42763		0.86964	0.65722		0.41395	0.54438		0.63815	0.2323		0.31256	0.51104		0.87225	0.66252
0.5101	0.20421		0.908	0.65683		0.42833	0.54445		0.6381	0.23231		0.42977	0.61359		0.76735	0.69037
0.51015	0.39192		0.6559	0.65673		0.38263	0.54448		0.63804	0.2324		0.30679	0.60598		0.83387	0.78629
0.51023	0.32035		0.60578	0.65658		0.47235	0.54457		0.63792	0.23246		0.089848	0.60395		0.89946	0.70588
0.51026	0.38982		0.65765	0.65635		0.58311	0.54459		0.63789	0.23258		0.33858	0.44646		0.82228	0.58523
0.51044	0.44579		0.70117	0.65625		0.52096	0.5446		0.63784	0.23259		0.14718	0.57513		0.85759	0.59725
0.51071	0.44805		0.71909	0.65625		0.62761	0.545		0.6378	0.23264		0.31147	0.55653		0.78829	0.68338
0.51075	0.51471		0.5753	0.65605		0.38666	0.5452		0.63773	0.23282		0.1407	0.54925		0.82009	0.67217
0.51103	0.4432		0.63183	0.65593		0.368	0.54566		0.63771	0.23283		0.34919	0.67824		0.81663	0.62665
0.51113	0.41858		0.67099	0.65557		0.44599	0.54591		0.63733	0.23299		0.30659	0.50321		0.89486	0.70998
0.51123	0.16803		0.67189	0.65546		0.44024	0.54596		0.63731	0.23302		0.21856	0.67222		0.80788	0.69131
0.51135	0.45641		0.66407	0.65517		0.49475	0.54634		0.63726	0.23303		0.25795	0.68095		0.7533	0.70922
0.51151	0.49351		0.67106	0.65482		0.40653	0.5467		0.63717	0.23303		0.26656	0.63741		0.77937	0.73238
0.51192	0.59168		0.68841	0.65457		0.50061	0.54677		0.63716	0.23314		0.20314	0.67848		0.76636	0.72474
0.51207	0.37093		0.69808	0.6545		0.46821	0.54719		0.63713	0.23318		0.38196	0.60002		0.7993	0.71264
0.51241	0.4417		0.66642	0.65442		0.41891	0.54721		0.63687	0.23338		0.22852	0.70519		0.79467	0.66714
0.51247	0.36469		0.67359	0.65427		0.46929	0.5473		0.63665	0.2334		0.35751	0.63923		0.80072	0.64364
0.51266	0.39664		0.57789	0.65415		0.45578	0.54731		0.63649	0.23341		0.30623	0.6626		0.68339	0.63264
0.51285	0.42001		0.63444	0.65391		0.41336	0.54741		0.63638	0.23342		0.5689	0.60536		0.7682	0.65005
0.51289	0.45665		0.6674	0.65384		0.55018	0.54742		0.63636	0.23343		0.70087	0.53914		0.79465	0.7167
0.51299	0.47669		0.64551	0.65377		0.46106	0.54746		0.63624	0.23344		0.75554	0.53818		0.75215	0.70041
0.51303	0.5203		0.63308	0.65365		0.42545	0.54771		0.63622	0.23345		0.50027	0.49374		0.92922	0.71815
0.51334	0.41542		0.66244	0.65341		0.49113	0.54839		0.63617	0.23353		0.42617	0.43837		0.93222	0.65856
0.51337	0.57839		0.67355	0.65305		0.42414	0.54843		0.63608	0.23355		0.74714	0.59875		0.85755	0.71027
0.51348	0.50353		0.6793	0.65301		0.51795	0.54856		0.63589	0.2336		0.22198	0.5133		0.87249	0.64051
0.51355	0.40309		0.57682	0.65295		0.36634	0.5486		0.63556	0.23372		0.19586	0.5832		0.77966	0.65209
0.51367	0.31361		0.63925	0.65287		0.48508	0.54869		0.63531	0.23381		0.21057	0.53161		0.83295	0.63119
0.51374	0.4769		0.62961	0.65249		0.46995	0.54932		0.63528	0.234		0.4653	0.53636		0.78807	0.65013
0.51385	0.3625		0.71042	0.65235		0.41362	0.54993		0.63526	0.23402		0.5795	0.56577		0.80562	0.66519
0.51403	0.52508		0.61807	0.65225		0.45871	0.54993		0.63514	0.23403		0.3282	0.58286		0.83879	0.66573
0.5143	0.34189		0.65737	0.65215		0.41599	0.54995		0.63508	0.23416		0.36808	0.54949		0.83401	0.63217
0.51452	0.41009		0.61222	0.65206		0.45203	0.55004		0.63506	0.23432		0.47798	0.61861		0.78913	0.61159
0.51458	0.34958		0.61352	0.65189		0.49822	0.55014		0.63494	0.23438		0.49135	0.30158		0.84645	0.70089
0.51491	0.35901		0.63989	0.6515		0.46656	0.55016		0.63467	0.23443		0.22881	0.55704		0.81164	0.66606
0.51498	0.47145		0.6464	0.65108		0.59554	0.55022		0.63454	0.23462		0.53176	0.57803		0.81319	0.71012
0.51526	0.37882		0.65977	0.65029		0.4816	0.55026		0.63447	0.23465		0.51976	0.54735		0.8589	0.70314
0.51538	0.32739		0.64917	0.65004		0.46351	0.55028		0.63441	0.23469		0.15836	0.60492		0.84774	0.70728
0.51548	0.33913		0.66611	0.65002		0.50906	0.55044		0.63435	0.23484		0.2344	0.64073		0.80474	0.67468
0.51548	0.41486		0.60252	0.64996		0.46144	0.55076		0.63415	0.23489		0.22454	0.61521		0.83022	0.71021
0.51549	0.31732		0.72623	0.64966		0.43716	0.55079		0.63401	0.23503		0.23283	0.45461		0.87652	0.77916
0.51556	0.31759		0.6328	0.64896		0.39122	0.55102		0.63395	0.23504		0.23211	0.60032		0.84563	0.6102
0.51557	0.36541		0.63419	0.64833		0.40357	0.55126		0.63376	0.23513		0.15486	0.58827		0.89876	0.79478
0.51573	0.41545		0.70767	0.6483		0.55812	0.55132		0.63365	0.23519		0.19725	0.49752		0.76907	0.65003
0.51575	0.39833		0.68393	0.64828		0.43313	0.55136		0.63338	0.23519		0.14368	0.66888		0.80288	0.58773
0.51614	0.4312		0.77475	0.64806		0.62943	0.55192		0.6332	0.2352		0.11258	0.63511		0.80009	0.65948
0.51618	0.39157		0.81179	0.64787		0.4031	0.55196		0.63307	0.23525		0.14887	0.51663		0.81458	0.61178
0.51624	0.36059		0.78954	0.64751		0.4747	0.55215		0.63281	0.23526		0.20599	0.59438		0.83688	0.63546
0.51627	0.45857		0.78256	0.64735		0.41424	0.55239		0.63235	0.23529		0.20704	0.6116		0.87525	0.60648
0.51628	0.41741		0.82036	0.64651		0.30035	0.55242		0.63221	0.23534		0.1884	0.62547		0.82123	0.63619
0.51639	0.50138		0.81481	0.64636		0.33926	0.55248		0.63217	0.2355		0.38269	0.63484		0.87351	0.65315
0.51676	0.47965		0.83698	0.64583		0.49832	0.55251		0.63187	0.23551		0.26254	0.65739		0.86024	0.68539
0.5168	0.58028		0.81956	0.64564		0.28105	0.55263		0.63184	0.23553		0.41107	0.64708		0.8355	0.67178
0.51701	0.5932		0.80088	0.64551		0.35493	0.55327		0.63165	0.23555		0.22799	0.64939		0.78862	0.64634
0.51701	0.42899		0.75435	0.64531		0.55773	0.55331		0.6315	0.2356		0.23336	0.57338		0.8347	0.5782
0.51717	0.49209		0.78603	0.64506		0.32531	0.55344		0.63107	0.2356		0.26593	0.48048		0.76566	0.63202
0.51764	0.53781		0.75175	0.64474		0.42713	0.55348		0.63093	0.23561		0.19522	0.4937		0.84724	0.6929
0.51764	0.59012		0.74311	0.64471		0.28878	0.55352		0.63092	0.23565		0.2806	0.61062		0.78757	0.59678
0.51765	0.50655		0.78504	0.64466		0.33206	0.55415		0.63074	0.23572		0.25278	0.51234		0.77823	0.7064
0.51787	0.51908		0.78788	0.64465		0.43644	0.55421		0.63053	0.2359		0.24229	0.58709		0.82679	0.70961
0.51797	0.45407		0.83357	0.64463		0.51477	0.55467		0.63051	0.23595		0.2391	0.517		0.82867	0.63564
0.51803	0.5785		0.7357	0.64446		0.3673	0.5547		0.63045	0.2361		0.4885	0.54449		0.80533	0.54628
0.51825	0.43261		0.81562	0.64376		0.43799	0.55518		0.63029	0.23614		0.30495	0.58548		0.83315	0.57337
0.51827	0.56145		0.82239	0.64272		0.40677	0.55536		0.63007	0.23623		0.20643	0.64251		0.82431	0.69172
0.51858	0.73599		0.86083	0.64264		0.53988	0.55555		0.63002	0.23627		0.20402	0.47173		0.81833	0.61145
0.51874	0.50681		0.7768	0.64208		0.54339	0.55564		0.62994	0.23628		0.34996	0.6413		0.82214	0.59165
0.51877	0.54261		0.81774	0.64206		0.47853	0.55565		0.62973	0.23633		0.23524	0.55807		0.82292	0.53457
0.51879	0.76878		0.80862	0.6413		0.30507	0.55569		0.62968	0.23636		0.20762	0.65282		0.88202	0.623
0.51896	0.9146		0.80773	0.64071		0.42658	0.55573		0.62959	0.23637		0.278	0.64141		0.88189	0.61686
0.51918	0.86338		0.78667	0.64039		0.56789	0.55595		0.62953	0.23638		0.41296	0.41967		0.89268	0.58669
0.51945	0.82457		0.77551	0.64026		0.49354	0.556		0.62943	0.23646		0.44363	0.5096		0.8504	0.62053
0.51983	0.76829		0.84704	0.64018		0.18401	0.55613		0.62941	0.23646		0.27835	0.44987		0.71059	0.67566
0.52002	0.64015		0.7781	0.63983		0.47473	0.55632		0.62938	0.23657		0.42987	0.6071		0.84426	0.66797
0.52015	0.85336		0.8247	0.63971		0.53214	0.55637		0.62924	0.23674		0.22493	0.60935		0.86357	0.67103
0.52017	0.84854		0.84267	0.63948		0.49167	0.5565		0.62917	0.23689		0.28957	0.46537		0.88974	0.63411
0.52032	0.8586		0.82246	0.63946		0.49526	0.55692		0.62915	0.23698		0.19549	0.59332		0.85869	0.71277
0.52071	0.8126		0.76586	0.63938		0.47096	0.55722		0.62899	0.23711		0.18852	0.49585		0.81072	0.60856
0.52076	0.80687		0.81604	0.63923		0.26979	0.55723		0.62872	0.23718		0.23584	0.54706		0.78004	0.6558
0.52087	0.75623		0.86022	0.6392		0.25732	0.55726		0.62866	0.23725		0.37668	0.5363		0.83153	0.55449
0.52115	0.63982		0.83788	0.63878		0.57052	0.55726		0.62862	0.2373		0.24093	0.60346		0.84894	0.68312
0.52122	0.68271		0.8349	0.63875		0.41212	0.55756		0.62859	0.2374		0.20606	0.46328		0.84844	0.60692
0.52129	0.79045		0.81463	0.63869		0.34079	0.55757		0.62845	0.23744		0.12444	0.66015		0.85707	0.60155
0.52159	0.82748		0.82786	0.63867		0.39009	0.5578		0.62844	0.23747		0.24822	0.68347		0.80837	0.6551
0.52162	0.76001		0.82456	0.63861		0.43387	0.55786		0.62821	0.23763		0.1625	0.64816		0.84393	0.64718
0.52174	0.71509		0.82409	0.63834		0.49736	0.55787		0.62817	0.23764		0.28905	0.63332		0.85907	0.59136
0.52181	0.82881		0.81948	0.63828		0.37798	0.55851		0.62814	0.23775		0.28279	0.61489		0.79645	0.6455
0.52238	0.64555		0.78283	0.63823		0.12154	0.55866		0.62805	0.23778		0.3861	0.62724		0.85831	0.6172
0.52256	0.86205		0.76977	0.63805		0.094505	0.5588		0.62803	0.23782		0.42822	0.5942		0.83978	0.64615
0.52284	0.78796		0.80766	0.63768		0.060067	0.55896		0.62787	0.23787		0.30394	0.3154		0.87734	0.69996
0.52287	0.67397		0.8086	0.63767		0.07766	0.55981		0.62785	0.2379		0.305	0.57104		0.85662	0.6093
0.52322	0.78264		0.76273	0.63737		0.12669	0.56016		0.6278	0.23794		0.17938	0.16756		0.79929	0.66867
0.52351	0.91855		0.74353	0.63721		0.087744	0.56035		0.62768	0.23808		0.19967	0.18954		0.80846	0.62313
0.52357	0.70038		0.69716	0.63716		0.13443	0.56067		0.62762	0.23809		0.18799	0.22888		0.86474	0.63579
0.52379	0.76918		0.73647	0.63691		0.087172	0.56077		0.6276	0.2381		0.34861	0.18981		0.83395	0.65792
0.5239	0.7482		0.77546	0.63689		0.10986	0.56084		0.62757	0.23825		0.14245	0.15115		0.81468	0.59492
0.524	0.79425		0.41863	0.63688		0.11701	0.56091		0.62748	0.23833		0.23247	0.25438		0.82268	0.66679
0.5241	0.71449		0.43279	0.63664		0.085615	0.56095		0.62747	0.23842		0.23058	0.20679		0.80385	0.56869
0.52426	0.79038		0.3447	0.6365		0.12415	0.56098		0.62746	0.23844		0.2923	0.15295		0.80093	0.64499
0.52434	0.75089		0.36932	0.63647		0.081202	0.56101		0.62744	0.23845		0.33356	0.22324		0.82623	0.68703
0.52464	0.78026		0.35047	0.63615		0.087989	0.56107		0.62743	0.23851		0.2354	0.22124		0.82561	0.65342
0.52466	0.86788		0.42182	0.63573		0.090781	0.56112		0.62742	0.23853		0.21594	0.19343		0.82021	0.66283
0.52473	0.71552		0.42651	0.6357		0.13764	0.56162		0.62737	0.23853		0.30251	0.20341		0.78718	0.63657
0.52474	0.62349		0.38689	0.63502		0.12234	0.56203		0.6273	0.23872		0.24785	0.20436		0.86751	0.64724
0.52477	0.62538		0.373	0.6349		0.094791	0.56209		0.62722	0.23875		0.21058	0.18806		0.7806	0.66158
0.52482	0.82086		0.39429	0.63409		0.088967	0.56239		0.62713	0.23876		0.26571	0.18556		0.83605	0.63412
0.52482	0.84844		0.56572	0.63401		0.081416	0.56251		0.62697	0.23879		0.33856	0.15679		0.82962	0.76513
0.52498	0.80219		0.50369	0.63396		0.11407	0.56256		0.62696	0.23882		0.29397	0.1902		0.84086	0.70766
0.52518	0.75638		0.62308	0.63384		0.061805	0.56274		0.62689	0.23883		0.28559	0.20903		0.86054	0.67494
0.52524	0.90369		0.48649	0.63361		0.051585	0.56302		0.62673	0.23885		0.27792	0.19958		0.79253	0.81014
0.5255	0.86457		0.50875	0.63337		0.084418	0.56302		0.6267	0.2389		0.52709	0.1491		0.83864	0.80351
0.52564	0.84204		0.49011	0.63327		0.074905	0.56333		0.62666	0.23892		0.28252	0.23743		0.81729	0.6132
0.52565	0.84857		0.53803	0.63305		0.050182	0.56345		0.62651	0.23903		0.28813	0.15354		0.80865	0.83474
0.52586	0.76035		0.54507	0.63278		0.12694	0.56365		0.62635	0.23922		0.2395	0.20291		0.78934	0.68745
0.52605	0.9013		0.4819	0.63272		0.09718	0.56399		0.62624	0.23922		0.28926	0.22535		0.80394	0.77
0.5261	0.7024		0.45792	0.63258		0.078209	0.56418		0.62621	0.23927		0.21625	0.20474		0.8183	0.7831
0.52611	0.65977		0.5127	0.63142		0.10156	0.56433		0.62618	0.2395		0.16417	0.21862		0.72354	0.6537
0.52611	0.68132		0.55488	0.63083		0.057717	0.56438		0.62614	0.23954		0.23355	0.18774		0.7993	0.79723
0.52616	0.53711		0.47845	0.63036		0.11591	0.56506		0.62605	0.23957		0.30422	0.19527		0.67076	0.70765
0.52622	0.55632		0.46838	0.62977		0.11789	0.56523		0.62605	0.23967		0.20771	0.21874		0.71398	0.74746
0.52655	0.6107		0.53311	0.62969		0.13134	0.5653		0.62599	0.23977		0.2984	0.23604		0.71639	0.68033
0.52673	0.59799		0.52708	0.62965		0.099937	0.56535		0.62584	0.23979		0.14974	0.22675		0.65685	0.71147
0.52691	0.50726		0.52267	0.6296		0.85539	0.5654		0.62582	0.23979		0.28682	0.16289		0.78266	0.84472
0.52726	0.5987		0.52568	0.62951		0.92562	0.5654		0.62552	0.24011		0.37472	0.21917		0.82832	0.68392
0.52732	0.53094		0.43427	0.62944		0.86593	0.56546		0.62541	0.24021		0.070173	0.19581		0.82426	0.60977
0.52734	0.62698		0.52365	0.62925		0.82816	0.56551		0.62537	0.24031		0.1005	0.14314		0.80123	0.88786
0.52743	0.53396		0.52323	0.62885		0.74475	0.56562		0.62532	0.24032		0.15809	0.15988		0.88717	0.64316
0.52757	0.5992		0.45212	0.6288		0.83112	0.56769		0.62494	0.24042		0.10493	0.14126		0.72239	0.68756
0.52765	0.64392		0.52153	0.62869		0.85	0.5678		0.62428	0.24042		0.1682	0.2043		0.7452	0.77546
0.52767	0.62402		0.51079	0.62868		0.85014	0.56787		0.62428	0.24045		0.13249	0.17921		0.77996	0.83952
0.52817	0.57211		0.50108	0.62864		0.82002	0.56813		0.62426	0.24072		0.10018	0.19602		0.7556	0.73913
0.52817	0.8215		0.57175	0.62844		0.82617	0.56818		0.62422	0.24086		0.15149	0.17534		0.82171	0.94378
0.52819	0.71044		0.56178	0.62843		0.79481	0.56828		0.62415	0.24093		0.13274	0.17698		0.77721	0.55228
0.52865	0.57762		0.53577	0.62839		0.77697	0.56854		0.62404	0.24099		0.098082	0.21462		0.97844	0.80349
0.52886	0.67164		0.46532	0.62831		0.81697	0.5688		0.62397	0.24101		0.13464	0.19304		0.97431	0.91348
0.52904	0.52753		0.46961	0.62795		0.79989	0.56953		0.62378	0.24113		0.14261	0.1845		0.97558	0.59295
0.52911	0.6346		0.57144	0.62775		0.78822	0.56958		0.6235	0.24114		0.14319	0.18761		0.99343	0.6745
0.52933	0.51278		0.53427	0.62757		0.78853	0.56969		0.62332	0.24115		0.17292	0.16086		0.97778	0.8048
0.52938	0.58681		0.53551	0.62738		0.71057	0.56976		0.62332	0.24116		0.072287	0.27636		0.96364	0.73623
0.52941	0.72797		0.54104	0.62735		0.79475	0.56979		0.62322	0.24122		0.12071	0.18836		0.95665	0.7936
0.52968	0.55649		0.56757	0.6273		0.89379	0.5698		0.62318	0.24125		0.13099	0.19098		0.98965	0.84164
0.53035	0.61395		0.55583	0.62657		0.82932	0.56985		0.62309	0.2413		0.11073	0.24253		0.98573	0.79597
0.53058	0.57228		0.48593	0.62574		0.82194	0.56993		0.62304	0.24147		0.11094	0.14364		0.96741	0.72609
0.53059	0.52003		0.52624	0.62533		0.84771	0.57028		0.6229	0.24149		0.15929	0.16808		1.0072	0.68343
0.53108	0.61317		0.50668	0.62522		0.84474	0.5705		0.62281	0.2415		0.17157	0.1612		0.96294	0.84391
0.53111	0.60629		0.51733	0.6251		0.8522	0.57051		0.62256	0.24158		0.084984	0.18688		0.99629	0.80109
0.53115	0.57557		0.51577	0.625		0.85646	0.57125		0.62255	0.24169		0.18076	0.21292		1.0091	0.76131
0.53137	0.56684		0.52785	0.62493		0.84393	0.57146		0.62253	0.24174		0.12688	0.23645		0.99895	0.75064
0.53151	0.61002		0.58545	0.62447		0.84373	0.57146		0.62252	0.24179		0.14789	0.20348		0.98566	0.65638
0.53172	0.61877		0.47612	0.6238		0.81779	0.57161		0.6224	0.24189		0.16386	0.20274		1.0049	0.61782
0.53191	0.48777		0.50985	0.62371		0.82877	0.57167		0.62225	0.2419		0.14094	0.18968		1.0156	0.71187
0.53196	0.64344		0.56811	0.62339		0.86048	0.57194		0.62217	0.2419		0.11999	0.24974		1.0233	0.83504
0.53202	0.54522		0.51815	0.62336		0.82003	0.57209		0.62203	0.24199		0.15537	0.24084		0.99709	0.89402
0.53239	0.5867		0.4679	0.62294		0.87822	0.57215		0.62189	0.242		0.1445	0.18723		0.94857	0.76658
0.53244	0.62798		0.43817	0.62288		0.84676	0.57241		0.62173	0.24203		0.11572	0.21892		0.98573	0.75511
0.5325	0.60603		0.50681	0.62266		0.76386	0.57256		0.62168	0.24207		0.11516	0.27507		0.98713	0.55741
0.53274	0.48756		0.47886	0.6224		0.88064	0.57276		0.62151	0.24208		0.10504	0.17264		1.0056	0.87338
0.53308	0.50871		0.49475	0.62226		0.79218	0.57298		0.6215	0.2421		0.12332	0.23506		1.001	0.71778
0.53321	0.58474		0.48796	0.62208		0.81382	0.57303		0.62147	0.24217		0.23192	0.24696		1.0119	0.79293
0.53343	0.5719		0.53902	0.62175		0.81807	0.57328		0.62145	0.24217		0.18937	0.19469		0.99803	0.57606
0.53356	0.53435		0.48731	0.62156		0.83585	0.5736		0.62131	0.24221		0.19686	0.15452		0.98947	0.52076
0.53359	0.4937		0.52045	0.62153		0.80226	0.57365		0.62122	0.24238		0.17743	0.23836		1.0006	0.58779
0.53399	0.53925		0.49703	0.62135		0.82988	0.57373		0.62121	0.24239		0.17707	0.2139		1.0027	0.57905
0.53404	0.51166		0.48107	0.62094		0.85174	0.57402		0.62113	0.24245		0.12891	0.22217		0.99996	0.46015
0.53414	0.6371		0.48871	0.62093		0.82766	0.57403		0.62088	0.24246		0.14535	0.22589		1.012	0.61339
0.53416	0.50717		0.51569	0.62087		0.82252	0.57407		0.6208	0.24248		0.15734	0.20508		0.98702	1.0989
0.53517	0.51242		0.45123	0.62076		0.8402	0.57413		0.62078	0.24254		0.22309	0.20768		0.98791	0.76841
0.53543	0.51981		0.52132	0.6205		0.84542	0.57415		0.62067	0.24258		0.16994	0.25283		0.98631	0.74719
0.53546	0.72403		0.5218	0.62013		0.82148	0.57449		0.62057	0.24264		0.14299	0.19546		1.0019	1.1223
0.53588	0.5283		0.51496	0.62001		0.88278	0.57472		0.6205	0.24273		0.10071	0.2168		1.0247	0.84873
0.53593	0.63964		0.5371	0.61973		0.89233	0.57481		0.6205	0.24285		0.14041	0.23317		0.97425	0.70164
0.53631	0.54331		0.48894	0.61968		0.827	0.57539		0.62016	0.24286		0.20176	0.20507		0.99646	0.77469
0.53652	0.72342		0.56588	0.61924		0.81168	0.5755		0.6201	0.24289		0.12578	0.17929		1.0215	0.77453
0.53661	0.58959		0.49728	0.61842		0.83694	0.57555		0.62008	0.2429		0.24796	0.21669		1.0103	0.79568
0.53668	0.51977		0.49544	0.61833		0.8509	0.57561		0.62005	0.24298		0.15959	0.22483		0.99767	0.74845
0.53671	0.55701		0.46038	0.61823		0.2286	0.57585		0.61984	0.24307		0.19133	0.23644		1.0059	0.75252
0.53676	0.58561		0.48128	0.6181		0.21387	0.57585		0.61983	0.24311		0.15483	0.19173		0.96536	0.92451
0.53696	0.60916		0.51509	0.61806		0.22262	0.57608		0.61983	0.24312		0.17602	0.19176		0.98971	0.86276
0.53711	0.60353		0.4946	0.6179		0.31828	0.57615		0.61961	0.24321		0.19687	0.18804		1.0071	0.822
0.53763	0.66556		0.50828	0.61773		0.25774	0.57633		0.61957	0.24325		0.18418	0.17679		0.99385	0.71048
0.53793	0.48271		0.59977	0.6177		0.27088	0.57635		0.61946	0.2433		0.19661	0.19605		0.97953	0.82883
0.53811	0.55215		0.51998	0.61766		0.28617	0.57635		0.61942	0.24335		0.21149	0.25776		0.98865	1.0811
0.53827	0.57152		0.48373	0.61735		0.2345	0.57658		0.61937	0.24353		0.20321	0.23682		0.98134	0.66353
0.53829	0.56817		0.48238	0.61728		0.20776	0.57658		0.61933	0.24359		0.15361	0.18974		0.99774	0.94434
0.53831	0.52653		0.5162	0.6172		0.30077	0.57665		0.61923	0.24366		0.14598	0.19627		0.99034	1.0458
0.53855	0.55072		0.46051	0.61705		0.27046	0.57672		0.61918	0.24371		0.21193	0.26261		0.98545	0.89026
0.53882	0.55952		0.49123	0.61689		0.23268	0.57697		0.61917	0.24375		0.16036	0.23722		1.0055	1.0365
0.53911	0.61837		0.53392	0.61665		0.32049	0.57743		0.61912	0.24378		0.15801	0.20039		0.99807	0.64927
0.53912	0.5642		0.56032	0.61665		0.34705	0.57753		0.61912	0.24379		0.1988	0.21849		0.99122	1.0199
0.53914	0.59576		0.51467	0.61579		0.17346	0.57768		0.61892	0.24383		0.22431	0.24809		0.99642	0.94252
0.53919	0.86299		0.53476	0.61559		0.3206	0.57782		0.61882	0.24387		0.27834	0.21358		1.0221	0.70974
0.53919	0.87305		0.41866	0.61526		0.2784	0.57812		0.61876	0.24391		0.21734	0.16236		1.0138	0.68449
0.53935	0.85714		0.53186	0.61491		0.19259	0.57812		0.61867	0.24393		0.15847	0.17321		0.96913	0.7498
0.53942	0.90086		0.63943	0.6147		0.19782	0.57844		0.61864	0.24396		0.15607	0.27143		0.98664	0.866
0.53943	0.9432		0.51617	0.61442		0.19366	0.57857		0.61862	0.24398		0.15808	0.23059		0.98956	0.96343
0.53947	0.9061		0.46863	0.6144		0.19674	0.57857		0.61839	0.24404		0.1229	0.19583		0.97588	1.0165
0.53959	0.54317		0.47791	0.61433		0.26849	0.57859		0.61839	0.24405		0.16902	0.2201		0.97972	0.79715
0.53998	0.55131		0.53219	0.61418		0.16004	0.5786		0.61828	0.24411		0.11313	0.21606		0.97875	0.64935
0.54028	0.52365		0.50002	0.61396		0.223	0.57907		0.61823	0.24418		0.14755	0.20984		0.97834	0.80154
0.54029	0.56249		0.50578	0.61391		0.24908	0.5791		0.61798	0.24423		0.2291	0.19242		0.98942	0.78824
0.54031	0.58076		0.53311	0.61388		0.3102	0.57925		0.61797	0.2443		0.16554	0.1984		0.97648	0.8093
0.5404	0.52893		0.49845	0.61368		0.23952	0.57969		0.61766	0.24439		0.22195	0.1973		0.9877	0.74883
0.54072	0.34406		0.51237	0.61363		0.26615	0.57974		0.61751	0.24452		0.17418	0.25764		0.99573	0.8614
0.54092	0.51576		0.53587	0.6128		0.32146	0.57981		0.61738	0.24462		0.14521	0.19484		0.98796	0.78481
0.54093	0.63175		0.43841	0.61277		0.28698	0.58016		0.61724	0.24466		0.15241	0.18235		0.99881	0.68775
0.54109	0.56415		0.56302	0.61176		0.36617	0.58035		0.61712	0.24471		0.13453	0.22452		1.0109	0.95968
0.54111	0.64114		0.47424	0.61159		0.80484	0.58055		0.61707	0.24479		0.19866	0.2215		1.0086	0.59635
0.54127	0.43448		0.5215	0.61149		0.21302	0.58064		0.61705	0.24489		0.18046	0.25428		0.98717	0.71736
0.54134	0.67341		0.47558	0.61127		0.30172	0.5808		0.61702	0.24489		0.17974	0.16613		1.0081	0.84031
0.54138	0.54868		0.57234	0.61114		0.35977	0.58102		0.61692	0.24491		0.17753	0.17873		1.0131	1.0602
0.54143	0.63337		0.57193	0.61063		0.26872	0.58111		0.61678	0.245		0.13285	0.18202		1.0307	0.91989
0.54149	0.66616		0.54037	0.61014		0.20842	0.58111		0.61667	0.24504		0.18084	0.19196		0.97552	0.57185
0.54152	0.28436		0.41165	0.6095		0.36967	0.58138		0.61656	0.24508		0.19446	0.20454		1.0032	0.99571
0.54169	0.65773		0.51151	0.60916		0.27246	0.5816		0.61656	0.24509		0.1427	0.1734		0.99709	0.78983
0.54179	0.56719		0.49256	0.60912		0.40357	0.58178		0.61648	0.24512		0.12916	0.24991		0.98541	0.82929
0.54193	0.58239		0.44449	0.6091		0.27702	0.58186		0.61629	0.24527		0.14393	0.2093		0.99898	0.67468
0.54195	0.62528		0.4824	0.60861		0.23276	0.58193		0.61626	0.24527		0.14376	0.26796		0.98178	0.8881
0.54209	0.72568		0.61353	0.60834		0.25654	0.58208		0.61624	0.24528		0.21498	0.27794		1.0274	0.9425
0.54244	0.6403		0.52542	0.60812		0.3002	0.58216		0.61615	0.24536		0.11891	0.15113		0.98802	0.80801
0.54252	0.61267		0.55637	0.60797		0.28064	0.58299		0.61612	0.24541		0.21709	0.17549		0.98057	0.94669
0.54256	0.66988		0.61272	0.60772		0.34765	0.58321		0.61601	0.24542		0.14996	0.16399		0.98889	0.83433
0.54261	0.53738		0.60388	0.6077		0.34353	0.58347		0.616	0.24544		0.12529	0.2043		1.0183	0.82547
0.54264	0.72221		0.54268	0.60741		0.33027	0.58361		0.61596	0.24549		0.15364	0.21113		1.0285	1.0621
0.54279	0.67485		0.55115	0.60734		0.43753	0.58364		0.61596	0.24552		0.1698	0.23011		1.0018	1.0733
0.54293	0.64214		0.59185	0.60713		0.28461	0.58365		0.61592	0.24552		0.1424	0.24616		0.99949	0.69755
0.54299	0.61446		0.56664	0.60684		0.36737	0.58399		0.61585	0.24552		0.20704	0.24122		1.0157	0.7482
0.54324	0.63833		0.47453	0.60634		0.31371	0.58469		0.61585	0.24555		0.21417	0.215		0.99031	0.86781
0.54334	0.56643		0.51071	0.60615		0.23688	0.58474		0.61577	0.24566		0.22903	0.23948		1.0225	0.72192
0.54362	0.60285		0.48218	0.60573		0.23255	0.58501		0.61554	0.24567		0.12651	0.203		1.0125	0.85296
0.54412	0.37888		0.48463	0.60565		0.27649	0.58527		0.61549	0.24573		0.17496	0.22077		0.99979	0.63131
0.54424	0.63917		0.52675	0.60556		0.31588	0.58534		0.61547	0.24577		0.2119	0.22315		1.0095	0.66203
0.54425	0.75223		0.42265	0.60513		0.27281	0.5858		0.61544	0.24577		0.76066	0.1831		1.0257	0.92365
0.5444	0.62108		0.52252	0.60495		0.28797	0.5858		0.61542	0.24581		0.76762	0.20545		0.97632	0.88853
0.54446	0.73771		0.54576	0.60482		0.28242	0.58653		0.61535	0.24591		0.76404	0.20673		0.93613	0.85564
0.54478	0.63295		0.53183	0.60476		0.26797	0.58666		0.61502	0.24604		0.79714	0.32544		1.0059	0.77952
0.54491	0.60558		0.47274	0.60347		0.22516	0.58679		0.61488	0.24608		0.82122	0.22385		1.0262	0.72853
0.54499	0.61489		0.50659	0.60309		0.17649	0.58702		0.61482	0.24609		0.81709	0.2328		0.96604	0.70648
0.54508	0.52674		0.52887	0.60266		0.25376	0.58729		0.61469	0.2461		0.80545	0.19163		0.98544	0.68764
0.54523	0.50463		0.49797	0.60239		0.21652	0.5874		0.61442	0.2461		0.7515	0.20532		1.013	1.0499
0.54555	0.5427		0.47534	0.60225		0.31544	0.58805		0.61442	0.24623		0.75767	0.23538		0.99587	0.75362
0.54565	0.56104		0.60616	0.6018		0.30991	0.58858		0.61434	0.24623		0.84691	0.2617		0.97968	0.78754
0.54585	0.47322		0.57469	0.60128		0.28774	0.58892		0.61409	0.24624		0.86434	0.217		0.97967	0.7081
0.54587	0.27475		0.59749	0.60086		0.29433	0.58897		0.61389	0.24652		0.77797	0.23853		1.0053	0.88082
0.54602	0.45536		0.53648	0.60085		0.22084	0.58897		0.61387	0.24653		0.70065	0.19936		0.98867	0.89311
0.54603	0.31458		0.57257	0.60072		0.35025	0.58911		0.61382	0.24653		0.75129	0.2336		0.9826	0.89416
0.54638	0.45357		0.70543	0.60034		0.22323	0.58925		0.6138	0.24657		0.69831	0.22109		1.0111	0.69188
0.54642	0.42842		0.54121	0.59971		0.27231	0.58966		0.61379	0.24659		0.77022	0.21346		0.99734	0.4621
0.54646	0.70403		0.54527	0.59956		0.18232	0.5898		0.61363	0.24665		0.71705	0.20856		1.0174	0.72636
0.54647	0.74812		0.55648	0.59915		0.30125	0.59009		0.61356	0.24672		0.74201	0.21665		1.0001	0.7441
0.54659	0.563		0.56443	0.59837		0.26935	0.59023		0.61347	0.24676		0.71542	0.25725		0.99567	0.93808
0.54667	0.65521		0.60937	0.59793		0.42791	0.59034		0.61344	0.24677		0.9033	0.18657		1.0202	0.76709
0.54672	0.63908		0.61683	0.59783		0.47042	0.59074		0.61342	0.24683		0.81387	0.1971		1.0091	0.81907
0.54681	0.61911		0.60161	0.59775		0.44704	0.59076		0.6134	0.24683		0.7716	0.18421		0.99891	0.85931
0.54689	0.66185		0.59723	0.59762		0.43163	0.59077		0.61333	0.24686		0.77309	0.22813		0.984	0.73095
0.54701	0.42091		0.55586	0.5976		0.37456	0.59079		0.6133	0.24695		0.79378	0.21083		0.99784	0.78119
0.54701	0.63541		0.60847	0.59689		0.54884	0.59109		0.61327	0.24697		0.82373	0.21771		0.99767	0.77988
0.54709	0.58735		0.49001	0.59687		0.40944	0.59111		0.61325	0.24698		0.84529	0.2661		0.99005	0.87809
0.5473	0.51947		0.63352	0.59671		0.45496	0.59117		0.61315	0.24699		0.54815	0.1515		1.023	0.98878
0.54748	0.47973		0.63085	0.59667		0.4015	0.59119		0.61306	0.24706		0.65042	0.19996		0.99654	0.9939
0.54753	0.43416		0.62182	0.59618		0.58814	0.59147		0.613	0.24712		0.80137	0.2694		0.98965	0.7221
0.54773	0.51591		0.55709	0.59614		0.39111	0.59185		0.61298	0.24725		0.81391	0.21771		0.99314	0.82135
0.54776	0.26023		0.64164	0.59609		0.3551	0.59215		0.61286	0.24726		0.77383	0.25845		1.0112	1.0314
0.54804	0.58408		0.55911	0.59553		0.26972	0.59222		0.6128	0.24727		0.83036	0.18637		1.0016	0.94854
0.54825	0.48031		0.54822	0.59548		0.34069	0.59223		0.61275	0.24746		0.87272	0.22483		0.98909	0.82157
0.54833	0.52319		0.62811	0.595		0.32648	0.59236		0.61272	0.24746		0.88034	0.25374		1.0035	0.99221
0.54839	0.46702		0.57187	0.59498		0.30241	0.59236		0.61264	0.24748		0.88733	0.19714		1.0126	0.87787
0.54852	0.55777		0.61842	0.59491		0.3085	0.59248		0.61263	0.24749		0.87512	0.26754		1.0126	0.80512
0.54859	0.51156		0.57714	0.59421		0.36026	0.59251		0.61229	0.24758		0.74496	0.17113		0.98398	0.7019
0.54864	0.6657		0.59869	0.59415		0.28909	0.59277		0.6122	0.24758		0.8013	0.22561		0.98838	0.82413
0.54903	0.53935		0.6056	0.59396		0.40192	0.59299		0.61218	0.24761		0.88778	0.20296		1.004	0.68267
0.54928	0.79991		0.59979	0.59342		0.41581	0.59318		0.61218	0.24764		0.81803	0.16387		0.97737	0.57716
0.54954	0.5522		0.49852	0.59337		0.43857	0.59339		0.61208	0.24765		0.88096	0.21505		1.0022	1.1862
0.54966	0.39625		0.49048	0.59318		0.42077	0.59357		0.61203	0.24768		0.81875	0.2657		0.99929	0.70514
0.54975	0.61451		0.5796	0.5929		0.41369	0.59377		0.61191	0.24774		0.85907	0.18884		0.98046	0.90465
0.54985	0.52948		0.64654	0.59278		0.37869	0.59379		0.6118	0.24784		0.84939	0.24391		0.98991	0.75424
0.55007	0.44582		0.51989	0.59261		0.49183	0.59394		0.61171	0.24795		0.85782	0.22532		0.99523	0.84138
0.55015	0.39913		0.54741	0.59093		0.40264	0.59404		0.61162	0.248		0.82184	0.22392		0.99313	0.64245
0.55018	0.22885		0.5314	0.59079		0.56388	0.59414		0.61161	0.24804		0.7947	0.25854		0.99827	0.89193
0.55026	0.61246		0.58837	0.59029		0.58338	0.59453		0.61151	0.2481		0.8204	0.22169		1.0238	0.57015
0.55028	0.61385		0.55024	0.59021		0.42439	0.59492		0.61137	0.24818		0.85932	0.23223		0.985	0.92462
0.55035	0.44052		0.51458	0.59009		0.42694	0.59493		0.61136	0.24818		0.84621	0.25351		0.97746	0.70601
0.55053	0.37153		0.57845	0.58954		0.42452	0.59563		0.61135	0.24826		0.88579	0.23958		0.97842	0.74641
0.55075	0.43274		0.52803	0.5892		0.383	0.59603		0.61135	0.24828		0.88636	0.22238		0.98673	0.68297
0.5513	0.52387		0.55831	0.58909		0.52764	0.59621		0.61135	0.24837		0.87993	0.23334		0.9844	0.77091
0.55157	0.43402		0.53532	0.5889		0.39888	0.59628		0.61134	0.24844		0.78342	0.1759		0.9932	0.78895
0.55163	0.35668		0.52985	0.58884		0.38036	0.59639		0.61133	0.24847		0.84813	0.29248		0.99539	0.99418
0.55183	0.60792		0.54242	0.58862		0.39969	0.59649		0.61119	0.24849		0.87044	0.19617		0.99133	0.83247
0.55282	0.55599		0.50877	0.58848		0.53899	0.59669		0.61108	0.24853		0.82882	0.21462		0.99468	0.6624
0.55286	0.45277		0.43912	0.58836		0.44012	0.59676		0.61103	0.24859		0.66939	0.21685		1.0125	0.95538
0.55295	0.33181		0.49746	0.58819		0.48907	0.59681		0.61102	0.24861		0.7816	0.28848		0.99003	0.67808
0.55301	0.54264		0.4612	0.58812		0.49345	0.59685		0.61099	0.24866		0.82216	0.1996		0.99228	0.82212
0.5531	0.4968		0.60365	0.58804		0.37157	0.59692		0.61088	0.24872		0.77246	0.27469		0.99466	0.87425
0.55338	0.47549		0.71178	0.58763		0.39505	0.59693		0.61086	0.24876		0.76154	0.13434		1.0077	0.66677
0.55346	0.44323		0.66312	0.58754		0.38538	0.59702		0.61086	0.24877		0.77618	0.10613		1.0153	0.82972
0.55373	0.52515		0.61492	0.58726		0.43921	0.59704		0.61065	0.24883		0.82281	0.13968		1.0084	0.87458
0.55383	0.55428		0.67588	0.58715		0.54076	0.59708		0.61048	0.24896		0.77553	0.14853		1.0182	0.92612
0.55389	0.29992		0.61412	0.5868		0.55815	0.59717		0.61046	0.24902		0.77909	0.1681		1.0039	0.79327
0.5541	0.6817		0.72198	0.58633		0.54464	0.59717		0.61034	0.2491		0.80294	0.17697		1.008	0.60812
0.55433	0.41919		0.66209	0.5862		0.31543	0.59733		0.61026	0.2491		0.71537	0.13514		1.009	1.2057
0.55455	0.22972		0.6164	0.58606		0.58118	0.59733		0.61023	0.2491		0.77925	0.09089		1.0049	0.83403
0.55457	0.22185		0.59147	0.58565		0.47199	0.59747		0.61021	0.24914		0.78048	0.13808		1.017	0.54552
0.55466	0.42992		0.61246	0.58536		0.80633	0.59748		0.61015	0.24917		0.78859	0.093429		0.99407	0.85262
0.55479	0.59351		0.64308	0.58488		0.59271	0.59757		0.61013	0.24919		0.69567	0.0961		0.98672	0.81188
0.55483	0.5109		0.6594	0.58468		0.48992	0.59782		0.60993	0.24921		0.79443	0.14894		1.002	0.77687
0.55491	0.31649		0.63518	0.58416		0.48527	0.59825		0.60976	0.24923		0.72149	0.13968		1.0288	0.82466
0.55573	0.31344		0.61658	0.58405		0.38766	0.59844		0.60974	0.24925		0.76805	0.096356		1.0099	0.61044
0.55607	0.45377		0.68533	0.58391		0.34404	0.59863		0.60962	0.24931		0.75317	0.10286		0.98969	0.7794
0.55616	1.0014		0.71808	0.58389		0.41778	0.59877		0.60962	0.24938		0.84832	0.098918		0.98582	0.80575
0.55619	0.93883		0.76742	0.58375		0.51911	0.5989		0.60955	0.24944		0.80338	0.094993		1.0008	1.0303
0.55625	0.48349		0.75072	0.58347		0.45457	0.59908		0.60943	0.24944		0.75328	0.12314		1.0081	0.76964
0.55658	0.47359		0.64714	0.58284		0.52291	0.59913		0.6094	0.2495		0.81183	0.10138		1.007	0.89169
0.55659	0.49845		0.74131	0.58237		0.47747	0.59925		0.60931	0.24958		0.75156	0.11262		1.0072	0.95194
0.55669	0.47396		0.7004	0.58218		0.39893	0.59934		0.60917	0.24966		0.78383	0.15042		0.98211	0.97493
0.55688	0.47543		0.66801	0.58159		0.51206	0.59982		0.60912	0.24969		0.76006	0.11475		0.97892	0.97459
0.55704	0.4016		0.71719	0.58127		0.43717	0.60038		0.60897	0.2497		0.77218	0.14519		1.0087	0.92923
0.55757	0.42245		0.69721	0.58126		0.48746	0.60043		0.6088	0.24972		0.77252	0.18612		0.9952	0.96288
0.55781	0.74553		0.72226	0.58034		0.42439	0.60054		0.6087	0.24973		0.79546	0.076404		1.0045	0.99379
0.55814	0.45643		0.66155	0.58032		0.43361	0.60063		0.60848	0.24974		0.77857	0.13774		1.0057	0.95216
0.55822	0.49906		0.64051	0.5802		0.51113	0.60063		0.60843	0.24978		0.75219	0.14732		0.98806	0.92861
0.55828	0.52304		0.73837	0.5801		0.48645	0.60109		0.60836	0.2498		0.77973	0.14435		1.0021	0.98169
0.55893	0.52404		0.69318	0.58005		0.28273	0.60114		0.60832	0.24981		0.84572	0.065044		1.0245	0.95311
0.55896	0.52482		0.66035	0.57957		0.40456	0.60141		0.60818	0.24981		0.88043	0.1087		1.0197	0.99236
0.55912	0.51553			0.57916		0.36697	0.60183		0.60803	0.24986		0.81063	0.14363		1.0158	0.97058
0.55934	0.55333			0.57915		0.42405	0.60203		0.60794	0.24987		0.81134	0.088233		1.0077	0.99074
0.5596	0.40859			0.57914		0.23846	0.60257		0.60784	0.24989		0.84665	0.1451		1.0076	0.99123
0.55972	0.62007			0.57906		0.25803	0.60277		0.60777	0.24998		0.86672	0.12618		1.0073	0.99089
0.55976	0.54557			0.57897		0.27923	0.60282		0.60773	0.25004		0.83177	0.095489		0.97723	0.96528
0.55988	0.55584			0.57867		0.22891	0.60294		0.60772	0.25021		0.81037	0.13385		0.95703	1.0045
0.5601	0.58697			0.57856		0.34648	0.60321		0.60769	0.25025		0.85665	0.20576		1.0202	0.93795
0.5602	0.57121			0.57821		0.35788	0.60324		0.60766	0.25028		0.85398	0.18021		0.98997	0.97708
0.56038	0.46753			0.5782		0.34376	0.60331		0.60761	0.2504		0.82917	0.15647		1.0081	0.98488
0.5608	0.55395			0.57799		0.2895	0.60343		0.60761	0.25049		0.83604	0.12795		0.99171	0.96118
0.56083	0.55191			0.57796		0.3734	0.60373		0.60757	0.25052		0.79708	0.13022		0.9864	0.97785
0.56102	0.49203			0.57786		0.49099	0.60417		0.60754	0.25052		0.79564	0.22321		1.0021	0.98255
0.56127	0.41895			0.57777		0.31775	0.60446		0.6075	0.25063		0.61269	0.15778		0.96172	0.94442
0.56152	0.4397			0.57772		0.41661	0.60463		0.60748	0.25063		0.78213	0.22162		1.0068	0.94028
0.56167	0.46998			0.57737		0.41066	0.60465		0.60739	0.25066		0.78274	0.21012		0.98211	0.98561
0.56177	0.48945			0.57714		0.3866	0.60475		0.60737	0.25073		0.77998	0.23398		1.0055	0.96313
0.56188	0.62201			0.5766		0.36773	0.60479		0.60725	0.25074		0.75947	0.20719		0.9945	0.99179
0.56194	0.40093			0.57651		0.5436	0.60482		0.60721	0.25076		0.85527	0.20798		0.99313	0.92373
0.56222	0.61337			0.5765		0.35991	0.60497		0.60714	0.25077		0.77595	0.14274		0.99996	0.9674
0.56263	0.48649			0.57648		0.34105	0.60509		0.6071	0.25082		0.68388	0.20419		0.96763	1.0014
0.56295	0.61346			0.57606		0.33258	0.60515		0.60702	0.25087		0.70634	0.20411		0.9976	0.98737
0.56298	0.48203			0.57598		0.39367	0.60542		0.60702	0.25092		0.76518	0.16639		0.99785	0.97595
0.56301	0.51571			0.57577		0.36126	0.60549		0.60699	0.25099		0.76315	0.16785		0.98356	0.97432
0.56333	0.48715			0.57496		0.36194	0.60555		0.60686	0.25112		0.74925	0.17823		0.9987	0.99509
0.56338	0.5081			0.57483		0.3751	0.6057		0.6068	0.25114		0.72738	0.12812		0.98963	0.99224
0.56341	0.4319			0.5748		0.3863	0.60585		0.60678	0.25115		0.72207	0.11472		0.99695	0.96786
0.56348	0.53503			0.57468		0.3153	0.60602		0.60677	0.25116		0.76321	0.16725		1.0075	0.97655
0.56367	0.64658			0.57449		0.27496	0.6066		0.60671	0.25121		0.80423	0.23108		1.0244	0.96468
0.56376	0.56112			0.57419		0.35806	0.60673		0.60667	0.25131		0.70014	0.22553		1.0035	0.95549
0.56384	0.4903			0.57395		0.3795	0.6069		0.60648	0.25131		0.72362	0.21383		0.99069	0.97065
0.56417	0.41154			0.57382		0.34503	0.60698		0.60637	0.25145		0.84016	0.166		0.99097	0.97728
0.5644	0.46483			0.57345		0.32378	0.60699		0.60624	0.25175		0.7487	0.24214		0.97196	0.97882
0.56442	0.64472			0.57266		0.31482	0.60715		0.60621	0.25179		0.71131	0.23995		1.0079	0.93173
0.56442	0.5558			0.57258		0.27267	0.60774		0.60614	0.25179		0.66718	0.1026		0.98743	0.97084
0.56448	0.39931			0.57125		0.3654	0.6078		0.60611	0.25187		0.71129	0.1151		0.97182	0.99454
0.56462	0.39965			0.57124		0.33329	0.60786		0.60605	0.25198		0.71707	0.10917		1.0005	0.97569
0.56496	0.62396			0.57079		0.31065	0.60808		0.60604	0.252		0.75976	0.19068		0.99612	1.0051
0.56508	0.70068			0.57047		0.32121	0.60815		0.60602	0.25202		0.71962	0.2216		0.97312	0.98171
0.56517	0.59779			0.57043		0.37472	0.60816		0.60597	0.25205		0.66689	0.2647		1.016	0.99442
0.56528	0.70724			0.57034		0.4381	0.60825		0.60595	0.25208		0.67004	0.26175		0.99407	0.95658
0.56532	0.55775			0.56992		0.60134	0.6084		0.6059	0.25212		0.706	0.18151		1.0032	0.98833
0.56539	0.49717			0.56957		0.38244	0.60881		0.60572	0.25213		0.71112	0.18351		1.0297	0.94615
0.56539	0.37201			0.56929		0.54926	0.60904		0.60562	0.25213		0.75126	0.26662		1.0039	0.94078
0.56543	0.33633			0.56905		0.51709	0.60935		0.60558	0.25223		0.72907	0.32344		1.0015	0.96166
0.56585	0.33523			0.56897		0.54118	0.60941		0.60542	0.25231		0.74955	0.18204		0.99763	0.98803
0.56589	0.47034			0.56896		0.43957	0.60971		0.60541	0.25251		0.65043	0.23415		0.98954	0.98559
0.56639	0.38867			0.56885		0.46225	0.60984		0.60533	0.25254		0.7633	0.1997		0.97839	0.96151
0.5666	0.42165			0.56799		0.46859	0.61004		0.60533	0.25262		0.78202	0.21436		0.98992	0.97857
0.56667	0.40209			0.56755		0.63184	0.61008		0.60513	0.25263		0.78849	0.26143		0.95553	0.97612
0.56672	0.59985			0.5674		0.60198	0.61024		0.6051	0.25267		0.7057	0.24318		1.0046	0.96902
0.56673	0.62389			0.56713		0.50739	0.61057		0.60501	0.25268		0.72743	0.22137		1.0064	0.95684
0.56694	0.54504			0.56688		0.47922	0.61057		0.60496	0.25269		0.55959	0.22939		1.0259	1.0107
0.56709	0.40347			0.56678		0.47697	0.61064		0.60495	0.25269		0.48574	0.22739		0.9941	0.99295
0.56717	0.56975			0.56678		0.48734	0.61067		0.60495	0.25271		0.58264	0.19037		0.99385	1.0225
0.5675	0.57978			0.56671		0.47096	0.61069		0.60493	0.25274		0.54852	0.19596		1.0074	0.98126
0.5675	0.62954			0.56656		0.47653	0.61074		0.60493	0.25286		0.50502	0.21448		0.99373	0.97326
0.56764	0.63468			0.56648		0.49558	0.6114		0.6049	0.2529		0.55452	0.13098		0.98315	0.99478
0.56787	0.53649			0.56598		0.56641	0.61141		0.60488	0.25309		0.56889	0.25868		0.96821	0.97543
0.56813	0.54777			0.56597		0.51748	0.61144		0.60487	0.25312		0.49051	0.2359		0.98858	0.98279
0.56833	0.48784			0.56596		0.59799	0.61155		0.60481	0.25317		0.50561	0.19991		0.99323	0.95806
0.5687	0.48389			0.56595		0.57508	0.6119		0.6046	0.2532		0.62265	0.15822		1.0038	0.97469
0.56905	0.60171			0.56567		0.49706	0.61212		0.60455	0.25328		0.37301	0.22147		0.99505	0.99819
0.56916	0.64645			0.56552		0.50223	0.61227		0.60434	0.25329		0.37532	0.1945		0.99825	0.96355
0.56938	0.47701			0.56547		0.44068	0.61241		0.60428	0.25332		0.30455	0.24768		1.0098	0.97413
0.5694	0.53026			0.56525		0.54682	0.61266		0.60422	0.25352		0.36585	0.1238		1.0094	0.9915
0.57001	0.5428			0.56476		0.4459	0.61281		0.60414	0.25362		0.37066	0.249		0.97656	0.99373
0.57011	0.53419			0.56467		0.42523	0.61293		0.60388	0.25372		0.2487	0.25002		0.97383	0.98801
0.57015	0.43879			0.56449		0.54521	0.613		0.60383	0.25376		0.34958	0.26803		0.98684	0.96465
0.57027	0.41679			0.5641		0.55583	0.61301		0.60367	0.25384		0.37107	0.22845		0.99546	0.96322
0.57035	0.62636			0.56408		0.49398	0.61315		0.60366	0.25407		0.32096	0.2328		0.98528	0.99861
0.57038	0.53671			0.56407		0.59401	0.61337		0.60364	0.25409		0.39341	0.26774		1.0048	1.0074
0.57044	0.42423			0.56366		0.50657	0.6134		0.60361	0.25413		0.44236	0.2936		1.0071	0.97413
0.57094	0.54013			0.56346		0.4192	0.61346		0.60358	0.2542		0.37793	0.26601		0.99521	0.98941
0.57098	0.61747			0.56316		0.62236	0.61383		0.60327	0.25423		0.29015	0.29772		0.37617	0.95445
0.57134	0.4804			0.56304		0.53918	0.61401		0.60318	0.25432		0.3345	0.36554		0.42743	0.98733
0.57214	0.39856			0.56202		0.57665	0.61411		0.60311	0.25455		0.34746	0.27358		0.48796	0.9815
0.57254	0.4671			0.5618		0.58728	0.61462		0.60291	0.25462		0.35903	0.43876		0.29112	0.95553
0.57276	0.32272			0.56141		0.71978	0.61466		0.6028	0.2548		0.36472	0.43657		0.37576	1.0027
0.57327	0.57334			0.56133		0.6743	0.6148		0.60276	0.25482		0.41765	0.49833		0.32751	0.95769
0.57335	0.44433			0.56121		0.52969	0.6149		0.6027	0.25483		0.29252	0.67017		0.47645	0.97116
0.57346	0.24865			0.56091		0.64576	0.61522		0.6026	0.25484		0.21273	0.35315		0.319	0.9882
0.57347	0.52652			0.56007		0.69703	0.61538		0.60238	0.25485		0.33865	0.33141		0.39299	1.0186
0.57354	0.40618			0.55974		0.61979	0.61561		0.60237	0.25485		0.58893	0.29014		0.53959	0.96994
0.57375	0.46244			0.55933		0.57922	0.61565		0.60217	0.25485		0.55919	0.34872		0.33488	0.98041
0.57395	0.21364			0.55931		0.67387	0.6161		0.6021	0.25492		0.53643	0.3739		0.18162	0.97881
0.57405	0.29008			0.55895		0.49663	0.61614		0.602	0.25495		0.25624	0.36691		0.11186	0.9872
0.57422	0.46989			0.55892		0.6491	0.61637		0.60193	0.25498		0.52178	0.3167		0.37528	0.96362
0.5744	0.53644			0.55891		0.55009	0.61647		0.60191	0.25499		0.75424	0.36201		0.29358	1.0016
0.57449	0.67181			0.55873		0.58517	0.61652		0.60186	0.25503		0.79405	0.29765		0.42884	0.93437
0.57478	0.4689			0.55863		0.45036	0.61666		0.60184	0.25507		0.35777	0.26361		0.33511	0.99294
0.57497	0.49972			0.55785		0.64041	0.61726		0.60182	0.25514		0.54414	0.37357		0.38885	0.97428
0.57552	0.47923			0.55767		0.60646	0.61748		0.60174	0.25514		0.67334	0.40489		0.35969	0.98978
0.5757	0.62029			0.55734		0.56232	0.61749		0.60171	0.25531		0.37498	0.4891		0.40139	0.99493
0.57571	0.48174			0.55723		0.53654	0.61758		0.60164	0.25544		0.2613	0.45224		0.57169	0.98165
0.57583	0.42821			0.5572		0.49076	0.61761		0.60159	0.25551		0.279	0.26062		0.4305	0.98674
0.57584	0.65572			0.55706		0.49152	0.61775		0.60158	0.25575		0.19765	0.30533		0.44373	0.96019
0.57596	0.51767			0.55699		0.62151	0.61779		0.6014	0.25578		0.15795	0.29104		0.31222	0.95495
0.57606	0.57889			0.55683		0.58664	0.61798		0.60138	0.25588		0.18349	0.21333		0.35566	0.97876
0.57616	0.51815			0.55647		0.54223	0.61816		0.60131	0.25594		0.6963	0.33559		0.616	0.98698
0.57626	0.43453			0.55621		0.51676	0.61831		0.60118	0.25601		0.8032	0.33905		0.48153	0.95735
0.57633	0.44901			0.55559		0.5177	0.61859		0.60109	0.25618		0.76102	0.32639		0.48122	0.99193
0.57661	0.50968			0.55554		0.61841	0.61882		0.60106	0.25619		0.7671	0.48476		0.22728	0.926
0.57666	0.51899			0.55542		0.48077	0.61885		0.60105	0.25628		0.72279	0.49326		0.54596	0.97251
0.57685	0.54465			0.5554		0.59581	0.61887		0.60102	0.25637		0.79045	0.33919		0.56979	0.9581
0.57685	0.41067			0.55527		0.56231	0.61889		0.60088	0.25638		0.7727	0.35268		0.55753	0.98209
0.57696	0.38085			0.55463		0.54945	0.61897		0.60085	0.25639		0.89025	0.46426		0.49486	0.98914
0.57712	0.60686			0.55402		0.64477	0.61912		0.60084	0.25647		0.76408	0.46328		0.51693	0.98046
0.57716	0.49349			0.55368		0.489	0.61917		0.60075	0.25655		0.76186	0.50044		0.35381	1.0174
0.57717	0.6329			0.55354		0.54922	0.61953		0.60072	0.25656		0.79928	0.39083		0.43307	0.9966
0.57719	0.46038			0.55321		0.45535	0.61954		0.60071	0.25656		0.7457	0.62533		0.29681	0.9399
0.5772	0.19877			0.55221		0.57356	0.61962		0.60069	0.25657		0.81614	0.42374		0.38198	0.94656
0.57806	0.40756			0.55206		0.34843	0.61976		0.60062	0.25665		0.76642	0.26626		0.42818	0.92433
0.57807	0.57519			0.55205		0.38293	0.62		0.6006	0.25666		0.70096	0.36837		0.40696	1.0072
0.57818	0.42894			0.55181		0.37895	0.62001		0.60028	0.25667		0.83112	0.33912		0.38096	0.96909
0.57818	0.21508			0.55171		0.38058	0.62046		0.60002	0.25671		0.86932	0.26887		0.34734	0.9827
0.57823	0.016587			0.5516		0.32053	0.6205		0.5999	0.25671		0.7977	0.3808		0.33592	1.0159
0.57825	0.066199			0.55138		0.30933	0.62061		0.59984	0.25676		0.83242	0.56036		0.63734	0.97375
0.57835	0.41734			0.55111		0.33459	0.62087		0.59965	0.25706		0.63667	0.64922		0.46644	0.9357
0.57842	0.33295			0.55106		0.27354	0.62132		0.59962	0.25723		0.3189	0.65703		0.41272	0.96397
0.57846	0.48767			0.55097		0.41133	0.62138		0.59961	0.25729		0.2863	0.24428		0.48154	0.95087
0.57866	0.41722			0.55073		0.41734	0.62154		0.59959	0.2573		0.33596	0.25702		0.7145	0.91913
0.57903	0.48519			0.55059		0.30646	0.62159		0.59944	0.2573		0.28069	0.37685		0.4888	0.98453
[truncated: 9,846 more rows]
