# Supplementary material for: Fuzzy supertertiary interactions within PSD-95 enable ligand binding
Source: eLife journal article supplement (doi:10.7554/elife.77242), 2022-09-07
Supplement: supp [file Raw data for Figure 4A.xlsx]

## Sheet: Sheet1
pointwise FRET efficiencies (Figure2A)
	PSD78 (P3-S2)		PSD78G		PSD94 (P1-G3)		PSD94G
	0.31775		0.43429		0.57158		0.050113
	0.3645		0.35558		0.53581		0.052698
	0.51226		0.29862		0.49761		0.052729
	0.3889		0.21146		0.40914		0.053656
	0.46833		0.24137		0.42567		0.054952
	0.47312		0.30637		0.33316		0.055973
	0.44611		0.49759		0.38618		0.057334
	0.41601		0.33967		0.40364		0.066203
	0.42327		0.27638		0.43041		0.06991
	0.49341		0.37058		0.46077		0.077507
	0.4792		0.21671		0.48215		0.078283
	0.51524		0.14494		0.33653		0.080701
	0.46101		0.2613		0.46593		0.083112
	0.44837		0.15919		0.19784		0.090706
	0.55415		0.1344		0.59478		0.091257
	0.53294		0.12332		0.67918		0.091615
	0.5845		0.21291		0.62029		0.092129
	0.50255		0.18511		0.41819		0.092558
	0.53558		0.24143		0.37845		0.097883
	0.4979		0.19204		0.41775		0.10425
	0.54624		0.19152		0.58582		0.10857
	0.40159		0.2825		0.39038		0.11057
	0.57889		0.15635		0.41381		0.11483
	0.76593		0.2259		0.49115		0.11707
	0.78623		0.39342		0.26891		0.11775
	0.90036		0.34051		0.35231		0.12284
	0.76768		0.34887		0.30505		0.12313
	0.8512		0.3088		0.34297		0.1271
	0.82038		0.4252		0.45575		0.12758
	0.80646		0.51206		0.44321		0.12947
	0.85415		0.34385		0.52795		0.13327
	0.82594		0.45614		0.3774		0.13446
	0.83513		0.37083		0.22425		0.13507
	0.88292		0.29769		0.42673		0.13524
	0.7813		0.20754		0.45957		0.13864
	0.89817		0.10295		0.43029		0.13925
	0.8088		0.44188		0.36278		0.14055
	0.76461		0.48285		0.36802		0.14099
	0.83699		0.50624		0.34678		0.14151
	0.75367		0.45286		0.18968		0.14351
	0.84291		0.40324		0.35417		0.14362
	0.81275		0.56276		0.35466		0.14478
	0.85674		0.39703		0.33828		0.14864
	0.85684		0.4661		0.37275		0.1496
	0.80706		0.27384		0.2722		0.1501
	0.82884		0.16311		0.37922		0.15213
	0.89913		0.26607		0.45985		0.15329
	0.84033		0.41421		0.29522		0.15356
	0.8117		0.62425		0.44975		0.15454
	0.75946		0.53316		0.19752		0.15625
	0.83961		0.59128		0.27345		0.15745
	0.83012		0.67691		0.31241		0.16024
	0.7657		0.57978		0.4273		0.16109
	0.81175		0.62598		0.23976		0.16128
	0.81484		0.52301		0.28563		0.1627
	0.81422		0.42693		0.39413		0.16518
	0.82687		0.39187		0.31765		0.16549
	0.88667		0.35234		0.34577		0.16596
	0.8354		0.4382		0.43772		0.16633
	0.84536		0.46946		0.36573		0.16657
	0.79996		0.61973		0.43155		0.16698
	0.84933		0.3889		0.43408		0.16773
	0.79743		0.51455		0.45928		0.16812
	0.80665		0.43995		0.39663		0.16816
	0.83626		0.40963		0.37815		0.16958
	0.6722		0.43916		0.32885		0.17052
	0.83767		0.45463		0.33908		0.17352
	0.78785		0.43965		0.35575		0.17418
	0.83301		0.5341		0.38508		0.17434
	0.84735		0.32718		0.24737		0.17489
	0.83351		0.48114		0.38607		0.17539
	0.78113		0.41673		0.29638		0.17546
	0.79252		0.52016		0.30756		0.17566
	0.85757		0.44935		0.33377		0.17711
	0.78093		0.40333		0.35341		0.17808
	0.85804		0.35284		0.25455		0.17854
	0.82372		0.34932		0.27471		0.17874
	0.86505		0.35707		0.29582		0.17921
	0.8499		0.38248		0.35992		0.17941
	0.86185		0.30125		0.27388		0.18072
	0.74672		0.43509		0.32349		0.18109
	0.75011		0.3346		0.37574		0.18145
	0.79924		0.27336		0.31646		0.18242
	0.7755		0.3134		0.28722		0.18275
	0.81247		0.44421		0.32244		0.18294
	0.85514		0.4081		0.39354		0.18305
	0.73326		0.3815		0.2776		0.1837
	0.76349		0.29879		0.30679		0.1839
	0.82737		0.4148		0.21834		0.18551
	0.72437		0.49653		0.33431		0.18653
	0.76977		0.44582		0.24837		0.18701
	0.79389		0.57058		0.30733		0.18838
	0.81293		0.4437		0.23896		0.18866
	0.82947		0.61265		0.18679		0.18877
	0.77141		0.5914		0.29286		0.1896
	0.81136		0.52473		0.23852		0.1897
	0.77188		0.51023		0.24248		0.18987
	0.74468		0.44397		0.26675		0.19166
	0.82588		0.59428		0.26864		0.19193
	0.77629		0.45877		0.29584		0.19205
	0.80986		0.30164		0.37108		0.19235
	0.83147		0.45377		0.18779		0.19272
	0.75751		0.55639		0.31974		0.19298
	0.77784		0.42327		0.32738		0.19382
	0.79701		0.53181		0.35201		0.19408
	0.90141		0.43703		0.2409		0.1942
	0.753		0.47925		0.21239		0.19592
	0.85114		0.40563		0.26727		0.19594
	0.69873		0.42064		0.42944		0.19611
	0.73291		0.39599		0.42469		0.19724
	0.83718		0.25838		0.24885		0.19928
	0.76034		0.36825		0.32209		0.19961
	0.8289		0.43217		0.24637		0.19967
	0.77316		0.55053		0.33738		0.20062
	0.77842		0.7448		0.32658		0.20108
	0.82581		0.78818		0.27288		0.20178
	0.70133		0.8032		0.27701		0.20207
	0.78427		0.84025		0.26717		0.20268
	0.79324		0.57378		0.26446		0.20324
	0.69981		0.70695		0.32369		0.20456
	0.72886		0.7286		0.27796		0.20458
	0.8406		0.85257		0.19796		0.20576
	0.79643		0.73674		0.34508		0.20591
	0.67367		0.7227		0.51087		0.20768
	0.82936		0.65588		0.51045		0.20775
	0.80277		0.83118		0.34231		0.20879
	0.77748		0.80902		0.31986		0.2099
	0.79315		0.8586		0.34649		0.21048
	0.82709		0.78435		0.33662		0.21087
	0.74209		0.64345		0.29563		0.2109
	0.74816		0.66405		0.3689		0.21127
	0.70724		0.77853		0.30425		0.21157
	0.80467		0.8178		0.26068		0.212
	0.76517		0.7672		0.20157		0.2123
	0.72489		0.75543		0.31309		0.21307
	0.76081		0.59307		0.19256		0.21316
	0.78879		0.80806		0.20473		0.21372
	0.76256		0.71078		0.20642		0.21395
	0.81172		0.75772		0.26639		0.21479
	0.79422		0.91288		0.18507		0.21519
	0.89119		0.76266		0.28624		0.21636
	0.77005		0.74014		0.23165		0.2171
	0.78108		0.67537		0.37967		0.21747
	0.76566		0.61147		0.22285		0.21759
	0.73235		0.78415		0.2117		0.21796
	0.78176		0.73993		0.17071		0.21849
	0.84518		0.86368		0.20668		0.21854
	0.79646		0.68991		0.21245		0.21874
	0.73779		0.68965		0.35385		0.21899
	0.72788		0.88292		0.46319		0.21961
	0.7505		0.624		0.12448		0.21999
	0.77208		0.68477		0.25261		0.22179
	0.7834		0.77619		0.17923		0.22183
	0.7353		0.69456		0.43293		0.22199
	0.77882		0.71885		0.23646		0.22205
	0.69959		0.61143		0.43463		0.22268
	0.77013		0.33635		0.28213		0.22272
	0.79539		0.6367		0.28077		0.22412
	0.75775		0.61375		0.28108		0.22513
	0.75939		0.78267		0.27883		0.22733
	0.8445		0.76279		0.29272		0.22845
	0.82829		0.80436		0.24559		0.22849
	0.80258		0.69065		0.22602		0.22857
	0.84105		0.63945		0.19743		0.229
	0.81335		0.62109		0.17293		0.22929
	0.7446		0.80904		0.26777		0.23087
	0.7847		0.76469		0.2932		0.23121
	0.76207		0.90883		0.28705		0.23138
	0.77231		0.77019		0.2166		0.23146
	0.68393		0.57477		0.23388		0.23203
	0.79845		0.5921		0.3147		0.23209
	0.83742		0.45127		0.42916		0.23213
	0.69995		0.49405		0.30427		0.23239
	0.60846		0.65422		0.34806		0.23273
	0.68857		0.57768		0.29868		0.23294
	0.49917		0.56961		0.32999		0.23316
	0.50717		0.44543		0.36679		0.23326
	0.60654		0.34194		0.25891		0.23333
	0.60144		0.52535		0.27523		0.23334
	0.63813		0.54409		0.26905		0.2336
	0.57335		0.45175		0.23522		0.23429
	0.67924		0.49408		0.23692		0.23449
	0.74296		0.61121		0.21064		0.23475
	0.58519		0.56697		0.2083		0.23525
	0.51074		0.5341		0.31593		0.23609
	0.64828		0.50488		0.26882		0.2366
	0.76401		0.50335		0.27756		0.23664
	0.74283		0.55543		0.2501		0.23734
	0.8066		0.54131		0.22319		0.23773
	0.83347		0.60323		0.24741		0.23838
	0.67211		0.49713		0.20131		0.23849
	0.8436		0.51812		0.41805		0.23889
	0.75698		0.4905		0.30537		0.23894
	0.65944		0.65282		0.2279		0.23976
	0.79603		0.49324		0.2399		0.23982
	0.79904		0.68189		0.20797		0.23988
	0.76564		0.64625		0.2689		0.23988
	0.75175		0.53565		0.1663		0.24076
	0.80543		0.61164		0.19172		0.24227
	0.71433		0.4953		0.20796		0.24232
	0.76569		0.49183		0.24319		0.24298
	0.69993		0.50568		0.30346		0.243
	0.7555		0.57672		0.27544		0.24365
	0.78658		0.61434		0.32547		0.24376
	0.72002		0.48901		0.23636		0.2438
	0.77612		0.57838		0.31563		0.24459
	0.76285		0.50454		0.31485		0.24467
	0.76084		0.48109		0.24426		0.24475
	0.80219		0.57134		0.38063		0.24534
	0.69103		0.67746		0.24417		0.24543
	0.70142		0.46471		0.21728		0.2468
	0.7521		0.5112		0.30684		0.24707
	0.78306		0.5688		0.3341		0.24755
	0.7065		0.52466		0.27779		0.24756
	0.83781		0.5182		0.25112		0.2483
	0.72506		0.5147		0.336		0.24831
	0.75694		0.55782		0.3138		0.24879
	0.77993		0.77154		0.32329		0.24882
	0.76604		0.87557		0.3182		0.24933
	0.82423		0.82888		0.26465		0.2494
	0.73512		0.84946		0.32203		0.2494
	0.78612		0.90678		0.36341		0.24945
	0.80752		0.7882		0.24755		0.24969
	0.76658		0.87647		0.21391		0.25028
	0.79543		0.82982		0.27611		0.25062
	0.74377		0.87888		0.32981		0.25082
	0.78564		0.6165		0.25885		0.25091
	0.83788		0.91051		0.30981		0.25107
	0.82529		0.84955		0.31995		0.25158
	0.74986		0.93855		0.28835		0.25203
	0.79785		0.90934		0.34519		0.25321
	0.80946		0.88964		0.25332		0.25362
	0.82781		0.78978		0.2836		0.25385
	0.82241		0.93316		0.3294		0.25414
	0.81594		0.9214		0.27963		0.25485
	0.72097		0.91549		0.37748		0.25499
	0.78711		0.95387		0.2418		0.25577
	0.72238		0.846		0.35837		0.25604
	0.79323		0.91451		0.26173		0.25608
	0.83433		0.84608		0.28855		0.25612
	0.80597		0.77476		0.33342		0.25634
	0.81044		0.92137		0.35133		0.2572
	0.80302		0.84246		0.38089		0.25772
	0.83937		0.94792		0.33166		0.25772
	0.71465		0.8323		0.35103		0.25877
	0.80781		0.84778		0.32047		0.25914
	0.78467		0.92547		0.20563		0.25939
	0.75307		0.97411		0.34869		0.25941
	0.7525		0.9098		0.29551		0.26049
	0.90312		0.95855		0.24209		0.26111
	0.81286		0.94043		0.33527		0.26167
	0.7216		0.93757		0.33958		0.26172
	0.77693		0.85146		0.38642		0.262
	0.75995		0.88273		0.32721		0.26211
	0.80702		0.8812		0.28675		0.26215
	0.80674		0.85151		0.36925		0.26217
	0.75453		0.84407		0.3178		0.26232
	0.68848		0.78996		0.51966		0.26244
	0.86226		0.85293		0.39451		0.26277
	0.81574		0.80048		0.46518		0.26289
	0.83427		0.8309		0.46494		0.26297
	0.70015		0.92437		0.53909		0.26376
	0.81568		0.97338		0.46782		0.26409
	0.72108		0.8601		0.35191		0.26414
	0.75797		0.89366		0.4809		0.26526
	0.67904		0.84762		0.4831		0.26529
	0.77526		0.91668		0.41406		0.26544
	0.82794		0.84748		0.48458		0.266
	0.85192		0.91468		0.42915		0.2661
	0.87125		0.90372		0.40671		0.26647
	0.86333		0.93191		0.47132		0.26715
	0.82803		0.95383		0.50072		0.26741
	0.80407		0.91989		0.51904		0.26791
	0.82345		0.9539		0.41829		0.26844
	0.70759		0.85101		0.42055		0.26887
	0.81096		0.89771		0.50184		0.26937
	0.84632		0.86668		0.49349		0.26938
	0.77724		0.87114		0.53414		0.26964
	0.81948		0.90216		0.34251		0.27079
	0.95894		0.8789		0.41249		0.27156
	0.83474		0.92611		0.5066		0.27162
	0.92656		0.91631		0.45165		0.27184
	0.79047		0.54183		0.35721		0.27186
	0.9064		0.90534		0.46757		0.27194
	0.80948		0.89866		0.41927		0.27269
	0.87332		0.86334		0.43754		0.27281
	0.76213		0.87717		0.39475		0.27337
	0.83989		0.94174		0.51007		0.27378
	0.79918		0.90995		0.44091		0.27402
	0.86578		0.96443		0.46853		0.27456
	0.91091		0.96866		0.42699		0.27475
	0.78722		0.89888		0.51894		0.27525
	0.90659		0.92649		0.4437		0.27527
	0.90598		0.806		0.38886		0.27528
	0.88356		0.9548		0.47532		0.27559
	0.8598		0.8859		0.41762		0.27579
	0.89901		1.0016		0.47459		0.27604
	0.84209		0.90926		0.45976		0.27779
	0.80147		0.88593		0.41723		0.27856
	0.90018		0.74406		0.38385		0.27898
	0.83695		0.9093		0.4443		0.27949
	0.8786		0.89181		0.4814		0.27996
	0.89055		0.96319		0.39434		0.27997
	0.82852		0.86815		0.46482		0.28002
	0.87615		0.89635		0.53598		0.28055
	0.89975		0.85588		0.51204		0.28073
	0.85188		0.83597		0.48304		0.28076
	0.84076		0.87028		0.40713		0.2811
	0.86628		0.98443		0.48833		0.28144
	0.81074		0.90365		0.60157		0.28184
	0.80633		0.81085		0.41909		0.28191
	0.96016		0.91442		0.46808		0.28237
	0.83829		0.87178		0.37439		0.28237
	0.90741		0.86478		0.41029		0.28245
	0.79513		0.85587		0.39818		0.28252
	0.86564		0.71021		0.48879		0.28281
	0.90612		0.89043		0.47536		0.2829
	0.88127		0.82553		0.37655		0.28306
	0.78914		0.80696		0.40605		0.2835
	0.74528		0.82854		0.48176		0.28384
	0.74245		0.91887		0.48478		0.2847
	0.7944		0.82621		0.37505		0.28497
	0.78821		0.84418		0.46341		0.2851
	0.82307		0.85291		0.48507		0.28571
	0.83708		0.79183		0.3485		0.28589
	0.81609		0.80835		0.47853		0.28597
	0.84547		0.82578		0.41449		0.28735
	0.84525		0.776		0.45169		0.28779
	0.7817		0.84869		0.40566		0.28784
	0.73436		0.91313		0.39397		0.28836
	0.84704		0.86105		0.49352		0.28847
	0.8073		0.76122		0.47268		0.28971
	0.75795		0.83422		0.33817		0.28979
	0.78676		0.82135		0.45938		0.29011
	0.72968		0.86662		0.56466		0.29045
	0.85664		0.82032		0.74101		0.29066
	0.80479		0.80712		0.44805		0.29138
	0.85202		0.81471		0.36663		0.29172
	0.90572		0.74521		0.41567		0.29193
	0.8367		0.83431		0.49523		0.29196
	0.81914		0.83987		0.465		0.29207
	0.76597		0.79382		0.4239		0.29245
	0.79692		0.81612		0.31267		0.2928
	0.85296		0.90856		0.45973		0.29287
	0.81068		0.82152		0.45727		0.29307
	0.86371		0.77856		0.43753		0.29316
	0.84717		0.87053		0.49948		0.29336
	0.65475		0.82178		0.41817		0.29345
	0.78588		0.79569		0.39836		0.2935
	0.82827		0.85285		0.3721		0.29365
	0.75151		0.83421		0.42599		0.29373
	0.69666		0.81224		0.39665		0.294
	0.87294		0.86506		0.37322		0.29413
	0.75839		0.80693		0.32051		0.2949
	0.74131		0.89268		0.36968		0.29543
	0.80986		0.84506		0.39831		0.29616
	0.7876		0.77445		0.48698		0.29672
	0.79839		0.79671		0.48251		0.29681
	0.80367		0.86785		0.42389		0.29711
	0.76164		0.81658		0.41751		0.29737
	0.76309		0.87777		0.46826		0.29792
	0.80581		0.82532		0.35879		0.29803
	0.73037		0.84464		0.3747		0.29819
	0.71067		0.90387		0.39848		0.29823
	0.84572		0.81037		0.47753		0.29864
	0.86269		0.75693		0.46686		0.29972
	0.78325		0.75639		0.35548		0.30057
	0.73297		0.82215		0.4911		0.30105
	0.82467		0.8434		0.48218		0.30135
	0.88917		0.85185		0.44394		0.30183
	0.76696		0.82914		0.419		0.30229
	0.76681		0.87548		0.41632		0.30263
	0.77621		0.83301		0.57324		0.30304
	0.83297		0.79738		0.38622		0.30321
	0.79123		0.79945		0.29994		0.30322
	0.75937		0.78897		0.46106		0.30334
	0.88008		0.75459		0.39867		0.30389
	0.8398		0.73618		0.54515		0.30487
	0.8293		0.70312		0.38275		0.3056
	0.81924		0.74471		0.38385		0.30568
	0.75974		0.87134		0.57773		0.30623
	0.82677		0.80925		0.45684		0.30682
	0.69042		0.82414		0.48947		0.3072
	0.76427		0.92303		0.57878		0.30724
	0.85313		0.37254		0.46889		0.30734
	0.70587		0.39907		0.46814		0.30741
	0.66627		0.3898		0.46327		0.30743
	0.81667		0.40717		0.42354		0.30796
	0.81121		0.40239		0.27196		0.30803
	0.7601		0.48742		0.45227		0.30814
	0.7897		0.36059		0.34058		0.30838
	0.74071		0.42818		0.52351		0.30885
	0.73295		0.29903		0.63732		0.30906
	0.88388		0.42826		0.33674		0.30909
	0.83165		0.41636		0.20984		0.30932
	0.77763		0.46836		0.17274		0.30942
	0.81155		0.4443		0.16969		0.30986
	0.73307		0.34813		0.17382		0.31013
	0.82221		0.3709		0.084633		0.3106
	0.81766		0.35968		0.1183		0.31095
	0.8001		0.49537		0.15902		0.31109
	0.83264		0.41431		0.21496		0.3115
	0.75625		0.2981		0.19105		0.31195
	0.77522		0.43012		0.21689		0.31227
	0.76497		0.48469		0.19316		0.3123
	0.78009		0.33444		0.1857		0.31235
	0.78665		0.30701		0.12504		0.3126
	0.80589		0.50074		0.2557		0.31269
	0.813		0.46508		0.35419		0.31277
	0.82352		0.33006		0.14209		0.31299
	0.83667		0.41315		0.1288		0.31391
	0.86274		0.40711		0.12448		0.31457
	0.84566		0.38608		0.2074		0.31471
	0.81398		0.50257		0.21663		0.31483
	0.68653		0.38511		0.36749		0.31563
	0.83682		0.48844		0.37545		0.31566
	0.83139		0.34974		0.30055		0.31615
	0.70682		0.38706		0.19223		0.31629
	0.89506		0.39318		0.28053		0.31649
	0.77117		0.41694		0.26305		0.31689
	0.94859		0.46368		0.19602		0.31743
	0.87628		0.40136		0.29311		0.31857
	0.90342		0.37554		0.22916		0.31868
	0.75154		0.41417		0.26914		0.31875
	0.8459		0.38484		0.32091		0.31918
	0.69627		0.45925		0.67391		0.31932
	0.75684		0.44249		0.71316		0.31947
	0.76961		0.38252		0.42242		0.31971
	0.8052		0.38584		0.35602		0.31999
	0.65349		0.37245		0.24389		0.32026
	0.7914		0.51057		0.22905		0.32048
	0.75753		0.5556		0.099478		0.32072
	0.68738		0.42164		0.2682		0.32075
	0.88552		0.33033		0.074541		0.32083
	0.84391		0.43951		0.15244		0.32089
	0.75196		0.45017		0.16588		0.32132
	0.78508		0.50476		0.1143		0.32132
	0.90486		0.44361		0.064715		0.32211
	0.85309		0.40249		0.36731		0.32231
	0.84894		0.40888		0.41276		0.32241
	0.8845		0.48477		0.24145		0.32276
	0.8101		0.40498		0.3089		0.32304
	0.79739		0.37417		0.28872		0.32338
	0.77742		0.39274		0.20027		0.32369
	0.69514		0.47871		0.11765		0.32399
	0.82506		0.41302		0.28423		0.32409
	0.77024		0.39657		0.36891		0.32421
	0.74773		0.39512		0.37123		0.32461
	0.63585		0.36168		0.4737		0.32479
	0.81423		0.51233		0.42826		0.32492
	0.74874		0.47062		0.318		0.32496
	0.7568		0.43916		0.46407		0.32502
	0.80426		0.50506		0.30619		0.32516
	0.85494		0.65271		0.30712		0.32532
	0.83662		0.46443		0.5994		0.32532
	0.76473		0.48134		0.41846		0.32533
	0.90005		0.40689		0.38803		0.32538
	0.59514		0.44706		0.34855		0.32543
	0.78066		0.50518		0.27067		0.32565
	0.90642		0.39788		0.2269		0.32572
	0.62731		0.46561		0.12521		0.32576
	0.95899		0.423		0.13973		0.32602
	0.75761		0.48213		0.10801		0.32602
	0.8628		0.15574		0.2536		0.32623
	0.81129		0.15104		0.30405		0.32645
	0.79239		0.18454		0.3954		0.32646
	0.81504		0.27366		0.24676		0.32703
	0.75396		0.3048		0.41213		0.32727
	0.83278		0.34292		0.41526		0.32745
	0.76745		0.22516		0.42745		0.32754
	0.9099		0.19623		0.34701		0.32754
	0.6825		0.31879		0.39611		0.32768
	0.74726		0.27507		0.45351		0.32797
	0.82659		0.20782		0.31309		0.3281
	0.8821		0.18987		0.42598		0.32823
	0.71916		0.16944		0.41474		0.32839
	0.75646		0.31192		0.44748		0.32843
	0.81426		0.17921		0.30047		0.32915
	0.74743		0.29787		0.35653		0.32923
	0.7498		0.25489		0.2053		0.32925
	0.55396		0.24197		0.24435		0.32947
	0.57156		0.23007		0.39602		0.32965
	0.89596		0.16076		0.26499		0.33003
	0.70438		0.25074		0.34497		0.33015
	0.79868		0.1457		0.37116		0.33065
	0.91401		0.16377		0.34813		0.33073
	0.87235		0.22095		0.56472		0.33105
	0.80018		0.26431		0.25289		0.33123
	0.7975		0.26836		0.4097		0.3313
	0.87551		0.21968		0.46081		0.33132
	0.8219		0.10767		0.26403		0.33141
	0.8914		0.24485		0.40676		0.33142
	0.76066		0.30849		0.54762		0.3318
	0.68929		0.14133		0.31091		0.33196
	0.70234		0.15288		0.25367		0.33238
	0.8258		0.14392		0.27362		0.33255
	0.76105		0.23099		0.2828		0.33276
	0.79499		0.16714		0.26292		0.33286
	0.79383		0.22582		0.32807		0.33298
	0.89892		0.24261		0.22307		0.33301
	0.85625		0.27017		0.25782		0.33316
	0.86316		0.22634		0.25938		0.33331
	0.8169		0.12031		0.22886		0.33395
	0.7588		0.1093		0.26093		0.33437
	0.70483		0.28589		0.23577		0.33453
	0.82665		0.21267		0.21127		0.33484
	0.8798		0.2915		0.2846		0.33505
	0.82274		0.16769		0.33238		0.33526
	0.69873		0.1337		0.28929		0.33535
	0.70092		0.18704		0.22687		0.33546
	0.79359		0.41272		0.23346		0.33592
	0.83393		0.26141		0.18211		0.33603
	0.91607		0.2775		0.12295		0.33667
	0.87707		0.13544		0.1925		0.33697
	0.87073		0.21027		0.37859		0.33777
	0.77013		0.19572		0.31666		0.33785
	0.84261		0.21966		0.32931		0.33789
	0.73891		0.11295		0.2692		0.33822
	0.82851		0.19756		0.34635		0.33827
	0.77917		0.28268		0.32125		0.33832
	0.9478		0.33411		0.1527		0.33873
	0.81545		0.10843		0.22379		0.33891
	0.90871		0.13404		0.12206		0.33908
	0.68182		0.12071		0.092224		0.3391
	0.80282		0.29879		0.103		0.33971
	0.7886		0.10369		0.1423		0.3399
	0.78185		0.16885		0.18633		0.33993
	0.7974		0.25608		0.1657		0.33995
	0.87549		0.18886		0.20346		0.34017
	0.8702		0.15853		0.61449		0.34019
	0.76793		0.21047		0.58375		0.34043
	0.79292		0.26242		0.42841		0.34063
	0.85587		0.27951		0.48987		0.34085
	0.68243		0.20444		0.56896		0.34093
	0.77834		0.26723		0.62188		0.341
	0.83428		0.090809		0.48973		0.34101
	0.92099		0.22954		0.55544		0.34106
	0.82698		0.25004		0.55168		0.34135
	0.73458		0.25193		0.52507		0.34142
	0.9911		0.087751		0.52894		0.34164
	0.91685		0.22013		0.57445		0.34165
	0.89907		0.2072		0.53032		0.34186
	0.77992		0.28277		0.5507		0.3419
	0.75959		0.13096		0.64918		0.34297
	0.78474		0.31131		0.55557		0.34321
	0.80997		0.24175		0.35844		0.34344
	0.7831		0.22463		0.34103		0.34344
	0.79449		0.16126		0.15644		0.34345
	0.7423		0.14411		0.27162		0.3435
	0.76576		0.090208		0.24423		0.34356
	0.75602		0.18971		0.55695		0.34382
	0.86863		0.20801		0.56304		0.34409
	0.7913		0.26798		0.55857		0.34425
	0.80634		0.25512		0.5253		0.34425
	0.79772		0.23637		0.30523		0.34437
	0.74776		0.23172		0.43558		0.34446
	0.78133		0.30117		0.54906		0.34462
	0.78323		0.22687		0.59561		0.34465
	0.81924		0.21913		0.47804		0.3447
	0.86319		0.313		0.49931		0.34489
	0.82334		0.1757		0.61451		0.34496
	0.82482		0.34543		0.49192		0.34551
	0.85317		0.19076		0.58203		0.34583
	0.8721		0.22576		0.61558		0.34586
	0.8843		0.31814		0.48084		0.34588
	0.88316		0.19019		0.53377		0.34653
	0.7936		0.13475		0.46981		0.34711
	0.82888		0.43428		0.34158		0.34752
	0.82801		0.34305		0.54006		0.3476
	0.8243		0.35513		0.58796		0.34778
	0.9693		0.22641		0.49355		0.34792
	0.9018		0.23633		0.47787		0.34793
	0.82644		0.26243		0.52295		0.34797
	0.89695		0.20805		0.63909		0.34814
			0.3545		0.45753		0.34816
			0.37289		0.5101		0.34838
			0.27038		0.59475		0.3484
			0.21171		0.55798		0.34863
			0.26898		0.48203		0.34864
			0.19209		0.5851		0.34907
			0.39376		0.52064		0.34938
			0.27944		0.64093		0.34991
			0.25691		0.57343		0.35
			0.37382		0.38993		0.35143
			0.18144		0.53415		0.35197
			0.28279		0.52197		0.35197
			0.28827		0.35361		0.35207
			0.24431		0.47739		0.35212
			0.24309		0.53697		0.35217
			0.27193		0.61381		0.35227
			0.29432		0.41351		0.35264
			0.33768		0.40728		0.35294
			0.36703		0.72531		0.35309
			0.23481		0.5839		0.35313
			0.33857		0.58229		0.35316
			0.19229		0.67122		0.35324
			0.2303		0.61199		0.35351
			0.23916		0.52708		0.35354
			0.27758		0.59141		0.35369
			0.37281		0.58556		0.35381
			0.35407		0.61914		0.35435
			0.26148		0.54032		0.35446
			0.26712		0.61643		0.35473
			0.26882		0.24741		0.35475
			0.13726		0.53712		0.35485
			0.31538		0.62427		0.3551
			0.27585		0.59213		0.35523
			0.25212		0.41536		0.35534
			0.29706		0.55993		0.3554
			0.30813		0.53168		0.35541
			0.21714		0.55869		0.35548
			0.33671		0.5743		0.35559
			0.12839		0.45745		0.35587
			0.27813		0.45482		0.35589
			0.21097		0.55963		0.35605
			0.23203		0.50789		0.35665
			0.24098		0.586		0.35671
			0.21645		0.57079		0.35691
			0.12642		0.59624		0.35696
			0.19823		0.62554		0.35705
			0.27533		0.58475		0.35727
			0.22726		0.55093		0.35734
			0.38532		0.56849		0.35758
			0.20975		0.45764		0.35761
			0.35636		0.73615		0.35791
			0.17829		0.67343		0.35792
			0.29775		0.59629		0.35826
			0.23324		0.59038		0.35859
			0.22672		0.49896		0.35874
			0.28972		0.56157		0.35886
			0.23563		0.70904		0.35947
			0.31531		0.60844		0.35948
			0.24167		0.36005		0.3596
			0.20691		0.52905		0.35962
			0.29533		0.65595		0.35963
			0.24711		0.47129		0.36014
			0.31688		0.63578		0.36052
			0.27419		0.70929		0.36089
			0.32085		0.68827		0.36136
			0.20954		0.60499		0.36138
			0.31014		0.53583		0.3614
			0.24234		0.55357		0.36148
			0.2164		0.67687		0.36155
			0.23404		0.63397		0.36163
			0.24275		0.71007		0.36189
			0.2277		0.74364		0.36222
			0.37218		0.68629		0.36302
			0.43241		0.61237		0.36313
			0.55283		0.725		0.36316
			0.69851		0.72068		0.36328
			0.46337		0.70279		0.36332
	0.45597		0.50885		0.72252		0.36334
	0.52407		0.46583		0.62348		0.36353
	0.62637		0.56102		0.60187		0.36392
	0.44927		0.52272		0.62476		0.36433
	0.5169		0.62977		0.65713		0.36449
	0.51059		0.56686		0.62518		0.3645
	0.67537		0.50034		0.51623		0.36453
	0.66017		0.43065		0.62323		0.36481
	0.64205		0.51518		0.58821		0.36491
	0.51958		0.38939		0.69702		0.36492
	0.65862		0.23439		0.67183		0.36495
	0.67875		0.61635		0.55113		0.36511
	0.56621		0.60546		0.57676		0.36531
	0.70465		0.4885		0.61756		0.36582
	0.86298		0.50844		0.58849		0.36598
	0.71389		0.26318		0.63749		0.36613
	0.72226		0.52234		0.67408		0.3664
	0.62331		0.46298		0.52193		0.36688
	0.54217		0.313		0.53346		0.36691
	0.56333		0.39983		0.49339		0.36717
	0.70688		0.31875		0.62139		0.36741
	0.63343		0.45113		0.52283		0.36791
	0.60052		0.37384		0.54387		0.36811
	0.57664		0.4693		0.54434		0.36831
	0.63527		0.44188		0.39411		0.36832
	0.75185		0.64376		0.39397		0.36834
	0.54816		0.57031		0.42008		0.3685
	0.68353		0.37294		0.48203		0.3685
	0.75477		0.52686		0.47084		0.36852
	0.78031		0.6781		0.42522		0.36857
	0.57428		0.59306		0.44202		0.3686
	0.64517		0.63892		0.49022		0.36874
	0.70336		0.64907		0.44589		0.36901
	0.60814		0.58619		0.42137		0.3692
	0.76916		0.65848		0.57991		0.37007
	0.75205		0.64373		0.51099		0.3701
	0.6448		0.63256		0.4001		0.37039
	0.48195		0.5493		0.50489		0.37079
	0.58854		0.57068		0.45408		0.37103
	0.71042		0.59374		0.32915		0.37108
	0.65676		0.47891		0.39385		0.37115
	0.73317		0.62721		0.32113		0.37166
	0.66585		0.41719		0.26203		0.3719
	0.86008		0.6036		0.39512		0.37193
	0.72482		0.51153		0.35553		0.37207
	0.40304		0.59807		0.33884		0.37225
	0.58325		0.44704		0.53339		0.37233
	0.48886		0.47213		0.39744		0.37247
	0.70127		0.44676		0.44415		0.37256
	0.66747		0.51643		0.54142		0.37285
	0.6218		0.64365		0.41356		0.37292
	0.49573		0.57437		0.54094		0.37328
	0.67137		0.51561		0.43092		0.37333
	0.59103		0.35489		0.56442		0.3734
	0.68678		0.38704		0.38743		0.37346
	0.52271		0.48027		0.533		0.37377
	0.54169		0.49309		0.47402		0.37405
	0.59688		0.59892		0.57601		0.37444
	0.79037		0.35517		0.29913		0.37445
	0.60408		0.3044		0.42853		0.37449
	0.83232		0.18332		0.55527		0.37459
	0.69683		0.52842		0.57447		0.37465
	0.47267		0.51925		0.69581		0.37486
	0.55302		0.45983		0.45545		0.37504
	0.52557		0.59556		0.32382		0.37547
	0.54617		0.58621		0.364		0.37558
	0.55878		0.58239		0.47151		0.37597
	0.4377		0.53199		0.56056		0.37616
	0.65228		0.51969		0.4172		0.37634
	0.86518		0.50177		0.48079		0.37637
	0.79055		0.3171		0.53339		0.3768
	0.62127		0.61686		0.70804		0.37701
	0.5429		0.43848		0.48235		0.37715
	0.61376		0.58131		0.36872		0.37731
	0.6982		0.37183		0.27187		0.37761
	0.79369		0.41731		0.37877		0.37774
	0.80774		0.61845		0.56231		0.37783
	0.56594		0.63297		0.34144		0.37784
	0.86602		0.69099		0.41482		0.37794
	0.83388		0.55394		0.49351		0.3783
	0.766		0.60544		0.53417		0.37839
	0.61567		0.30979		0.58597		0.37839
	0.60825		0.27743		0.47152		0.37846
	0.79279		0.34477		0.5853		0.37858
	0.71906		0.61255		0.48633		0.3788
	0.64808		0.5492		0.36427		0.37905
	0.66991		0.62669		0.58891		0.37925
	0.74323		0.50345		0.58338		0.37926
	0.64168		0.56545		0.46371		0.37994
	0.74156		0.53401		0.30316		0.38003
	0.75462		0.47536		0.47958		0.38004
	0.78396		0.34291		0.49852		0.38017
	0.65577		0.50462		0.16676		0.38031
	0.79775		0.39093		0.39569		0.38068
	0.7312		0.62023		0.4328		0.38079
	0.79115		0.59875		0.50124		0.38094
	0.71535		0.59618		0.54351		0.38097
	0.84792		0.533		0.40391		0.38119
	0.81605		0.58107		0.37045		0.38129
	0.7048		0.50342		0.53373		0.38146
	0.66777		0.58738		0.42404		0.38147
	0.78906		0.57255		0.46455		0.38162
	0.8668		0.41115		0.38874		0.38176
	0.72709		0.62438		0.41903		0.38177
	0.73208		0.51789		0.32081		0.38197
	0.71152		0.56041		0.3697		0.38222
	0.78413		0.3287		0.4162		0.38229
	0.61842		0.39659		0.33648		0.38242
	0.64281		0.60397		0.52909		0.38244
	0.73344		0.30396		0.30879		0.38248
	0.67818		0.63129		0.47724		0.3831
	0.665		0.53091		0.44078		0.38343
	0.66071		0.48669		0.43659		0.38346
	0.66853		0.59654		0.4312		0.38375
	0.87034		0.43793		0.5407		0.38397
	0.74304		0.67611		0.59361		0.38428
	0.73649		0.50116		0.65404		0.38432
	0.7083		0.55252		0.49331		0.3845
	0.66627		0.65141		0.35271		0.38501
	0.69569		0.52577		0.33702		0.38507
	0.74894		0.51152		0.38814		0.38531
	0.75804		0.56022		0.28072		0.38559
	0.89233		0.52192		0.35363		0.38562
	0.89922		0.46932		0.36184		0.38564
	0.80788		0.52565		0.55771		0.38571
	0.81211		0.43399		0.53035		0.38599
	0.80292		0.47412		0.61507		0.38602
	0.85437		0.47608		0.66867		0.38631
	0.84861		0.32383		0.78469		0.38667
	0.74275		0.58194		0.48987		0.38681
	0.85435		0.50043		0.70598		0.38797
	0.77289		0.53039		0.52531		0.38802
	0.85017		0.62164		0.58667		0.38803
	0.79378		0.56725		0.56152		0.38829
	0.84165		0.58535		0.61563		0.38856
	0.77875		0.59432		0.75052		0.38865
	0.92241		0.433		0.48877		0.38878
	0.86337		0.5603		0.56685		0.38943
	0.91528		0.63328		0.61368		0.38949
	0.82976		0.64632		0.67455		0.38951
	0.77886		0.59364		0.70417		0.38991
	0.79064		0.57938		0.35466		0.39009
	0.7582		0.65341		0.42154		0.3902
	0.72902		0.54163		0.31629		0.3904
	0.74612		0.59266		0.31182		0.39062
	0.89882		0.57647		0.47421		0.39094
	0.65242		0.5864		0.42472		0.39106
	0.78788		0.46884		0.44591		0.39119
	0.80121		0.60855		0.44917		0.39121
	0.83977		0.55692		0.41819		0.39147
	0.88124		0.51362		0.5661		0.39177
	0.87436		0.60446		0.49207		0.392
	0.79667		0.56297		0.44132		0.3922
	0.93275		0.3617		0.45851		0.39238
	0.8394		0.57044		0.48169		0.39279
	0.79115		0.60134		0.44713		0.39293
	0.83838		0.42684		0.61035		0.39298
	0.91772		0.61273		0.45653		0.393
	0.90387		0.5896		0.4917		0.39304
	0.93837		0.46689		0.46934		0.3931
	0.81637		0.60552		0.43915		0.39356
	0.86543		0.66251		0.60259		0.39376
	0.91086		0.54631		0.47558		0.39394
	0.87101		0.6265		0.66041		0.39404
	0.79805		0.5737		0.73326		0.39464
	0.88646		0.60182		0.33452		0.39482
	0.82358		0.56409		0.27502		0.39495
	0.8494		0.50824		0.25313		0.39503
	0.85659		0.58913		0.29148		0.39507
	0.79064		0.66253		0.22373		0.39542
	0.79133		0.62191		0.39735		0.39569
	0.85686		0.45813		0.39446		0.39583
	0.8206		0.46845		0.27401		0.3959
	0.80164		0.57532		0.26555		0.39592
	0.81575		0.60901		0.31891		0.39616
	0.84771		0.59023		0.25189		0.39652
	0.89227		0.51759		0.28507		0.39671
	0.86335		0.53946		0.38367		0.39677
	0.81834		0.44992		0.49279		0.39729
	0.77103		0.5901		0.31171		0.39731
	0.83586		0.59249		0.32455		0.39732
	0.8628		0.57453		0.38613		0.39751
	0.81924		0.34086		0.34702		0.39766
	0.84376		0.62263		0.5344		0.39766
	0.80587		0.45787		0.35873		0.39768
	0.83341		0.57015		0.37918		0.39768
	0.81997		0.51336		0.42667		0.39781
	0.83631		0.33149		0.35005		0.39789
	0.81203		0.25727		0.37298		0.39855
	0.89309		0.40703		0.36923		0.39894
	0.86719		0.20239		0.26489		0.39902
	0.88942		0.34859		0.3946		0.39903
	0.74722		0.1979		0.38903		0.3991
	0.57866		0.020835		0.39659		0.39928
	0.71993		0.33128		0.36531		0.39946
	0.68974		0.42157		0.41569		0.3996
	0.71475		0.58805		0.35219		0.40037
	0.68865		0.54149		0.30759		0.40069
	0.85247		0.90378		0.31835		0.40092
	0.66712		0.85686		0.31469		0.40102
	0.72346		0.80327		0.39997		0.40107
	0.72263		0.85063		0.45197		0.40116
	0.78405		0.88647		0.40664		0.40133
	0.7934		0.79669		0.26472		0.40136
	0.86167		0.8124		0.47011		0.40141
	0.83644		0.71879		0.31205		0.40193
	0.76754		0.92927		0.44267		0.40227
	0.82344		0.83409		0.37188		0.40298
	0.72794		0.94501		0.47463		0.40302
	0.9419		0.971		0.23485		0.40351
	0.79068		0.8443		0.3361		0.40354
	0.68577		0.84077		0.44464		0.40365
	0.73295		0.89222		0.34606		0.40416
	0.71041		0.91302		0.38621		0.40452
	0.79256		0.86925		0.39866		0.40462
	0.66231		0.86229		0.4191		0.40483
	0.80003		0.97103		0.57374		0.40503
	0.79589		0.83414		0.3786		0.40544
	0.57346		0.82606		0.49164		0.40587
	0.68167		0.83966		0.59537		0.40623
	0.77559		0.88678		0.45268		0.40635
	0.73102		0.92739		0.49205		0.40643
	0.71834		0.85782		0.40896		0.40659
	0.63118		0.88513		0.3782		0.40675
	0.60784		0.80239		0.41742		0.40701
	0.67642		0.95311		0.52117		0.4071
	0.64891		0.92326		0.5763		0.40738
	0.57788		0.82435		0.48984		0.4076
	0.57851		0.85512		0.5654		0.4081
	0.62937		0.98529		0.48139		0.40815
	0.69692		0.91735		0.3774		0.40818
	0.71929		0.841		0.51582		0.40819
	0.77925		0.85275		0.51464		0.40862
	0.68633		0.92212		0.48957		0.4087
	0.78028		0.85187		0.49531		0.40906
	0.5323		0.96414		0.5696		0.40907
	0.64212		0.91103		0.37116		0.40944
	0.71484		0.8887		0.40405		0.40945
	0.57806		0.86493		0.49535		0.40959
	0.68588		0.91075		0.48866		0.4098
	0.68695		0.91242		0.40109		0.4101
	0.62539		0.86147		0.52545		0.41015
	0.66349		0.82683		0.4713		0.4103
	0.64756		0.76202		0.44044		0.41037
	0.67909		0.73766		0.46997		0.4104
	0.64961		0.91321		0.51535		0.4105
	0.70962		0.59034		0.61143		0.41058
	0.65347		0.55544		0.52318		0.41064
	0.59517		0.59018		0.55634		0.41096
	0.68021		0.66791		0.44016		0.41122
	0.67269		0.65179		0.40627		0.412
	0.57861		0.73611		0.5556		0.41207
	0.5216		0.62982		0.59246		0.41227
	0.68442		0.56644		0.41036		0.41245
	0.63331		0.58514		0.54504		0.41262
	0.56992		0.67971		0.36251		0.41267
	0.54983		0.72544		0.50172		0.41274
	0.78777		0.6285		0.45789		0.41295
	0.68794		0.58546		0.49254		0.41296
	0.65734		0.5579		0.49677		0.4131
	0.64373		0.55886		0.40408		0.41322
	0.64547		0.60314		0.28716		0.41342
	0.55344		0.63333		0.52866		0.41371
	0.73806		0.67316		0.52549		0.41423
	0.63388		0.6392		0.60944		0.41426
	0.60926		0.59642		0.61369		0.41442
	0.61685		0.5961		0.51515		0.41446
	0.6264		0.5494		0.59907		0.41449
	0.65297		0.61424		0.40224		0.41471
	0.61586		0.68761		0.45047		0.41492
	0.70186		0.63579		0.44715		0.41504
	0.65381		0.60643		0.45059		0.41544
	0.73972		0.60657		0.29481		0.4155
	0.66181		0.68878		0.5231		0.41556
	0.75876		0.66036		0.50685		0.41584
	0.7107		0.63167		0.4807		0.41611
	0.45225		0.6422		0.49885		0.41651
	0.67558		0.58187		0.46618		0.41676
	0.52523		0.54483		0.62863		0.41694
	0.71163		0.61645		0.5222		0.417
	0.5414		0.5847		0.32286		0.41712
	0.7203		0.68101		0.48881		0.41718
	0.61181		0.55982		0.45909		0.41727
	0.72092		0.56346		0.57749		0.41739
	0.55804		0.61427		0.6317		0.41741
	0.6591		0.65262		0.56163		0.41794
	0.76485		0.63665		0.54786		0.41806
	0.52736		0.60179		0.39695		0.41809
	0.61421		0.71623		0.53477		0.41819
	0.60896		0.63379		0.59291		0.41829
	0.70466		0.60712		0.45523		0.41839
	0.6668		0.61984		0.59253		0.41879
	0.57986		0.65726		0.39621		0.419
	0.62307		0.64773		0.53686		0.41903
	0.60693		0.61676		0.45399		0.41915
	0.61996		0.62115		0.5942		0.41927
	0.63734		0.63411		0.50651		0.41945
	0.73937		0.70527		0.44842		0.41965
	0.52505		0.68427		0.44146		0.42009
	0.65324		0.66419		0.29548		0.42044
	0.57946		0.52819		0.51158		0.42057
	0.63874		0.54174		0.49416		0.42086
	0.59619		0.67976		0.39283		0.42089
	0.61915		0.61371		0.46445		0.42091
	0.74031		0.61077		0.47643		0.42101
	0.60133		0.68849		0.32898		0.42102
	0.7085		0.58714		0.2101		0.42126
	0.56054		0.74156		0.13956		0.42137
	0.67774		0.60051		0.067567		0.42164
	0.7716		0.63781		0.21084		0.42186
	0.59879		0.6549		0.20534		0.4219
	0.52151		0.73234		0.45348		0.42258
	0.65267		0.78095		0.50505		0.42272
	0.6292		0.61814		0.45884		0.42294
	0.71008		0.58379		0.51767		0.42296
	0.7435		0.61759		0.42138		0.42329
	0.57276		0.64857		0.50955		0.42329
	0.66207		0.62305		0.53772		0.42331
	0.64837		0.50572		0.46868		0.42365
	0.60697		0.6539		0.62115		0.4237
	0.60721		0.54201		0.42277		0.42381
	0.70658		0.68544		0.45504		0.42505
	0.67108		0.60919		0.56238		0.42545
	0.68988		0.56972		0.62672		0.4256
	0.53734		0.66539		0.47598		0.42564
	0.68992		0.70133		0.54528		0.42571
	0.68055		0.70897		0.55844		0.42583
	0.6902		0.58759		0.41082		0.4259
	0.66195		0.67893		0.57702		0.42609
	0.617		0.56973		0.52468		0.42674
	0.63543		0.65196		0.45789		0.42779
	0.87079		0.61268		0.53166		0.42793
	0.81269		0.51741		0.52825		0.42823
	0.82912		0.59222		0.31782		0.42849
	0.73491		0.52455		0.37797		0.42879
	0.91813		0.56932		0.51824		0.42882
	0.73253		0.69012		0.60385		0.42883
	0.87286		0.78969		0.52505		0.42911
	0.79685		0.59513		0.53029		0.42911
	0.83608		0.65559		0.35458		0.42918
	0.87781		0.65979		0.50373		0.42932
	0.82774		0.64131		0.37614		0.42954
	0.929		0.62482		0.56436		0.42981
	0.86204		0.50141		0.39893		0.42984
	0.79249		0.58438		0.49942		0.42995
	0.85714		0.59204		0.5945		0.43012
	0.75495		0.57962		0.47074		0.43019
	0.87569		0.75261		0.50275		0.4304
	0.76326		0.58912		0.54535		0.43045
	0.8367		0.5807		0.44278		0.43088
	0.86412		0.53518		0.41615		0.43117
	0.86354		0.7653		0.31358		0.43124
	0.9273		0.72756		0.51022		0.43134
	0.92441		0.6452		0.54467		0.43144
	0.77468		0.71243		0.47881		0.43185
	0.93214		0.64714		0.46691		0.43228
	0.83972		0.71452		0.36017		0.43238
	0.93974		0.6717		0.50042		0.43246
	0.82593		0.55234		0.3934		0.43257
	0.83523		0.63321		0.46375		0.43289
	0.8124		0.60854		0.55127		0.43289
	0.89113		0.62263		0.44634		0.43313
	0.87607		0.62313		0.51672		0.43327
	0.76412		0.67283		0.57378		0.43383
	0.84387		0.6104		0.45925		0.43384
	0.84767		0.62392		0.33037		0.43392
	0.90877		0.67554		0.49003		0.43406
	0.7911		0.5804		0.38484		0.43417
	0.82815		0.70386		0.5132		0.4344
	0.78746		0.67579		0.4758		0.43447
	0.80815		0.65094		0.49486		0.43456
	0.89989		0.65516		0.5403		0.43466
	0.8305		0.67392		0.58399		0.43487
	0.85936		0.69979		0.47452		0.43514
	0.80793		0.54821		0.43518		0.43526
	0.7578		0.6475		0.51212		0.43581
	0.86085		0.61139		0.58322		0.43589
	0.79067		0.49726		0.49451		0.43607
	0.83026		0.61335		0.54186		0.43618
	0.90141		0.65716		0.35935		0.4362
	0.84737		0.66738		0.37138		0.43668
	0.7446		0.70178		0.54396		0.43673
	0.87028		0.58851		0.50173		0.43707
	0.83409		0.60139		0.31235		0.43707
	0.58345		0.66793		0.34766		0.43714
	0.69972		0.65201		0.39966		0.4373
	0.55965		0.4834		0.53513		0.43747
	0.79528		0.61291		0.57702		0.43752
	0.82661		0.60637		0.45662		0.43772
	0.86256		0.6293		0.4489		0.43784
	0.82424		0.7123		0.51882		0.43816
	0.79365		0.59889		0.44656		0.43838
	0.84279		0.68525		0.5517		0.43916
	0.82844		0.65427		0.56994		0.43951
	0.85017		0.67378		0.5055		0.43967
	0.74142		0.61802		0.50485		0.43968
	0.80102		0.57199		0.62526		0.43972
	0.87585		0.63027		0.39773		0.43986
	0.8594		0.5308		0.41699		0.44007
	0.83129		0.6725		0.49958		0.44035
	0.74384		0.73905		0.42322		0.44046
	0.81188		0.6881		0.47434		0.4409
	0.85612		0.56667		0.45095		0.44108
	0.66138		0.60545		0.45117		0.44125
	0.7221		0.57951		0.41262		0.4419
	0.82763		0.64504		0.53488		0.44214
	0.74019		0.60588		0.49002		0.44238
	0.79397		0.62075		0.42652		0.44271
	0.72935		0.62953		0.49035		0.44272
	0.88698		0.66204		0.42271		0.443
	0.89307		0.59902		0.48368		0.44331
	0.68576		0.66963		0.47093		0.44348
	0.80099		0.56898		0.49999		0.44354
	0.83091		0.61053		0.4513		0.44362
	0.808		0.62311		0.36372		0.444
	0.88309		0.66812		0.49504		0.44483
	0.78981		0.58821		0.43047		0.44503
	0.99635		0.65464		0.48013		0.44524
	0.87745		0.62144		0.51535		0.44542
	0.74327		0.57317		0.42323		0.44544
	0.90783		0.65356		0.40238		0.44555
	0.83235		0.6732		0.52361		0.44595
	0.79371		0.75239		0.4862		0.44625
	0.75795		0.74139		0.52745		0.44628
	0.91315		0.6259		0.43664		0.44642
	0.80971		0.59225		0.33412		0.44693
	0.81124		0.62745		0.3707		0.44711
	0.83782		0.58652		0.46023		0.44712
	0.82354		0.5469		0.3927		0.44728
	0.78358		0.56253		0.49506		0.44757
	0.86328		0.67288		0.45428		0.44787
	0.7881		0.66428		0.46642		0.44798
	0.89306		0.54092		0.48966		0.44805
	0.85314		0.67273		0.50321		0.44838
	0.79923		0.59983		0.44455		0.44855
	0.81263		0.65833		0.49989		0.44867
	0.91075		0.63498		0.42262		0.44877
	0.85317		0.57841		0.45209		0.44879
	0.71907		0.66632		0.51529		0.44901
	0.85555		0.75184		0.45511		0.44925
	0.82156		0.40968		0.43947		0.4493
	0.76091		0.64736		0.50903		0.4498
	0.89063		0.74794		0.46725		0.44985
	0.85256		0.49684		0.39893		0.44996
	0.8164		0.59137		0.59428		0.45001
	0.80777		0.63388		0.55775		0.45027
	0.80595		0.68609		0.46223		0.45031
	0.87468		0.48051		0.39808		0.45093
	1.0131		0.62241		0.47604		0.45098
	0.73436		0.60911		0.42041		0.45112
	0.78641		0.70347		0.66313		0.45135
	0.84224		0.57444		0.44586		0.45143
	0.80582		0.53647		0.4641		0.45168
	0.71527		0.58029		0.516		0.45184
	0.85817		0.66633		0.44992		0.45187
	0.84964		0.69994		0.37771		0.45197
	0.80807		0.63384		0.50307		0.45202
	0.72458		0.61446		0.32244		0.45203
	0.8746		0.71021		0.32006		0.45219
	0.91442		0.57185		0.47081		0.45225
	0.91563		0.65383		0.35915		0.45235
	0.95209		0.53737		0.41031		0.45254
	0.84984		0.62121		0.40501		0.45306
	0.86531		0.59936		0.37147		0.45309
	0.79831		0.66037		0.59122		0.45312
	0.86912		0.582		0.43654		0.45334
	0.65985		0.56641		0.30864		0.45385
	0.88054		0.61483		0.43169		0.45431
	0.78356		0.60544		0.36722		0.45433
	0.79415		0.63858		0.46061		0.45454
	0.78841		0.59798		0.65887		0.45607
	0.84382		0.58601		0.62603		0.45666
	0.80729		0.67487		0.41698		0.45683
	0.81333		0.76092		0.51425		0.45696
	0.88362		0.59339		0.47849		0.45734
	0.87518		0.47072		0.34955		0.45792
	0.76548		0.57135		0.49538		0.45799
	0.79236		0.5897		0.70834		0.45801
	0.80139		0.56984		0.68106		0.45807
	0.7725		0.64983		0.64659		0.4581
	0.84232		0.55197		0.66899		0.45817
	0.82241		0.48489		0.6497		0.45828
	0.85047		0.55193		0.62384		0.4584
	0.82525		0.61649		0.4686		0.45841
	0.88733		0.58721		0.57251		0.45859
	0.84283		0.70272		0.50601		0.45871
	0.82589		0.64481		0.64707		0.45878
	0.78779		0.62587		0.61858		0.45891
	0.83078		0.64109		0.6811		0.45963
	0.88054		0.62735		0.69298		0.46003
	0.77252		0.60047		0.60293		0.4601
	0.8373		0.63522		0.54058		0.46019
	0.81112		0.69127		0.54338		0.46038
	0.85064		0.5704		0.40844		0.4606
	0.79825		0.70381		0.66888		0.4606
	0.8364		0.60925		0.6428		0.46068
	0.78212		0.5599		0.69845		0.46071
	0.84668		0.52849		0.60697		0.46085
	0.79088		0.48931		0.7013		0.4609
	0.88004		0.63877		0.63862		0.46125
	0.79353		0.60559		0.72512		0.46239
	0.82463		0.70859		0.63434		0.46257
	0.83489		0.66731		0.63409		0.46288
	0.8237		0.71422		0.61052		0.46331
	0.8248		0.65659		0.64979		0.46342
	0.80565		0.63844		0.547		0.46364
	0.84563		0.66149		0.52205		0.46388
	0.82913		0.63874		0.74835		0.46404
	0.76649		0.67103		0.64802		0.46447
	0.77283		0.70627		0.74222		0.46457
	0.76568		0.69355		0.58885		0.46562
	0.80324		0.62892		0.63219		0.46586
	0.73729		0.63821		0.60211		0.46597
	0.81091		0.60405		0.4555		0.46609
	0.7464		0.68889		0.67586		0.46718
	0.81612		0.634		0.58122		0.46742
	0.77775		0.63686		0.57548		0.46757
	0.83023		0.58918		0.65263		0.4679
	0.81667		0.73613		0.57922		0.46798
	0.84663		0.66113		0.74512		0.46811
	0.8362		0.7465		0.7131		0.46825
	0.84084		0.62623		0.63866		0.46826
	0.84082		0.58155		0.60766		0.46836
	0.84967		0.75769		0.62385		0.46843
	0.80499		0.58442		0.56439		0.46914
	0.78012		0.62448		0.66017		0.46921
	0.79683		0.74443		0.70425		0.46934
	0.79086		0.62815		0.68114		0.46948
	0.83166		0.64574		0.44396		0.46962
	0.78676		0.60816		0.29547		0.46965
	0.79248		0.74781		0.44722		0.46965
	0.708		0.30333		0.57534		0.46978
	0.78694		0.43802		0.60764		0.47033
	0.78997		0.423		0.73253		0.47064
	0.7626		0.32552		0.57488		0.4708
	0.81036		0.42737		0.44944		0.47084
	0.84773		0.31015		0.34173		0.47097
	0.83091		0.34706		0.67314		0.47105
	0.82761		0.34247		0.60025		0.4712
	0.78522		0.27625		0.65915		0.47132
	0.83326		0.29496		0.5804		0.47165
	0.828		0.37678		0.56014		0.47176
	0.79574		0.28718		0.43179		0.47184
	0.80969		0.34008		0.43672		0.47209
	0.77395		0.42776		0.47785		0.47209
	0.81156		0.50124		0.49912		0.47236
	0.73336		0.20748		0.39603		0.47236
	0.77625		0.45187		0.41336		0.47287
	0.83844		0.24409		0.55987		0.47294
	0.79826		0.30817		0.42539		0.47329
	0.84665		0.32717		0.43514		0.47337
	0.79798		0.24588		0.66454		0.47348
	0.88864		0.51873		0.52968		0.47373
	0.77467		0.3115		0.52277		0.47422
	0.83126		0.47869		0.43244		0.47452
	0.85729		0.33768		0.32287		0.47454
	0.77841		0.38077		0.49169		0.47466
	0.86303		0.33914		0.51939		0.47492
	0.85153		0.27811		0.53598		0.47519
	0.79731		0.33351		0.46994		0.47533
	0.80091		0.3815		0.3244		0.47542
	0.83888		0.34298		0.24735		0.47553
	0.73464		0.35126		0.26507		0.47573
	0.85867		0.39875		0.17044		0.47575
	0.86111		0.30645		0.23495		0.47581
	0.79594		0.23531		0.23416		0.4763
	0.75103		0.31573		0.18441		0.47634
	0.85589		0.39174		0.35956		0.47697
	0.78505		0.25376		0.22808		0.47698
	0.89704		0.40055		0.2342		0.47712
	0.81735		0.30024		0.22993		0.47738
	0.80994		0.36893		0.16451		0.47775
	0.76349		0.41631		0.23874		0.47784
	0.78876		0.32899		0.19166		0.47793
	0.73924		0.35029		0.21093		0.47809
	0.71166		0.30325		0.17951		0.4784
	0.7948		0.31711		0.25566		0.47863
	0.77013		0.30721		0.23108		0.47881
	0.89648		0.29392		0.054909		0.47917
	0.80342		0.39248		0.21718		0.47975
	0.81462		0.29365		0.20285		0.48039
	0.84278		0.4847		0.21865		0.48044
	0.80598		0.38101		0.19525		0.48047
	0.85937		0.1522		0.22378		0.48058
	0.81507		0.22321		0.188		0.48088
	0.86066		0.42983		0.19323		0.48096
	0.81255		0.28812		0.1488		0.48112
	0.81039		0.33214		0.30341		0.48139
	0.74776		0.30523		0.17927		0.48141
	0.821		0.36279		0.14871		0.48151
	0.80696		0.40217		0.21242		0.48152
	0.85385		0.36303		0.23942		0.4817
	0.75248		0.42894		0.23453		0.48173
	0.8467		0.3149		0.20039		0.48174
	0.85457		0.34379		0.22083		0.48229
	0.82435		0.33716		0.35443		0.48239
	0.84464		0.38001		0.56098		0.48242
	0.82363		0.33682		0.52355		0.48304
	0.7301		0.35468		0.4159		0.48326
	0.84512		0.29449		0.41253		0.48401
	0.78525		0.27067		0.54971		0.48453
	0.81759		0.39203		0.54221		0.4848
	0.81977		0.29739		0.41433		0.48493
	0.78307		0.31335		0.53605		0.48504
	0.80703		0.38089		0.57607		0.48504
	0.81834		0.29682		0.37808		0.48514
	0.9397		0.34837		0.45702		0.48518
	0.95139		0.34549		0.44539		0.48531
	0.90615		0.31788		0.44989		0.4855
	0.86513		0.45268		0.43467		0.48556
	0.79769		0.32212		0.46091		0.48562
	0.84925		0.31898		0.54141		0.48579
	0.82077		0.25483		0.5601		0.48601
	0.71874		0.31145		0.43252		0.48608
	0.76536		0.26242		0.45075		0.48616
	0.74527		0.43241		0.41859		0.48622
	0.85794		0.32603		0.59546		0.48665
	0.74991		0.31216		0.4903		0.48693
	0.85448		0.40418		0.51178		0.48722
	0.77812		0.33624		0.53345		0.48726
	0.78947		0.2891		0.51832		0.4876
	0.77764		0.29628		0.68746		0.48808
	0.80326		0.4031		0.38545		0.48827
	0.85876		0.30421		0.51529		0.48871
	0.82754		0.38951		0.40236		0.48882
	0.76217		0.34304		0.5249		0.48887
	0.77687		0.37156		0.55463		0.48933
	0.7822		0.4147		0.54046		0.48941
	0.77569		0.37409		0.52566		0.48945
	0.80702		0.30816		0.50378		0.49018
	0.77982		0.30058		0.49961		0.49044
	0.74097		0.35263		0.48032		0.4905
	0.79425		0.35073		0.44686		0.49114
	0.83495		0.29944		0.42101		0.4914
	0.85404		0.33443		0.38597		0.4922
	0.79389		0.35706		0.49065		0.49267
	0.8152		0.308		0.46319		0.49306
	0.73225		0.33184		0.40146		0.49347
	0.83264		0.22001		0.42587		0.4935
	0.87543		0.38073		0.43434		0.49374
	0.79281		0.41249		0.52724		0.49392
	0.76609		0.33591		0.63065		0.494
	0.73165		0.39842		0.53334		0.49404
	0.7419		0.38497		0.53529		0.49433
	0.75968		0.3866		0.60298		0.49436
	0.77539		0.24187		0.51951		0.49453
	0.8006		0.3389		0.36338		0.49495
	0.77965		0.29198		0.54381		0.49536
	0.76594		0.30231		0.48426		0.49541
	0.88258		0.39366		0.48196		0.49602
	0.84537		0.33781		0.36545		0.49622
	0.84045		0.34986		0.50681		0.49655
	0.80801		0.41442		0.45691		0.49677
	0.78258		0.3974		0.47108		0.4969
	0.89579		0.3575		0.47587		0.49701
	0.76877		0.35669		0.47988		0.49705
	0.77908		0.41153		0.53878		0.49779
	0.85333		0.34441		0.65391		0.49781
	0.78932		0.31014		0.7212		0.49783
	0.83372		0.36574		0.59143		0.49849
	0.43391		0.3055		0.47283		0.49919
	0.61361		0.29463		0.41218		0.49928
	0.64639		0.26515		0.4597		0.49939
	0.54042		0.36922		0.46161		0.4998
	0.62952		0.36691		0.49854		0.49998
	0.58848		0.40968		0.46444		0.50036
	0.5725		0.36573		0.62635		0.50044
	0.56477		0.38071		0.55264		0.50047
	0.59734		0.33532		0.52498		0.50067
	0.57575		0.46985		0.51145		0.50076
	0.554		0.35748		0.50122		0.50102
	0.57994		0.33189		0.43611		0.50108
	0.5194		0.31973		0.45999		0.50148
	0.7015		0.31327		0.40429		0.50156
	0.60212		0.37287		0.51048		0.50165
	0.60393		0.27754		0.45906		0.50169
	0.65785		0.38254		0.82809		0.5017
	0.74446		0.43295		0.54748		0.50194
	0.64247		0.27716		0.63849		0.50204
	0.50098		0.30243		0.4591		0.50231
	0.59763		0.44485		0.40635		0.50232
	0.64613		0.30193		0.45755		0.50265
	0.64781		0.40287		0.39783		0.50346
	0.53464		0.30537		0.42146		0.50413
	1.0057		0.3355		0.52844		0.50429
	0.98602		0.35703		0.47848		0.50458
	0.62803		0.31167		0.40821		0.50538
	0.73885		0.28486		0.46964		0.50542
	0.66124		0.36085		0.52669		0.50582
	0.71084		0.34503		0.48247		0.50585
	0.74958		0.28113		0.60379		0.50594
	0.79836		0.29172		0.47368		0.50671
	0.77349		0.39809		0.56056		0.50688
	0.80349		0.40343		0.54816		0.50727
	0.83425		0.37984		0.41921		0.50774
	0.59576		0.3442		0.41995		0.50795
	0.66527		0.28432		0.50758		0.50813
	0.79839		0.32646		0.56098		0.50874
	0.76444		0.41196		0.52355		0.50893
	0.66836		0.4391		0.4159		0.5091
	0.90005		0.29137		0.41253		0.50934
	0.84278		0.42717		0.54971		0.50938
	0.72852		0.36859		0.54221		0.50969
	0.68077		0.39353		0.41433		0.50971
	0.70344		0.24469		0.53605		0.50975
	0.79912		0.29281		0.57607		0.50996
	0.66965		0.29613		0.37808		0.51016
	0.69315		0.38681		0.45702		0.51071
	0.6893		0.36601		0.44539		0.51102
	0.74875		0.32437		0.44989		0.51103
	0.74356		0.2519		0.43467		0.51121
	0.70136		0.34891		0.46091		0.51125
	0.83179		0.28563		0.54141		0.51135
	0.68716		0.3864		0.5601		0.51213
	0.61172		0.35177		0.43252		0.51218
	0.76494		0.31699		0.45075		0.51264
	0.80125		0.37818		0.41859		0.51272
	0.75193		0.42677		0.59546		0.51309
	0.70682		0.249		0.4903		0.51412
	0.69266		0.37955		0.51178		0.51413
	0.84806		0.42788		0.53345		0.5147
	0.87438		0.38997		0.51832		0.51484
	0.88245		0.37673		0.68746		0.5149
	0.78755		0.40423		0.38545		0.51505
	0.68087		0.33208		0.51529		0.51509
	0.67614		0.34658		0.40236		0.51535
	0.67244		0.29732		0.5249		0.51608
	0.71782		0.38685		0.55463		0.51609
	0.65524		0.28472		0.54046		0.51644
	0.69227		0.40506		0.52566		0.51651
	0.78303		0.365		0.50378		0.51659
	0.71773		0.39006		0.49961		0.51707
	0.74027		0.43629		0.48032		0.5171
	0.72759		0.532		0.44686		0.5173
	0.82744		0.37711		0.42101		0.51731
	0.77489		0.45438		0.38597		0.51802
	0.73451		0.32739		0.49065		0.51804
	0.64337		0.44294		0.46319		0.51829
	0.66708		0.40955		0.40146		0.51842
	0.6888		0.36358		0.42587		0.5186
	0.55277		0.35521		0.43434		0.51895
	0.60981		0.33589		0.52724		0.51935
	0.57045		0.40361		0.63065		0.51935
	0.88876		0.41487		0.53334		0.51978
	0.64147		0.32924		0.53529		0.51997
	0.5959		0.27538		0.60298		0.51998
	0.73737		0.43979		0.51951		0.52018
	0.88217		0.40355		0.36338		0.5202
	0.80862		0.33392		0.54381		0.52057
	0.81699		0.40791		0.48426		0.52066
	0.85034		0.42675		0.48196		0.52093
	0.85038		0.51001		0.36545		0.52122
	0.77025		0.45018		0.50681		0.52146
	0.71595		0.38032		0.45691		0.52146
	0.8018		0.4704		0.47108		0.52161
	0.72853		0.48266		0.47587		0.52187
	0.82832		0.37328		0.47988		0.52212
	0.83586		0.39181		0.53878		0.52216
	0.84602		0.44002		0.65391		0.52241
	0.70964		0.42179		0.7212		0.52255
	0.81689		0.33212		0.59143		0.52256
	0.84488		0.3684		0.47283		0.52257
	0.9292		0.38114		0.41218		0.52262
	0.73239		0.41694		0.4597		0.52285
	0.72867		0.54485		0.46161		0.5235
	0.94109		0.40298		0.49854		0.52369
	0.67842		0.41849		0.46444		0.5237
	0.76696		0.42613		0.62635		0.52374
	0.731		0.49056		0.55264		0.52415
	0.82869		0.4985		0.52498		0.52419
	0.75913		0.51339		0.51145		0.52456
	0.81105		0.41093		0.50122		0.52458
	0.80235		0.53612		0.43611		0.52468
	0.74006		0.45416		0.45999		0.52486
	0.89173		0.43865		0.40429		0.52497
	0.72448		0.51751		0.51048		0.52499
	0.78498		0.48923		0.45906		0.52559
	0.90655		0.46406		0.82809		0.52563
	0.89797		0.41803		0.54748		0.52581
	0.75697		0.53325		0.63849		0.52587
	0.83137		0.47073		0.4591		0.52591
	0.81977		0.5311		0.40635		0.52599
	0.78062		0.48445		0.45755		0.52625
	0.87982		0.42857		0.39783		0.5263
	0.82829		0.38125		0.42146		0.52634
	0.82021		0.50358		0.52844		0.52636
	0.79388		0.38701		0.47848		0.52639
	0.77722		0.39155		0.40821		0.52645
	0.82055		0.40144		0.46964		0.52675
	0.79051		0.49409		0.52669		0.52682
	0.88398		0.50533		0.48247		0.52698
	0.77685		0.39937		0.60379		0.52711
	0.81626		0.36906		0.47368		0.52786
	0.8038		0.4124		0.56056		0.52791
	0.78415		0.46377		0.54816		0.52793
	0.82022		0.79781		0.41921		0.52796
	0.8519		0.88641		0.41995		0.528
	0.89694		0.7725		0.50758		0.52809
	0.7713		0.77035		0.50553		0.52825
	0.86961		0.83532		0.49701		0.5284
	0.90962		0.78311		0.51189		0.52845
	0.83915		0.81334		0.56435		0.52855
	0.85149		0.81401		0.51731		0.52905
	0.82827		0.71033		0.52658		0.52907
	0.78083		0.73112		0.55899		0.52913
	0.84056		0.8119		0.49383		0.52931
	0.71718		0.79659		0.5791		0.52937
	0.82065		0.69494		0.61003		0.52938
	0.82589		0.74206		0.42179		0.52947
	0.72959		0.89547		0.53451		0.52966
	0.78202		0.76323		0.51715		0.52977
	0.69833		0.78452		0.5154		0.52977
	0.82009		0.85256		0.52737		0.5298
	0.70399		0.84506		0.49305		0.52985
	0.80513		0.64266		0.35978		0.53002
	0.73989		0.83221		0.49185		0.53006
	0.79212		0.70475		0.51768		0.53026
	0.72679		0.81312		0.56886		0.53043
	0.795		0.81349		0.53223		0.53068
	0.82971		0.79876		0.47229		0.53079
	0.8179		0.8464		0.50548		0.53101
	0.78439		0.82291		0.44769		0.53101
	0.80769		0.69875		0.48075		0.5312
	0.745		0.86134		0.39862		0.53122
	0.84482		0.80153		0.40745		0.5314
	0.77937		0.79424		0.43525		0.53156
	0.87511		0.72048		0.51957		0.53169
	0.74289		0.8252		0.55506		0.53212
	0.77417		0.69645		0.52319		0.53222
	0.77292		0.78013		0.45906		0.53257
	0.88499		0.80169		0.44554		0.53266
	0.81871		0.83318		0.53452		0.53271
	0.89591		0.83561		0.53216		0.53275
	0.78352		0.68088		0.47693		0.53289
	0.8297		0.83832		0.63028		0.533
	0.84902		0.82338		0.58214		0.53318
	0.7688		0.70141		0.57017		0.5332
	0.80706		0.81959		0.50256		0.53332
	0.94521		0.72692		0.82083		0.5336
	0.8821		0.83766		0.52481		0.53373
	0.85245		0.77666		0.48774		0.53383
	0.77291		0.86682		0.45463		0.53396
	0.88282		0.78787		0.49324		0.53414
	0.8531		0.75984		0.53116		0.53472
	0.81835		0.81239		0.36564		0.53477
	0.74211		0.85501		0.43389		0.53509
	0.70598		0.88526		0.4689		0.53509
	0.74012		0.84891		0.46549		0.53541
	0.72914		0.90294		0.47669		0.53568
	0.73652		0.82699		0.56808		0.5357
	0.75611		0.74894		0.52321		0.53589
	0.7117		-0.040539		0.36238		0.53597
	0.66702		0.12953		0.46208		0.53608
	0.68588		0.25239		0.48384		0.53614
	0.73839		-0.503		0.51922		0.53618
	0.75924		-0.026568		0.55669		0.53622
	0.72861		0.19066		0.44222		0.53649
	0.75825		-0.66156		0.55589		0.53674
	0.74994		-0.1405		0.38014		0.53677
	0.73323		0.1191		0.39414		0.53689
	0.76249		-0.030174		0.47965		0.53698
	0.78675		-0.13251		0.56046		0.53727
	0.71168		-0.31517		0.47174		0.53731
	0.71657		0.10689		0.5		0.53733
	0.71235		0.31087		0.58498		0.53753
	0.75446		-0.11158		0.45484		0.53766
	0.77607		0.15912		0.37852		0.53766
	0.80676		0.55899		0.45215		0.53771
	0.7563		0.63517		0.4339		0.53783
	0.64848		0.61478		0.44181		0.53791
	0.81695		0.66448		0.42106		0.53805
	0.71336		0.69079		0.34651		0.53828
	0.70254		0.81048		0.46222		0.5383
	0.72164		0.67283		0.42216		0.53834
	0.7967		0.72522		0.44918		0.53845
	0.72241		0.76736		0.41254		0.53869
	0.80471		0.71227		0.44042		0.53906
	0.6865		0.69348		0.40494		0.53948
	0.71803		0.7064		0.43043		0.53956
	0.7542		0.73411		0.48487		0.5396
	0.72454		0.69383		0.40262		0.54014
	0.72586		0.69943		0.52855		0.54037
	0.86447		0.76364		0.37216		0.54066
	0.81996		0.65021		0.53119		0.54135
	0.79352		0.72842		0.45547		0.54153
	0.91178		0.77342		0.49668		0.5417
	0.86632		0.67908		0.52638		0.54181
	0.84217		0.66531		0.42498		0.5419
	0.85135		0.66369		0.46552		0.54191
	0.91256		0.64251		0.45764		0.54193
	0.77059		0.68678		0.43121		0.54216
	0.93914		0.63418		0.46355		0.54233
	0.90575		0.70933		0.51381		0.54233
	0.94731		0.67664		0.40615		0.54243
	0.91373		0.6021		0.50848		0.54264
	0.91815		0.78579		0.46516		0.54272
	0.86769		0.64036		0.56954		0.54285
	0.8395		0.67692		0.49002		0.54294
	0.85284		0.64815		0.41191		0.54317
	0.81802		0.69254		0.43649		0.54327
	0.8899		0.54795		0.44976		0.54376
	0.92049		0.60741		0.39367		0.54408
	0.93872		0.58643		0.36233		0.54412
	0.91246		0.74909		0.42827		0.54435
	0.79876		0.66252		0.41395		0.54438
	0.85947		0.69037		0.42833		0.54445
	0.88946		0.78629		0.38263		0.54448
	0.84199		0.70588		0.47235		0.54457
	0.8739		0.58523		0.58311		0.54459
	0.89871		0.59725		0.52096		0.5446
	0.87189		0.68338		0.62761		0.545
	0.91232		0.67217		0.38666		0.5452
	0.91424		0.62665		0.368		0.54566
	0.85271		0.70998		0.44599		0.54591
	0.9115		0.69131		0.44024		0.54596
	0.95119		0.70922		0.49475		0.54634
	0.8673		0.73238		0.40653		0.5467
	0.90168		0.72474		0.50061		0.54677
	0.91029		0.71264		0.46821		0.54719
	0.89576		0.66714		0.41891		0.54721
	0.96682		0.64364		0.46929		0.5473
	0.84773		0.63264		0.45578		0.54731
	0.75736		0.65005		0.41336		0.54741
	0.89952		0.7167		0.55018		0.54742
	0.90835		0.70041		0.46106		0.54746
	0.91263		0.71815		0.42545		0.54771
	0.9032		0.65856		0.49113		0.54839
	0.89699		0.71027		0.42414		0.54843
	0.59308		0.64051		0.51795		0.54856
	0.94971		0.65209		0.36634		0.5486
	0.89997		0.63119		0.48508		0.54869
	0.9404		0.65013		0.46995		0.54932
	0.84347		0.66519		0.41362		0.54993
	0.8471		0.66573		0.45871		0.54993
	0.83109		0.63217		0.41599		0.54995
	0.84325		0.61159		0.45203		0.55004
	0.92525		0.70089		0.49822		0.55014
	0.88051		0.66606		0.46656		0.55016
	0.84823		0.71012		0.59554		0.55022
	0.89594		0.70314		0.4816		0.55026
	0.85779		0.70728		0.46351		0.55028
	0.86401		0.67468		0.50906		0.55044
	0.88117		0.71021		0.46144		0.55076
	0.90229		0.77916		0.43716		0.55079
	0.88395		0.6102		0.39122		0.55102
	0.94426		0.79478		0.40357		0.55126
	0.94394		0.65003		0.55812		0.55132
	0.89845		0.58773		0.43313		0.55136
	0.92432		0.65948		0.62943		0.55192
	0.91849		0.61178		0.4031		0.55196
	0.90151		0.63546		0.4747		0.55215
	0.87837		0.60648		0.41424		0.55239
	0.9096		0.63619		0.30035		0.55242
	0.89884		0.65315		0.33926		0.55248
	0.91802		0.68539		0.49832		0.55251
	0.91879		0.67178		0.28105		0.55263
	0.84867		0.64634		0.35493		0.55327
	0.87192		0.5782		0.55773		0.55331
	0.81557		0.63202		0.32531		0.55344
	0.89149		0.6929		0.42713		0.55348
	0.87355		0.59678		0.28878		0.55352
	0.89815		0.7064		0.33206		0.55415
	0.89645		0.70961		0.43644		0.55421
	0.88038		0.63564		0.51477		0.55467
	0.70565		0.54628		0.3673		0.5547
	0.83706		0.57337		0.43799		0.55518
	0.85406		0.69172		0.40677		0.55536
	0.84355		0.61145		0.53988		0.55555
	0.8228		0.59165		0.54339		0.55564
	0.8159		0.53457		0.47853		0.55565
	0.74315		0.623		0.30507		0.55569
	0.84114		0.61686		0.42658		0.55573
	0.84801		0.58669		0.56789		0.55595
	0.82473		0.62053		0.49354		0.556
	0.82724		0.67566		0.18401		0.55613
	0.88091		0.66797		0.47473		0.55632
	0.77804		0.67103		0.53214		0.55637
	0.85026		0.63411		0.49167		0.5565
	0.7366		0.71277		0.49526		0.55692
	0.85384		0.60856		0.47096		0.55722
	0.8627		0.6558		0.26979		0.55723
	0.87225		0.55449		0.25732		0.55726
	0.76735		0.68312		0.57052		0.55726
	0.83387		0.60692		0.41212		0.55756
	0.89946		0.60155		0.34079		0.55757
	0.82228		0.6551		0.39009		0.5578
	0.85759		0.64718		0.43387		0.55786
	0.78829		0.59136		0.49736		0.55787
	0.82009		0.6455		0.37798		0.55851
	0.81663		0.6172		0.12154		0.55866
	0.89486		0.64615		0.094505		0.5588
	0.80788		0.69996		0.060067		0.55896
	0.7533		0.6093		0.07766		0.55981
	0.77937		0.66867		0.12669		0.56016
	0.76636		0.62313		0.087744		0.56035
	0.7993		0.63579		0.13443		0.56067
	0.79467		0.65792		0.087172		0.56077
	0.80072		0.59492		0.10986		0.56084
	0.68339		0.66679		0.11701		0.56091
	0.7682		0.56869		0.085615		0.56095
	0.79465		0.64499		0.12415		0.56098
	0.75215		0.68703		0.081202		0.56101
	0.92922		0.65342		0.087989		0.56107
	0.93222		0.66283		0.090781		0.56112
	0.85755		0.63657		0.13764		0.56162
	0.87249		0.64724		0.12234		0.56203
	0.77966		0.66158		0.094791		0.56209
	0.83295		0.63412		0.088967		0.56239
	0.78807		0.76513		0.081416		0.56251
	0.80562		0.70766		0.11407		0.56256
	0.83879		0.67494		0.061805		0.56274
	0.83401		0.81014		0.051585		0.56302
	0.78913		0.80351		0.084418		0.56302
	0.84645		0.6132		0.074905		0.56333
	0.81164		0.83474		0.050182		0.56345
	0.81319		0.68745		0.12694		0.56365
	0.8589		0.77		0.09718		0.56399
	0.84774		0.7831		0.078209		0.56418
	0.80474		0.6537		0.10156		0.56433
	0.83022		0.79723		0.057717		0.56438
	0.87652		0.70765		0.11591		0.56506
	0.84563		0.74746		0.11789		0.56523
	0.89876		0.68033		0.13134		0.5653
	0.76907		0.71147		0.099937		0.56535
	0.80288		0.84472		0.85539		0.5654
	0.80009		0.68392		0.92562		0.5654
	0.81458		0.60977		0.86593		0.56546
	0.83688		0.88786		0.82816		0.56551
	0.87525		0.64316		0.74475		0.56562
	0.82123		0.68756		0.83112		0.56769
	0.87351		0.77546		0.85		0.5678
	0.86024		0.83952		0.85014		0.56787
	0.8355		0.73913		0.82002		0.56813
	0.78862		0.94378		0.82617		0.56818
	0.8347		0.55228		0.79481		0.56828
	0.76566		0.80349		0.77697		0.56854
	0.84724		0.91348		0.81697		0.5688
	0.78757		0.59295		0.79989		0.56953
	0.77823		0.6745		0.78822		0.56958
	0.82679		0.8048		0.78853		0.56969
	0.82867		0.73623		0.71057		0.56976
	0.80533		0.7936		0.79475		0.56979
	0.83315		0.84164		0.89379		0.5698
	0.82431		0.79597		0.82932		0.56985
	0.81833		0.72609		0.82194		0.56993
	0.82214		0.68343		0.84771		0.57028
	0.82292		0.84391		0.84474		0.5705
	0.88202		0.80109		0.8522		0.57051
	0.88189		0.76131		0.85646		0.57125
	0.89268		0.75064		0.84393		0.57146
	0.8504		0.65638		0.84373		0.57146
	0.71059		0.61782		0.81779		0.57161
	0.84426		0.71187		0.82877		0.57167
	0.86357		0.83504		0.86048		0.57194
	0.88974		0.89402		0.82003		0.57209
	0.85869		0.76658		0.87822		0.57215
	0.81072		0.75511		0.84676		0.57241
	0.78004		0.55741		0.76386		0.57256
	0.83153		0.87338		0.88064		0.57276
	0.84894		0.71778		0.79218		0.57298
	0.84844		0.79293		0.81382		0.57303
	0.85707		0.57606		0.81807		0.57328
	0.80837		0.52076		0.83585		0.5736
	0.84393		0.58779		0.80226		0.57365
	0.85907		0.57905		0.82988		0.57373
	0.79645		0.46015		0.85174		0.57402
	0.85831		0.61339		0.82766		0.57403
	0.83978		1.0989		0.82252		0.57407
	0.87734		0.76841		0.8402		0.57413
	0.85662		0.74719		0.84542		0.57415
	0.79929		1.1223		0.82148		0.57449
	0.80846		0.84873		0.88278		0.57472
	0.86474		0.70164		0.89233		0.57481
	0.83395		0.77469		0.827		0.57539
	0.81468		0.77453		0.81168		0.5755
	0.82268		0.79568		0.83694		0.57555
	0.80385		0.74845		0.8509		0.57561
	0.80093		0.75252		0.2286		0.57585
	0.82623		0.92451		0.21387		0.57585
	0.82561		0.86276		0.22262		0.57608
	0.82021		0.822		0.31828		0.57615
	0.78718		0.71048		0.25774		0.57633
	0.86751		0.82883		0.27088		0.57635
	0.7806		1.0811		0.28617		0.57635
	0.83605		0.66353		0.2345		0.57658
	0.82962		0.94434		0.20776		0.57658
	0.84086		1.0458		0.30077		0.57665
	0.86054		0.89026		0.27046		0.57672
	0.79253		1.0365		0.23268		0.57697
	0.83864		0.64927		0.32049		0.57743
	0.81729		1.0199		0.34705		0.57753
	0.80865		0.94252		0.17346		0.57768
	0.78934		0.70974		0.3206		0.57782
	0.80394		0.68449		0.2784		0.57812
	0.8183		0.7498		0.19259		0.57812
	0.72354		0.866		0.19782		0.57844
	0.7993		0.96343		0.19366		0.57857
	0.67076		1.0165		0.19674		0.57857
	0.71398		0.79715		0.26849		0.57859
	0.71639		0.64935		0.16004		0.5786
	0.65685		0.80154		0.223		0.57907
	0.78266		0.78824		0.24908		0.5791
	0.82832		0.8093		0.3102		0.57925
	0.82426		0.74883		0.23952		0.57969
	0.80123		0.8614		0.26615		0.57974
	0.88717		0.78481		0.32146		0.57981
	0.72239		0.68775		0.28698		0.58016
	0.7452		0.95968		0.36617		0.58035
	0.77996		0.59635		0.80484		0.58055
	0.7556		0.71736		0.21302		0.58064
	0.82171		0.84031		0.30172		0.5808
	0.77721		1.0602		0.35977		0.58102
	0.97844		0.91989		0.26872		0.58111
	0.97431		0.57185		0.20842		0.58111
	0.97558		0.99571		0.36967		0.58138
	0.99343		0.78983		0.27246		0.5816
	0.97778		0.82929		0.40357		0.58178
	0.96364		0.67468		0.27702		0.58186
	0.95665		0.8881		0.23276		0.58193
	0.98965		0.9425		0.25654		0.58208
	0.98573		0.80801		0.3002		0.58216
	0.96741		0.94669		0.28064		0.58299
	1.0072		0.83433		0.34765		0.58321
	0.96294		0.82547		0.34353		0.58347
	0.99629		1.0621		0.33027		0.58361
	1.0091		1.0733		0.43753		0.58364
	0.99895		0.69755		0.28461		0.58365
	0.98566		0.7482		0.36737		0.58399
	1.0049		0.86781		0.31371		0.58469
	1.0156		0.72192		0.23688		0.58474
	1.0233		0.85296		0.23255		0.58501
	0.99709		0.63131		0.27649		0.58527
	0.94857		0.66203		0.31588		0.58534
	0.98573		0.92365		0.27281		0.5858
	0.98713		0.88853		0.28797		0.5858
	1.0056		0.85564		0.28242		0.58653
	1.001		0.77952		0.26797		0.58666
	1.0119		0.72853		0.22516		0.58679
	0.99803		0.70648		0.17649		0.58702
	0.98947		0.68764		0.25376		0.58729
	1.0006		1.0499		0.21652		0.5874
	1.0027		0.75362		0.31544		0.58805
	0.99996		0.78754		0.30991		0.58858
	1.012		0.7081		0.28774		0.58892
	0.98702		0.88082		0.29433		0.58897
	0.98791		0.89311		0.22084		0.58897
	0.98631		0.89416		0.35025		0.58911
	1.0019		0.69188		0.22323		0.58925
	1.0247		0.4621		0.27231		0.58966
	0.97425		0.72636		0.18232		0.5898
	0.99646		0.7441		0.30125		0.59009
	1.0215		0.93808		0.26935		0.59023
	1.0103		0.76709		0.42791		0.59034
	0.99767		0.81907		0.47042		0.59074
	1.0059		0.85931		0.44704		0.59076
	0.96536		0.73095		0.43163		0.59077
	0.98971		0.78119		0.37456		0.59079
	1.0071		0.77988		0.54884		0.59109
	0.99385		0.87809		0.40944		0.59111
	0.97953		0.98878		0.45496		0.59117
	0.98865		0.9939		0.4015		0.59119
	0.98134		0.7221		0.58814		0.59147
	0.99774		0.82135		0.39111		0.59185
	0.99034		1.0314		0.3551		0.59215
	0.98545		0.94854		0.26972		0.59222
	1.0055		0.82157		0.34069		0.59223
	0.99807		0.99221		0.32648		0.59236
	0.99122		0.87787		0.30241		0.59236
	0.99642		0.80512		0.3085		0.59248
	1.0221		0.7019		0.36026		0.59251
	1.0138		0.82413		0.28909		0.59277
	0.96913		0.68267		0.40192		0.59299
	0.98664		0.57716		0.41581		0.59318
	0.98956		1.1862		0.43857		0.59339
	0.97588		0.70514		0.42077		0.59357
	0.97972		0.90465		0.41369		0.59377
	0.97875		0.75424		0.37869		0.59379
	0.97834		0.84138		0.49183		0.59394
	0.98942		0.64245		0.40264		0.59404
	0.97648		0.89193		0.56388		0.59414
	0.9877		0.57015		0.58338		0.59453
	0.99573		0.92462		0.42439		0.59492
	0.98796		0.70601		0.42694		0.59493
	0.99881		0.74641		0.42452		0.59563
	1.0109		0.68297		0.383		0.59603
	1.0086		0.77091		0.52764		0.59621
	0.98717		0.78895		0.39888		0.59628
	1.0081		0.99418		0.38036		0.59639
	1.0131		0.83247		0.39969		0.59649
	1.0307		0.6624		0.53899		0.59669
	0.97552		0.95538		0.44012		0.59676
	1.0032		0.67808		0.48907		0.59681
	0.99709		0.82212		0.49345		0.59685
	0.98541		0.87425		0.37157		0.59692
	0.99898		0.66677		0.39505		0.59693
	0.98178		0.82972		0.38538		0.59702
	1.0274		0.87458		0.43921		0.59704
	0.98802		0.92612		0.54076		0.59708
	0.98057		0.79327		0.55815		0.59717
	0.98889		0.60812		0.54464		0.59717
	1.0183		1.2057		0.31543		0.59733
	1.0285		0.83403		0.58118		0.59733
	1.0018		0.54552		0.47199		0.59747
	0.99949		0.85262		0.80633		0.59748
	1.0157		0.81188		0.59271		0.59757
	0.99031		0.77687		0.48992		0.59782
	1.0225		0.82466		0.48527		0.59825
	1.0125		0.61044		0.38766		0.59844
	0.99979		0.7794		0.34404		0.59863
	1.0095		0.80575		0.41778		0.59877
	1.0257		1.0303		0.51911		0.5989
	0.97632		0.76964		0.45457		0.59908
	0.93613		0.89169		0.52291		0.59913
	1.0059		0.95194		0.47747		0.59925
	1.0262		0.97493		0.39893		0.59934
	0.96604		0.97459		0.51206		0.59982
	0.98544		0.92923		0.43717		0.60038
	1.013		0.96288		0.48746		0.60043
	0.99587		0.99379		0.42439		0.60054
	0.97968		0.95216		0.43361		0.60063
	0.97967		0.92861		0.51113		0.60063
	1.0053		0.98169		0.48645		0.60109
	0.98867		0.95311		0.28273		0.60114
	0.9826		0.99236		0.40456		0.60141
	1.0111		0.97058		0.36697		0.60183
	0.99734		0.99074		0.42405		0.60203
	1.0174		0.99123		0.23846		0.60257
	1.0001		0.99089		0.25803		0.60277
	0.99567		0.96528		0.27923		0.60282
	1.0202		1.0045		0.22891		0.60294
	1.0091		0.93795		0.34648		0.60321
	0.99891		0.97708		0.35788		0.60324
	0.984		0.98488		0.34376		0.60331
	0.99784		0.96118		0.2895		0.60343
	0.99767		0.97785		0.3734		0.60373
	0.99005		0.98255		0.49099		0.60417
	1.023		0.94442		0.31775		0.60446
	0.99654		0.94028		0.41661		0.60463
	0.98965		0.98561		0.41066		0.60465
	0.99314		0.96313		0.3866		0.60475
	1.0112		0.99179		0.36773		0.60479
	1.0016		0.92373		0.5436		0.60482
	0.98909		0.9674		0.35991		0.60497
	1.0035		1.0014		0.34105		0.60509
	1.0126		0.98737		0.33258		0.60515
	1.0126		0.97595		0.39367		0.60542
	0.98398		0.97432		0.36126		0.60549
	0.98838		0.99509		0.36194		0.60555
	1.004		0.99224		0.3751		0.6057
	0.97737		0.96786		0.3863		0.60585
	1.0022		0.97655		0.3153		0.60602
	0.99929		0.96468		0.27496		0.6066
	0.98046		0.95549		0.35806		0.60673
	0.98991		0.97065		0.3795		0.6069
	0.99523		0.97728		0.34503		0.60698
	0.99313		0.97882		0.32378		0.60699
	0.99827		0.93173		0.31482		0.60715
	1.0238		0.97084		0.27267		0.60774
	0.985		0.99454		0.3654		0.6078
	0.97746		0.97569		0.33329		0.60786
	0.97842		1.0051		0.31065		0.60808
	0.98673		0.98171		0.32121		0.60815
	0.9844		0.99442		0.37472		0.60816
	0.9932		0.95658		0.4381		0.60825
	0.99539		0.98833		0.60134		0.6084
	0.99133		0.94615		0.38244		0.60881
	0.99468		0.94078		0.54926		0.60904
	1.0125		0.96166		0.51709		0.60935
	0.99003		0.98803		0.54118		0.60941
	0.99228		0.98559		0.43957		0.60971
	0.99466		0.96151		0.46225		0.60984
	1.0077		0.97857		0.46859		0.61004
	1.0153		0.97612		0.63184		0.61008
	1.0084		0.96902		0.60198		0.61024
	1.0182		0.95684		0.50739		0.61057
	1.0039		1.0107		0.47922		0.61057
	1.008		0.99295		0.47697		0.61064
	1.009		1.0225		0.48734		0.61067
	1.0049		0.98126		0.47096		0.61069
	1.017		0.97326		0.47653		0.61074
	0.99407		0.99478		0.49558		0.6114
	0.98672		0.97543		0.56641		0.61141
	1.002		0.98279		0.51748		0.61144
	1.0288		0.95806		0.59799		0.61155
	1.0099		0.97469		0.57508		0.6119
	0.98969		0.99819		0.49706		0.61212
	0.98582		0.96355		0.50223		0.61227
	1.0008		0.97413		0.44068		0.61241
	1.0081		0.9915		0.54682		0.61266
	1.007		0.99373		0.4459		0.61281
	1.0072		0.98801		0.42523		0.61293
	0.98211		0.96465		0.54521		0.613
	0.97892		0.96322		0.55583		0.61301
	1.0087		0.99861		0.49398		0.61315
	0.9952		1.0074		0.59401		0.61337
	1.0045		0.97413		0.50657		0.6134
	1.0057		0.98941		0.4192		0.61346
	0.98806		0.95445		0.62236		0.61383
	1.0021		0.98733		0.53918		0.61401
	1.0245		0.9815		0.57665		0.61411
	1.0197		0.95553		0.58728		0.61462
	1.0158		1.0027		0.71978		0.61466
	1.0077		0.95769		0.6743		0.6148
	1.0076		0.97116		0.52969		0.6149
	1.0073		0.9882		0.64576		0.61522
	0.97723		1.0186		0.69703		0.61538
	0.95703		0.96994		0.61979		0.61561
	1.0202		0.98041		0.57922		0.61565
	0.98997		0.97881		0.67387		0.6161
	1.0081		0.9872		0.49663		0.61614
	0.99171		0.96362		0.6491		0.61637
	0.9864		1.0016		0.55009		0.61647
	1.0021		0.93437		0.58517		0.61652
	0.96172		0.99294		0.45036		0.61666
	1.0068		0.97428		0.64041		0.61726
	0.98211		0.98978		0.60646		0.61748
	1.0055		0.99493		0.56232		0.61749
	0.9945		0.98165		0.53654		0.61758
	0.99313		0.98674		0.49076		0.61761
	0.99996		0.96019		0.49152		0.61775
	0.96763		0.95495		0.62151		0.61779
	0.9976		0.97876		0.58664		0.61798
	0.99785		0.98698		0.54223		0.61816
	0.98356		0.95735		0.51676		0.61831
	0.9987		0.99193		0.5177		0.61859
	0.98963		0.926		0.61841		0.61882
	0.99695		0.97251		0.48077		0.61885
	1.0075		0.9581		0.59581		0.61887
	1.0244		0.98209		0.56231		0.61889
	1.0035		0.98914		0.54945		0.61897
	0.99069		0.98046		0.64477		0.61912
	0.99097		1.0174		0.489		0.61917
	0.97196		0.9966		0.54922		0.61953
	1.0079		0.9399		0.45535		0.61954
	0.98743		0.94656		0.57356		0.61962
	0.97182		0.92433		0.34843		0.61976
	1.0005		1.0072		0.38293		0.62
	0.99612		0.96909		0.37895		0.62001
	0.97312		0.9827		0.38058		0.62046
	1.016		1.0159		0.32053		0.6205
	0.99407		0.97375		0.30933		0.62061
	1.0032		0.9357		0.33459		0.62087
	1.0297		0.96397		0.27354		0.62132
	1.0039		0.95087		0.41133		0.62138
	1.0015		0.91913		0.41734		0.62154
	0.99763		0.98453		0.30646		0.62159
	0.98954		0.97698		0.36142		0.62188
[truncated: 4,642 more rows]
